# Supplementary material for: Theoretical investigation of a chiral Brønsted acid (CBA)-catalyzed isomerization reaction of BCB: mechanism and origin of stereoselectivity
Source: Royal Society of Chemistry journal article supplement (doi:10.1039/d4nj01986e), 2024-01-01
Supplement: d4nj01986e1.pdf [file d4nj01986e1.pdf]

Electronic Supporting Information For

**Theoretical Investigation on A Chiral Brønsted acid (CBA)-Catalyzed Isomerization Reaction of BCB: Mechanism and Origin of Stereoselectivity**

Yu-Nuo Wang and Yang Wang

**Content**

Part 1: Structures and energies for intermediates involved in Pathway A .....S2

Part 2: Derivations for the computed ee values .....S3

Part 3: Test of different methods and solvation model .....S4

Part 4: Energies and Cartesian coordinates of all the stationary points .....S5

## Part 1: Structures and energies for intermediates involved in Pathway A

### Pathway A

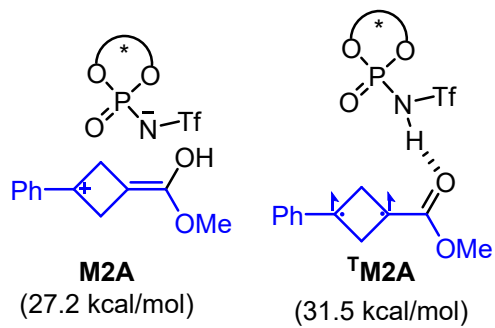

Fig. S1 Structures and energies for intermediates involved in Pathway A

## Part 2: Derivations for the computed ee values

In the equations, the  $\Delta G^\ddagger$  is the energy difference of the two enantioselective transition states, R and T represent the gas constant ( $8.314 \text{ J}\cdot\text{mol}^{-1}\cdot\text{K}^{-1}$ ) and temperature of the reaction. In this reaction, the energy difference between TS2R and TS2S is 2.0 kcal/mol, the value of  $[R]/[S]$  is 29.68. Then, we can obtain the predicted ee value of 93.4%, which aligns with the experimental observations.

Moreover, we have provided the detailed derivations in ESI and added the sentence “The detailed derivations for the computed ee value is provided in Part X of ESI.” in Page 3 Line 39 of the revised manuscript. In addition, the following sentences is provided in Part X of ESI:

The predicted ee value can be calculated using Boltzmann distribution with the equations:

$$\frac{[R]}{[S]} = \frac{e^{\frac{-G_R^\ddagger}{RT}}}{e^{\frac{-G_S^\ddagger}{RT}}} = e^{\Delta G^\ddagger / RT} \quad (1)$$

$$ee\% = \frac{[S] - [R]}{[S] + [R]} \times 100\% = \frac{\frac{[S]}{[R]} - 1}{\frac{[S]}{[R]} + 1} \times 100\% \quad (2)$$

In the equations, the  $\Delta G^\ddagger$  is the energy difference of the two enantioselective transition states, R and T represent the gas constant ( $8.314 \text{ J}\cdot\text{mol}^{-1}\cdot\text{K}^{-1}$ ) and temperature of the reaction. As depicted in Fig. 1 of the main text, the energy barriers of R- and S-configured pathways are 12.5 and 10.5 kcal/mol, respectively. Based on the equation (1), the energy difference ( $\Delta G^\ddagger$ ) between TS2R and TS2S is 2.0 kcal/mol, the value of  $[R]/[S]$  is 29.68. Then, we can obtain the predicted ee value by equation (2), which is calculated to be 93.4%.

### Part 3: Test of different methods and solvation model

**Table S1.** Text of different methods and solvation models involved in rate-determining step

|                  | M06-2X/6-31G(d, p) |      | B3LYP/6-31G(d, p) |      | $\omega$ B97X-D/6-31G(d, p) |      |
|------------------|--------------------|------|-------------------|------|-----------------------------|------|
|                  | IEF-PCM            | SMD  | IEF-PCM           | SMD  | IEF-PCM                     | SMD  |
| <b>CBA+React</b> | 0.0                | 0.0  | 0.0               | 0.0  | 0.0                         | 0.0  |
| <b>M1</b>        | -7.5               | 1.0  | 4.0               | 5.1  | -7.0                        | -4.7 |
| <b>TS1</b>       | 5.2                | 13.6 | 18.4              | 18.7 | 5.6                         | 8.2  |

## Part 4: Energies and Cartesian coordinates of all the stationary points

### 1. Energies of all the stationary points

|                         | G (a.u.)     | G-correct (a.u.) | Imaginary frequency (cm <sup>-1</sup> ) |
|-------------------------|--------------|------------------|-----------------------------------------|
| M06-2X/IEF-PCM          |              |                  |                                         |
| <b>React</b>            | -614.483551  | 0.17387          | –                                       |
| <b>CBA</b>              | -8534.802728 | 0.594153         | –                                       |
| <b>M1</b>               | -9149.292179 | 0.796498         | –                                       |
| <b>TS1</b>              | -9149.269168 | 0.794448         | -540.37                                 |
| <b>M2</b>               | -9149.281698 | 0.79447          | –                                       |
| <b>M2A</b>              | -9149.238396 | 0.793563         | –                                       |
| <b><sup>‡</sup>M2A</b>  | -9149.231452 | 0.788005         | –                                       |
| <b>TS2R</b>             | -9149.272255 | 0.791362         | -764.92                                 |
| <b>TS2S</b>             | -9149.275412 | 0.791753         | -1072.96                                |
| <b>PR</b>               | -614.495606  | 0.172963         | –                                       |
| <b>PS</b>               | -614.496156  | 0.172246         | –                                       |
| M06-2X/SMD              |              |                  |                                         |
| <b>React</b>            | -614.494796  | 0.174449         | –                                       |
| <b>CBA</b>              | -8534.846677 | 0.594199         | –                                       |
| <b>M1</b>               | -9149.339893 | 0.797996         | –                                       |
| <b>TS1</b>              | -9149.319849 | 0.793057         | -765.11                                 |
| B3LYP/IEF-PCM           |              |                  |                                         |
| <b>React</b>            | -614.74174   | 0.170719         | –                                       |
| <b>CBA</b>              | -8535.713393 | 0.584238         | –                                       |
| <b>M1</b>               | -9150.448754 | 0.776059         | –                                       |
| <b>TS1</b>              | -9150.425771 | 0.772089         | -922.48                                 |
| B3LYP/SMD               |              |                  |                                         |
| <b>React</b>            | -614.753221  | 0.170519         | –                                       |
| <b>CBA</b>              | -8535.757251 | 0.583698         | –                                       |
| <b>M1</b>               | -9150.502321 | 0.775004         | –                                       |
| <b>TS1</b>              | -9150.480639 | 0.776572         | -945.95                                 |
| $\omega$ B97X-D/IEF-PCM |              |                  |                                         |
| <b>React</b>            | -614.542954  | 0.173076         | –                                       |
| <b>CBA</b>              | -8534.920894 | 0.596835         | –                                       |
| <b>M1</b>               | -9149.475032 | 0.798957         | –                                       |
| <b>TS1</b>              | -9149.459857 | 0.792482         | -985.37                                 |
| $\omega$ B97X-D/SMD     |              |                  |                                         |
| <b>React</b>            | -614.554004  | 0.173807         | –                                       |
| <b>CBA</b>              | -8534.964805 | 0.596816         | –                                       |
| <b>M1</b>               | -9149.526292 | 0.797025         | –                                       |

|     |              |         |          |
|-----|--------------|---------|----------|
| TS1 | -9149.505806 | 0.79095 | -1059.80 |
|-----|--------------|---------|----------|

## 2. Cartesian coordinates of all the stationary points

### M06-2X/IEF-PCM

#### React

|   |             |             |             |
|---|-------------|-------------|-------------|
| C | -2.94975100 | -0.26932800 | -1.08036600 |
| C | -1.82650300 | 0.55244900  | -1.11981600 |
| C | -1.01776300 | 0.70372700  | 0.01065700  |
| C | -1.35636500 | 0.02072400  | 1.18624200  |
| C | -2.47826900 | -0.79964600 | 1.22165700  |
| C | -3.27930600 | -0.94755900 | 0.08992600  |
| H | -3.56949600 | -0.37541900 | -1.96489900 |
| H | -1.57562200 | 1.09072700  | -2.02878000 |
| H | -0.73284400 | 0.11942500  | 2.06931000  |
| H | -2.72756300 | -1.32706800 | 2.13675200  |
| H | -4.15604900 | -1.58592000 | 0.12251400  |
| C | 0.18406000  | 1.55404700  | -0.06184000 |
| C | 1.09822400  | 1.72761100  | -1.22579800 |
| C | 1.08580800  | 2.03294700  | 1.02545200  |
| C | 1.62505600  | 1.07706400  | 0.01497500  |
| H | 1.47151200  | 2.72219500  | -1.46575700 |
| H | 0.92606700  | 1.07627600  | -2.07866300 |
| H | 1.44369800  | 3.06093600  | 0.98764700  |
| H | 0.91849500  | 1.63744300  | 2.02325200  |
| C | 1.87294100  | -0.34225600 | 0.27453500  |
| O | 1.92129800  | -0.83467400 | 1.38206600  |
| O | 1.97813000  | -1.04956700 | -0.86002700 |
| C | 2.10694600  | -2.46199100 | -0.67706700 |
| H | 2.17886100  | -2.88565400 | -1.67647700 |
| H | 3.00363200  | -2.68955200 | -0.09804400 |
| H | 1.23340500  | -2.85620200 | -0.15452000 |

#### 2a

|   |            |             |             |
|---|------------|-------------|-------------|
| C | 3.75743700 | 1.38788400  | -0.25655600 |
| C | 2.40364300 | 1.29249500  | 0.03694700  |
| C | 1.78792800 | 0.03824100  | 0.14557000  |
| C | 2.55531400 | -1.11515100 | -0.04675900 |
| C | 3.91265300 | -1.01865000 | -0.34054900 |
| C | 4.51614100 | 0.23175700  | -0.44563700 |
| H | 4.22506700 | 2.36376700  | -0.33984000 |
| H | 1.81285600 | 2.19226000  | 0.18514400  |
| H | 2.08240800 | -2.09007100 | 0.03590800  |
| H | 4.49858600 | -1.92028400 | -0.48789300 |
| H | 5.57422300 | 0.30758000  | -0.67462600 |

|   |             |             |             |
|---|-------------|-------------|-------------|
| C | 0.36471400  | -0.07723400 | 0.45729200  |
| C | -0.63157500 | 0.78929300  | 0.70092700  |
| C | -0.51089100 | -1.30352300 | 0.64192300  |
| C | -1.66475000 | -0.30278500 | 0.93075100  |
| H | -0.71601600 | 1.87012100  | 0.73516900  |
| H | -0.67139600 | -1.91167300 | -0.25143200 |
| H | -0.25195600 | -1.94456400 | 1.48938300  |
| H | -2.08355700 | -0.33976300 | 1.94113100  |
| C | -2.78434800 | -0.29219500 | -0.08058800 |
| O | -2.82217700 | -0.93193600 | -1.10545500 |
| O | -3.74025100 | 0.57719600  | 0.27969500  |
| C | -4.82174200 | 0.71212800  | -0.64671100 |
| H | -5.31913100 | -0.24862300 | -0.79165000 |
| H | -5.50549000 | 1.43428000  | -0.20545500 |
| H | -4.45330800 | 1.07133800  | -1.60941900 |

**CBA**

|   |             |             |             |
|---|-------------|-------------|-------------|
| C | -2.12222500 | 2.00616500  | -0.56894100 |
| C | -3.22001500 | 2.74615300  | -0.11297300 |
| C | -4.36280100 | 2.08879700  | 0.30790200  |
| C | -4.42788400 | 0.69968000  | 0.30499200  |
| C | -3.31971100 | -0.05743900 | -0.08167600 |
| C | -2.16337800 | 0.62260300  | -0.49786900 |
| C | -1.38775600 | 4.23848400  | -0.29151200 |
| C | -2.91735700 | 4.22120400  | -0.12052400 |
| H | -5.33001100 | 0.19479200  | 0.63289900  |
| H | -0.90745300 | 4.15349200  | 0.68846800  |
| H | -1.01325200 | 5.14167300  | -0.77940400 |
| H | -3.43238000 | 4.71856400  | -0.95096400 |
| C | -1.07160300 | 2.95831200  | -1.11547800 |
| C | 0.41154700  | 2.64252200  | -1.10425800 |
| C | -1.29188600 | 3.23658300  | -2.63097400 |
| C | 1.03468200  | 3.27230700  | -2.18468700 |
| C | 1.17506700  | 1.91185700  | -0.21036100 |
| C | 0.01698600  | 3.89955100  | -3.10017100 |
| H | -1.42384700 | 2.28053700  | -3.14806200 |
| H | -2.17922600 | 3.84849400  | -2.81090400 |
| C | 2.41437500  | 3.21866800  | -2.29601200 |
| C | 2.56878700  | 1.82403000  | -0.31949800 |
| H | -0.00236700 | 4.98811300  | -2.96934500 |
| C | 3.17984300  | 2.51912500  | -1.36954100 |
| H | 4.25961100  | 2.49060400  | -1.46800700 |
| H | -3.25100400 | 4.70564300  | 0.80072700  |
| H | 0.24209400  | 3.70579800  | -4.15187100 |

|    |             |             |             |
|----|-------------|-------------|-------------|
| Br | -5.84150700 | 3.09716100  | 0.91828000  |
| C  | -3.35600100 | -1.53977500 | 0.04074000  |
| C  | -3.66354400 | -2.09064900 | 1.29252500  |
| C  | -3.08646700 | -2.39430300 | -1.04903100 |
| C  | -3.67131600 | -3.46357300 | 1.49787600  |
| H  | -3.87265700 | -1.42181800 | 2.12288300  |
| C  | -3.10041300 | -3.80354900 | -0.84040900 |
| C  | -2.82505600 | -1.90149600 | -2.37908100 |
| C  | -3.38567600 | -4.33987100 | 0.44503700  |
| H  | -3.89382700 | -3.86418800 | 2.48213300  |
| C  | -2.82534500 | -4.69141900 | -1.92666400 |
| C  | -2.57244700 | -2.74607300 | -3.40675700 |
| H  | -2.84551000 | -0.83095900 | -2.55221600 |
| C  | -3.37696000 | -5.76783200 | 0.62996600  |
| C  | -2.82499300 | -6.09731300 | -1.71713400 |
| C  | -2.55329900 | -4.17258100 | -3.21996700 |
| H  | -2.38149300 | -2.35564000 | -4.40217700 |
| C  | -3.10836100 | -6.60512100 | -0.39977400 |
| H  | -3.59224300 | -6.15723000 | 1.62057900  |
| C  | -2.55055900 | -6.94811600 | -2.79419900 |
| C  | -2.28565800 | -5.05649600 | -4.27129900 |
| H  | -3.10318700 | -7.68104700 | -0.25127300 |
| C  | -2.28349600 | -6.43107700 | -4.05775300 |
| H  | -2.54850000 | -8.02195000 | -2.63127800 |
| H  | -2.07848200 | -4.65552300 | -5.25919100 |
| H  | -2.07266400 | -7.10435300 | -4.88195800 |
| C  | 3.37552500  | 1.05374900  | 0.66230700  |
| C  | 3.22266100  | 1.34004200  | 2.02168700  |
| C  | 4.30078500  | 0.06975600  | 0.25314400  |
| C  | 3.99713100  | 0.70942100  | 2.98304100  |
| H  | 2.48331700  | 2.07400700  | 2.32568100  |
| C  | 5.11129900  | -0.56281900 | 1.23848600  |
| C  | 4.43846200  | -0.35771500 | -1.11807200 |
| C  | 4.96253100  | -0.23161100 | 2.61285100  |
| H  | 3.86066800  | 0.95037700  | 4.03300200  |
| C  | 6.08050700  | -1.54088600 | 0.85242700  |
| C  | 5.35263000  | -1.28963900 | -1.47978900 |
| H  | 3.77424200  | 0.06264200  | -1.86445000 |
| C  | 5.80412100  | -0.87801200 | 3.58655400  |
| C  | 6.90424700  | -2.15773300 | 1.83378000  |
| C  | 6.22253800  | -1.90424100 | -0.51304300 |
| H  | 5.43334500  | -1.60360600 | -2.51656900 |
| C  | 6.73271100  | -1.79110900 | 3.21604800  |
| H  | 5.67483900  | -0.61107100 | 4.63145500  |



|    |             |             |             |
|----|-------------|-------------|-------------|
| C  | 7.85338700  | -3.10476800 | 1.43206700  |
| C  | 7.18147100  | -2.85823500 | -0.87370200 |
| H  | 7.36519300  | -2.27081400 | 3.95756000  |
| C  | 7.99050200  | -3.44913300 | 0.09098800  |
| H  | 8.48308900  | -3.57202200 | 2.18382300  |
| H  | 7.28418600  | -3.13451300 | -1.91919700 |
| H  | 8.73019300  | -4.18647500 | -0.20325600 |
| O  | -1.02295600 | -0.12437000 | -0.79495200 |
| O  | 0.50894100  | 1.17983500  | 0.78224200  |
| P  | 0.11485600  | -0.30656500 | 0.33208000  |
| O  | 1.17365000  | -1.20251800 | -0.13527200 |
| Br | 3.26007700  | 4.09880300  | -3.74156700 |
| N  | -0.75524100 | -0.76253700 | 1.71571400  |
| H  | -1.30901200 | -1.61967400 | 1.64661200  |
| S  | -0.63730800 | -0.22641100 | 3.27599800  |
| O  | -1.22798800 | -1.25765200 | 4.10068500  |
| O  | 0.66133600  | 0.34465700  | 3.53627000  |
| C  | -1.83900900 | 1.17674400  | 3.30684600  |
| F  | -3.04346800 | 0.72737800  | 2.98508000  |
| F  | -1.47657000 | 2.12058400  | 2.45519600  |
| F  | -1.85975700 | 1.66510200  | 4.53547200  |

**M1**

|   |             |            |             |
|---|-------------|------------|-------------|
| C | 2.62164900  | 2.57791800 | 0.02408100  |
| C | 3.69800700  | 3.08941000 | -0.70536300 |
| C | 4.69341100  | 2.23309500 | -1.14202400 |
| C | 4.63387900  | 0.87345700 | -0.86345300 |
| C | 3.53866700  | 0.33341600 | -0.17980700 |
| C | 2.51622500  | 1.20928300 | 0.22000100  |
| C | 2.07471000  | 4.80697600 | -0.54926600 |
| C | 3.54831600  | 4.57151300 | -0.92526900 |
| H | 5.43776500  | 0.21762000 | -1.17969100 |
| H | 1.44155400  | 4.61582700 | -1.42191200 |
| H | 1.87017400  | 5.81847800 | -0.18843100 |
| H | 4.23473600  | 5.13110700 | -0.27822300 |
| C | 1.76938000  | 3.72872600 | 0.52739000  |
| C | 0.28159600  | 3.59418000 | 0.77379000  |
| C | 2.24974800  | 4.21217900 | 1.92704900  |
| C | -0.10638100 | 4.43528500 | 1.81950500  |
| C | -0.67131100 | 2.83709900 | 0.11456000  |
| C | 1.09384000  | 5.07591300 | 2.46478200  |
| H | 2.38111100  | 3.33711700 | 2.57253400  |
| H | 3.20343000  | 4.74339400 | 1.87338600  |
| C | -1.44953700 | 4.54376100 | 2.13985400  |

|    |             |             |             |
|----|-------------|-------------|-------------|
| C  | -2.03284800 | 2.93445100  | 0.42597700  |
| H  | 1.18314500  | 6.12385500  | 2.15388600  |
| C  | -2.40928300 | 3.81665800  | 1.44420900  |
| H  | -3.45917000 | 3.91658400  | 1.69863400  |
| H  | 3.77651600  | 4.85236400  | -1.95660500 |
| H  | 1.02438700  | 5.06833400  | 3.55558900  |
| Br | 6.15775500  | 2.93473800  | -2.11340000 |
| C  | 3.49781200  | -1.13221200 | 0.07476300  |
| C  | 3.70277100  | -1.99597400 | -1.00644600 |
| C  | 3.32746700  | -1.66647700 | 1.37057400  |
| C  | 3.70751700  | -3.37305400 | -0.84220600 |
| H  | 3.83216200  | -1.57203200 | -1.99743300 |
| C  | 3.31421500  | -3.08071300 | 1.53703500  |
| C  | 3.19652200  | -0.84367100 | 2.54856000  |
| C  | 3.50284400  | -3.93858800 | 0.41948100  |
| H  | 3.85103700  | -4.02378200 | -1.70052900 |
| C  | 3.09159100  | -3.65115400 | 2.82976400  |
| C  | 3.00718900  | -1.38673600 | 3.77564900  |
| H  | 3.26413600  | 0.23381000  | 2.44490500  |
| C  | 3.44077500  | -5.36504100 | 0.60945600  |
| C  | 3.01550800  | -5.06223600 | 2.98522600  |
| C  | 2.92315700  | -2.81040100 | 3.96150300  |
| H  | 2.91329100  | -0.74715300 | 4.64882500  |
| C  | 3.19795300  | -5.90095500 | 1.82896100  |
| H  | 3.57339800  | -6.00197600 | -0.26109500 |
| C  | 2.76416300  | -5.59693000 | 4.25350100  |
| C  | 2.67903100  | -3.38421400 | 5.21490400  |
| H  | 3.13716900  | -6.97768300 | 1.95988400  |
| C  | 2.59677000  | -4.76515900 | 5.35643200  |
| H  | 2.70157600  | -6.67537000 | 4.36832600  |
| H  | 2.55192500  | -2.73557800 | 6.07710000  |
| H  | 2.40409500  | -5.19735500 | 6.33301900  |
| C  | -3.06695700 | 2.17895400  | -0.33051300 |
| C  | -3.17344400 | 2.39829300  | -1.70596600 |
| C  | -3.97064400 | 1.30998200  | 0.31230800  |
| C  | -4.18550700 | 1.81462500  | -2.45369200 |
| H  | -2.45424100 | 3.05345400  | -2.18852500 |
| C  | -5.02770200 | 0.73364200  | -0.44635100 |
| C  | -3.85708900 | 0.95907500  | 1.70664600  |
| C  | -5.14030800 | 0.99758100  | -1.83883300 |
| H  | -4.25550400 | 2.00767700  | -3.52041200 |
| C  | -5.98639200 | -0.11595500 | 0.18949200  |
| C  | -4.75535900 | 0.13828600  | 2.30155700  |
| H  | -3.01382000 | 1.34410900  | 2.26909500  |

|    |             |             |             |
|----|-------------|-------------|-------------|
| C  | -6.23439100 | 0.41885000  | -2.57631200 |
| C  | -7.05948900 | -0.67028200 | -0.56110100 |
| C  | -5.86279400 | -0.41983600 | 1.57106100  |
| H  | -4.64688700 | -0.12572600 | 3.34970500  |
| C  | -7.15443000 | -0.36746900 | -1.96660200 |
| H  | -6.30603100 | 0.63357300  | -3.63878600 |
| C  | -7.98212200 | -1.50557500 | 0.07950500  |
| C  | -6.80530200 | -1.26080600 | 2.17384400  |
| H  | -7.97762900 | -0.79690900 | -2.53076200 |
| C  | -7.85441700 | -1.79632400 | 1.43391400  |
| H  | -8.80122800 | -1.92749900 | -0.49611000 |
| H  | -6.70577200 | -1.49345600 | 3.23029300  |
| H  | -8.57716500 | -2.44708700 | 1.91534400  |
| O  | 1.35182300  | 0.68458000  | 0.78172100  |
| O  | -0.24077800 | 1.89180000  | -0.82359400 |
| P  | 0.06135100  | 0.45293400  | -0.16560700 |
| O  | -1.02261200 | -0.18523400 | 0.58404100  |
| Br | -1.97489900 | 5.67830300  | 3.55908300  |
| N  | 0.58112100  | -0.37101700 | -1.54458900 |
| H  | 0.70168100  | -1.38724300 | -1.37625900 |
| S  | 1.21882100  | 0.16928800  | -2.95950000 |
| O  | 1.77296700  | 1.49701000  | -2.83460700 |
| O  | 1.96503500  | -0.93402100 | -3.53230700 |
| C  | -0.28363100 | 0.35642800  | -4.01462300 |
| F  | -1.20672100 | 1.05399100  | -3.37211900 |
| F  | -0.76818900 | -0.84092100 | -4.31495900 |
| F  | 0.06281900  | 0.98412700  | -5.12592700 |
| C  | -4.14813900 | -3.75377700 | -1.04219200 |
| C  | -3.06045600 | -4.62221900 | -1.05870200 |
| C  | -1.86124700 | -4.24089700 | -1.66956400 |
| C  | -1.77860200 | -2.98025000 | -2.27419600 |
| C  | -2.86291000 | -2.11118600 | -2.24739800 |
| C  | -4.05215300 | -2.49690900 | -1.63309600 |
| H  | -5.07542200 | -4.05796100 | -0.56603200 |
| H  | -3.14292000 | -5.60527500 | -0.60513500 |
| H  | -0.86367000 | -2.68119000 | -2.77458800 |
| H  | -2.77999700 | -1.12820400 | -2.70307400 |
| H  | -4.90207400 | -1.82493200 | -1.62687400 |
| C  | -0.68704600 | -5.13037000 | -1.62507500 |
| C  | -0.36476100 | -6.17163500 | -0.60129500 |
| C  | 0.68556000  | -4.88936100 | -2.15367700 |
| C  | 0.49474800  | -4.95422800 | -0.67500700 |
| H  | 0.06814600  | -7.11590000 | -0.92913800 |
| H  | -1.03058700 | -6.24047400 | 0.25498100  |

|   |             |             |             |
|---|-------------|-------------|-------------|
| H | 1.21684900  | -5.71897700 | -2.61908600 |
| H | 0.90367800  | -3.91110100 | -2.57459500 |
| C | 0.46626900  | -3.78498800 | 0.19699500  |
| O | 0.68028500  | -2.64929500 | -0.19567500 |
| O | 0.12523500  | -4.06531300 | 1.44800400  |
| C | -0.10350400 | -2.92088600 | 2.28956400  |
| H | -0.19104000 | -3.31786100 | 3.29963900  |
| H | 0.73266300  | -2.22305100 | 2.21633700  |
| H | -1.01630300 | -2.41186500 | 1.97430800  |

**TS1**

|    |             |             |             |
|----|-------------|-------------|-------------|
| C  | 4.06354200  | -0.46442900 | -0.02919400 |
| C  | 5.07123500  | -1.03566100 | -0.80833500 |
| C  | 4.99462800  | -2.38098200 | -1.13059100 |
| C  | 3.91425900  | -3.15607300 | -0.72373700 |
| C  | 2.86822900  | -2.58766900 | 0.00966700  |
| C  | 2.96917200  | -1.22704100 | 0.34193600  |
| C  | 5.35820400  | 1.31482700  | -0.89008800 |
| C  | 6.09482400  | -0.00271900 | -1.20015000 |
| H  | 3.86722600  | -4.20532000 | -0.99499400 |
| H  | 4.74185000  | 1.59774500  | -1.74929300 |
| H  | 6.02953600  | 2.14644200  | -0.65999600 |
| H  | 7.00671000  | -0.11421800 | -0.60066700 |
| C  | 4.42014100  | 0.97352600  | 0.30470800  |
| C  | 3.36816200  | 2.05266900  | 0.51328100  |
| C  | 5.20429900  | 1.08217500  | 1.64322300  |
| C  | 3.85495000  | 3.01764900  | 1.40083700  |
| C  | 2.10836200  | 2.22240800  | -0.03955900 |
| C  | 5.16637500  | 2.58051900  | 1.99960800  |
| H  | 4.67062200  | 0.51022800  | 2.40953000  |
| H  | 6.21737300  | 0.68022000  | 1.55904000  |
| C  | 3.11032000  | 4.15946600  | 1.64679600  |
| C  | 1.35373900  | 3.38255700  | 0.18259600  |
| H  | 5.99981200  | 3.13240800  | 1.54837300  |
| C  | 1.87804800  | 4.36095700  | 1.02919700  |
| H  | 1.31501900  | 5.26946700  | 1.21552200  |
| H  | 6.38584200  | -0.09323100 | -2.24988600 |
| H  | 5.20330300  | 2.76553400  | 3.07616000  |
| Br | 6.38159700  | -3.17208600 | -2.14896600 |
| C  | 1.62780300  | -3.35926800 | 0.29253700  |
| C  | 0.98710600  | -3.97655800 | -0.78605800 |
| C  | 1.02485900  | -3.39175300 | 1.56707500  |
| C  | -0.26927200 | -4.54869900 | -0.65291300 |
| H  | 1.45077800  | -3.92963900 | -1.76730000 |

|   |             |             |             |
|---|-------------|-------------|-------------|
| C | -0.26391000 | -3.98088700 | 1.70800700  |
| C | 1.66772400  | -2.86790100 | 2.74696300  |
| C | -0.92291300 | -4.54677800 | 0.58233600  |
| H | -0.77041700 | -4.96468700 | -1.52154700 |
| C | -0.91168300 | -3.99554800 | 2.98375100  |
| C | 1.05963200  | -2.89485200 | 3.95635000  |
| H | 2.66520700  | -2.45196300 | 2.65086600  |
| C | -2.24048200 | -5.10782700 | 0.74666200  |
| C | -2.21062700 | -4.56003600 | 3.12086500  |
| C | -0.26021000 | -3.44556800 | 4.11974800  |
| H | 1.56305400  | -2.49866600 | 4.83361800  |
| C | -2.85332500 | -5.11730200 | 1.95626700  |
| H | -2.73241000 | -5.51486000 | -0.13128200 |
| C | -2.82851800 | -4.55430200 | 4.37656600  |
| C | -0.91048200 | -3.46438500 | 5.35872500  |
| H | -3.84430700 | -5.54818300 | 2.07223300  |
| C | -2.18324400 | -4.01161900 | 5.48319600  |
| H | -3.82135300 | -4.98340900 | 4.47853100  |
| H | -0.40810300 | -3.04377700 | 6.22519300  |
| H | -2.67573800 | -4.01732800 | 6.45020000  |
| C | 0.07027800  | 3.57975100  | -0.55459500 |
| C | 0.15242400  | 3.78352300  | -1.93500300 |
| C | -1.18983200 | 3.56128100  | 0.07350200  |
| C | -0.98212300 | 3.97786400  | -2.70775400 |
| H | 1.13108600  | 3.78207300  | -2.40539400 |
| C | -2.35901000 | 3.73911400  | -0.72167600 |
| C | -1.35126900 | 3.33780400  | 1.48972800  |
| C | -2.25111400 | 3.95340400  | -2.12189300 |
| H | -0.89125500 | 4.13512200  | -3.77876300 |
| C | -3.65444800 | 3.69143900  | -0.11502900 |
| C | -2.57900200 | 3.28711200  | 2.06018200  |
| H | -0.46208800 | 3.17401300  | 2.08793500  |
| C | -3.45086300 | 4.12526300  | -2.90064400 |
| C | -4.82290600 | 3.86797200  | -0.90733500 |
| C | -3.77895900 | 3.46043400  | 1.28169900  |
| H | -2.68122600 | 3.10557400  | 3.12623700  |
| C | -4.67573000 | 4.08509000  | -2.32386200 |
| H | -3.34743800 | 4.28801100  | -3.96972000 |
| C | -6.08056600 | 3.82603800  | -0.29155100 |
| C | -5.05514500 | 3.41272000  | 1.85655500  |
| H | -5.57438400 | 4.21613400  | -2.91998600 |
| C | -6.19290500 | 3.60052000  | 1.07733300  |
| H | -6.97077300 | 3.96926200  | -0.89802500 |
| H | -5.14701200 | 3.23315000  | 2.92387300  |

|           |             |             |             |
|-----------|-------------|-------------|-------------|
| H         | -7.17444800 | 3.56413900  | 1.53913300  |
| O         | 1.93695700  | -0.60493200 | 1.02592000  |
| O         | 1.53118700  | 1.17722900  | -0.75624900 |
| P         | 0.75074200  | 0.10658400  | 0.18857600  |
| O         | -0.21169300 | 0.66012200  | 1.16357800  |
| Br        | 3.78568100  | 5.45774400  | 2.84780100  |
| N         | 0.08324000  | -0.92725500 | -0.87650300 |
| H         | -1.35088300 | -1.05243600 | -0.61011300 |
| S         | 0.41473600  | -1.14940100 | -2.42407700 |
| O         | 1.83432700  | -1.15082400 | -2.73878800 |
| O         | -0.43471900 | -2.22826100 | -2.91262800 |
| C         | -0.29356800 | 0.37643000  | -3.23516500 |
| F         | 0.66898600  | 1.23291400  | -3.54102000 |
| F         | -1.15977700 | 0.96446800  | -2.41252900 |
| F         | -0.92966200 | 0.02504700  | -4.34691800 |
| C         | -7.35291600 | 0.01576100  | -0.20278800 |
| C         | -5.98898100 | 0.20072400  | -0.01008900 |
| C         | -5.17082900 | -0.88950300 | 0.30312700  |
| C         | -5.72432900 | -2.17047800 | 0.42346300  |
| C         | -7.08562500 | -2.35039100 | 0.21281100  |
| C         | -7.90044800 | -1.26037400 | -0.09631000 |
| H         | -7.98256300 | 0.86864200  | -0.43457100 |
| H         | -5.55928700 | 1.19583200  | -0.07794200 |
| H         | -5.09418900 | -3.02365600 | 0.65509700  |
| H         | -7.51468400 | -3.34322700 | 0.29349400  |
| H         | -8.96425700 | -1.40918200 | -0.25034900 |
| C         | -3.74349900 | -0.61560800 | 0.54748300  |
| C         | -2.99639300 | 0.37144700  | -0.20899900 |
| C         | -2.75456000 | -1.56682400 | 1.01446500  |
| C         | -2.56769200 | -1.13031100 | -0.48416600 |
| H         | -2.17525200 | 0.90424500  | 0.26800600  |
| H         | -3.51633600 | 0.88934000  | -1.01034000 |
| H         | -1.91320400 | -1.19458600 | 1.59690900  |
| H         | -3.06646400 | -2.58738000 | 1.21782200  |
| C         | -3.10389700 | -1.93751100 | -1.62089100 |
| O         | -3.37687300 | -3.11135500 | -1.55522600 |
| O         | -3.18291200 | -1.18167900 | -2.71480100 |
| C         | -3.47741600 | -1.88756900 | -3.92700600 |
| H         | -3.52017200 | -1.12819700 | -4.70443500 |
| H         | -2.67524800 | -2.59961100 | -4.12738300 |
| H         | -4.43209100 | -2.40796300 | -3.83833600 |
| <b>M2</b> |             |             |             |
| C         | 3.83278200  | 0.11177200  | 0.06833000  |

|    |             |             |             |
|----|-------------|-------------|-------------|
| C  | 4.99292200  | -0.35980500 | -0.55399600 |
| C  | 5.13189800  | -1.71378900 | -0.80615100 |
| C  | 4.12239800  | -2.60815300 | -0.47452900 |
| C  | 2.92951900  | -2.14614100 | 0.08614900  |
| C  | 2.79291300  | -0.77083400 | 0.33070200  |
| C  | 5.01036700  | 2.00162900  | -0.73157300 |
| C  | 5.92431600  | 0.77371500  | -0.89450200 |
| H  | 4.24372900  | -3.66676700 | -0.67690000 |
| H  | 4.45685300  | 2.17117400  | -1.66065500 |
| H  | 5.55042700  | 2.91805200  | -0.47950600 |
| H  | 6.77672300  | 0.79894800  | -0.20474000 |
| C  | 4.00210200  | 1.59229800  | 0.37863400  |
| C  | 2.83179800  | 2.55348200  | 0.45814800  |
| C  | 4.64400700  | 1.81826300  | 1.77876100  |
| C  | 3.12123500  | 3.58349300  | 1.35717800  |
| C  | 1.62086300  | 2.54601000  | -0.21212300 |
| C  | 4.41655300  | 3.31329300  | 2.07730300  |
| H  | 4.10420100  | 1.21268500  | 2.51425100  |
| H  | 5.69688700  | 1.52564100  | 1.80104500  |
| C  | 2.22445600  | 4.62917100  | 1.49985000  |
| C  | 0.68238100  | 3.57716200  | -0.03998600 |
| H  | 5.22221300  | 3.93943900  | 1.67532900  |
| C  | 1.01943000  | 4.63963400  | 0.80320700  |
| H  | 0.32370900  | 5.46142700  | 0.93539900  |
| H  | 6.33052100  | 0.67284100  | -1.90416100 |
| H  | 4.34215400  | 3.53179800  | 3.14570000  |
| Br | 6.71915500  | -2.34621400 | -1.62510100 |
| C  | 1.80603600  | -3.09631500 | 0.30934000  |
| C  | 1.36402300  | -3.84697300 | -0.78458900 |
| C  | 1.18513500  | -3.26395500 | 1.56444900  |
| C  | 0.28906400  | -4.71691900 | -0.68035600 |
| H  | 1.84847100  | -3.70438600 | -1.74529200 |
| C  | 0.10224400  | -4.18168700 | 1.68298400  |
| C  | 1.62695400  | -2.57407000 | 2.75153400  |
| C  | -0.36178300 | -4.89681900 | 0.54484500  |
| H  | -0.05630900 | -5.25942200 | -1.55582200 |
| C  | -0.51682900 | -4.40431900 | 2.95352400  |
| C  | 1.03831400  | -2.78393800 | 3.95292600  |
| H  | 2.45911100  | -1.88340300 | 2.66968000  |
| C  | -1.47930600 | -5.79497900 | 0.68755100  |
| C  | -1.59571400 | -5.32462000 | 3.07343800  |
| C  | -0.05473400 | -3.70867400 | 4.10266500  |
| H  | 1.39131800  | -2.25945500 | 4.83605500  |
| C  | -2.06728900 | -6.00122700 | 1.89194500  |

|    |             |             |             |
|----|-------------|-------------|-------------|
| H  | -1.83126900 | -6.31846700 | -0.19715900 |
| C  | -2.17377100 | -5.54276100 | 4.33102600  |
| C  | -0.66339000 | -3.94977000 | 5.34031300  |
| H  | -2.90174900 | -6.68948100 | 1.99095200  |
| C  | -1.70780300 | -4.86329500 | 5.45301400  |
| H  | -2.99272400 | -6.25077900 | 4.42001700  |
| H  | -0.30526800 | -3.41792500 | 6.21706100  |
| H  | -2.16364700 | -5.04466100 | 6.42084100  |
| C  | -0.63342200 | 3.49294300  | -0.72890600 |
| C  | -0.64786500 | 3.33073800  | -2.11640100 |
| C  | -1.84918100 | 3.48097000  | -0.01316700 |
| C  | -1.83294700 | 3.15160000  | -2.81447000 |
| H  | 0.29590100  | 3.32437200  | -2.65017600 |
| C  | -3.06825600 | 3.29950100  | -0.72731600 |
| C  | -1.91385500 | 3.58456400  | 1.42399500  |
| C  | -3.05702400 | 3.12887500  | -2.13928200 |
| H  | -1.81433600 | 3.01340900  | -3.89139500 |
| C  | -4.31545800 | 3.25577400  | -0.02567900 |
| C  | -3.09727500 | 3.57455400  | 2.08395200  |
| H  | -0.98886200 | 3.65787900  | 1.98321000  |
| C  | -4.30110000 | 2.91233100  | -2.83171300 |
| C  | -5.52955200 | 3.03491500  | -0.73378100 |
| C  | -4.34567400 | 3.41153600  | 1.38715500  |
| H  | -3.12027400 | 3.66511000  | 3.16685800  |
| C  | -5.47905000 | 2.86398100  | -2.16351500 |
| H  | -4.27008000 | 2.78333900  | -3.90989200 |
| C  | -6.73573900 | 2.98377500  | -0.02479600 |
| C  | -5.57299800 | 3.35392300  | 2.05849400  |
| H  | -6.41154100 | 2.69685500  | -2.69489400 |
| C  | -6.75568700 | 3.14380300  | 1.35682900  |
| H  | -7.66041600 | 2.81472000  | -0.56892600 |
| H  | -5.59040400 | 3.47418500  | 3.13832500  |
| H  | -7.69923000 | 3.10055500  | 1.89066300  |
| O  | 1.58276100  | -0.29304800 | 0.80255000  |
| O  | 1.31391300  | 1.45947800  | -1.01271500 |
| P  | 0.48413500  | 0.26258800  | -0.27272300 |
| O  | -0.69819700 | 0.70125700  | 0.49735200  |
| Br | 2.63385000  | 6.04723000  | 2.68822000  |
| N  | 0.17239600  | -0.79799700 | -1.43625200 |
| H  | -2.50507100 | -1.59193100 | -3.28492100 |
| S  | 0.84256900  | -1.18771400 | -2.79589100 |
| O  | 2.30135900  | -1.13433200 | -2.84515700 |
| O  | 0.17633600  | -2.38034100 | -3.32390700 |
| C  | 0.30263600  | 0.11919900  | -3.98150500 |



|   |             |             |             |
|---|-------------|-------------|-------------|
| F | 0.94303900  | 1.26374600  | -3.77600200 |
| F | -1.01068000 | 0.33982900  | -3.85972700 |
| F | 0.54641700  | -0.28688300 | -5.22356200 |
| C | -3.56223500 | 0.19821000  | 2.97976500  |
| C | -3.36712600 | 0.07688800  | 1.61894500  |
| C | -3.06389000 | -1.19295100 | 1.07134000  |
| C | -2.94233300 | -2.32914000 | 1.90648600  |
| C | -3.13129500 | -2.19301100 | 3.26797900  |
| C | -3.44498400 | -0.93392800 | 3.79418200  |
| H | -3.79393500 | 1.16430900  | 3.41343800  |
| H | -3.40733100 | 0.94295500  | 0.96554000  |
| H | -2.70333900 | -3.29591700 | 1.47027300  |
| H | -3.03532400 | -3.05102500 | 3.92419300  |
| H | -3.59469900 | -0.83353100 | 4.86486600  |
| C | -2.82690800 | -1.30391800 | -0.30163700 |
| C | -3.00239900 | -0.36327200 | -1.43410500 |
| C | -2.47965100 | -2.44085500 | -1.18328000 |
| C | -3.08173800 | -1.61696200 | -2.36357900 |
| H | -2.06570600 | 0.18097400  | -1.60324100 |
| H | -3.84094000 | 0.33773400  | -1.38927700 |
| H | -1.38484000 | -2.47640000 | -1.29949300 |
| H | -2.87180500 | -3.43075400 | -0.93873000 |
| C | -4.52481700 | -1.99660200 | -2.56596700 |
| O | -5.30598000 | -2.10727100 | -1.64584300 |
| O | -4.84124400 | -2.18618800 | -3.84369100 |
| C | -6.20836400 | -2.54169600 | -4.08942900 |
| H | -6.29356000 | -2.66070700 | -5.16683200 |
| H | -6.45171200 | -3.47360700 | -3.57695800 |
| H | -6.87096000 | -1.75118200 | -3.73374900 |

## M2A

|   |             |            |             |
|---|-------------|------------|-------------|
| C | 0.28575900  | 3.48104700 | 0.39000900  |
| C | 0.88294500  | 4.62561100 | -0.14287900 |
| C | 2.20889200  | 4.58225900 | -0.53592100 |
| C | 2.95194900  | 3.41531400 | -0.40290300 |
| C | 2.34952500  | 2.24734400 | 0.07417300  |
| C | 0.99100500  | 2.28782000 | 0.42298200  |
| C | -1.44960200 | 5.03513000 | -0.00242300 |
| C | -0.10721400 | 5.75707200 | -0.23288600 |
| H | 3.99908100  | 3.39877900 | -0.68576600 |
| H | -1.82381600 | 4.64853200 | -0.95567900 |
| H | -2.21853000 | 5.67532200 | 0.43842900  |
| H | 0.09196500  | 6.51354100 | 0.53608400  |
| C | -1.09276700 | 3.83301700 | 0.91413700  |

|    |             |             |             |
|----|-------------|-------------|-------------|
| C  | -2.21574700 | 2.81934900  | 0.98998800  |
| C  | -1.02041800 | 4.29344900  | 2.40002600  |
| C  | -3.04341200 | 3.10563400  | 2.07781800  |
| C  | -2.52123200 | 1.75887100  | 0.15257200  |
| C  | -2.47203500 | 4.22451600  | 2.90799000  |
| H  | -0.40627300 | 3.57688900  | 2.95657100  |
| H  | -0.56684700 | 5.28265600  | 2.50270300  |
| C  | -4.19783600 | 2.36431700  | 2.26679300  |
| C  | -3.68537600 | 0.99829300  | 0.33527500  |
| H  | -3.01812100 | 5.15745800  | 2.72191400  |
| C  | -4.53020700 | 1.32869100  | 1.40072800  |
| H  | -5.44353300 | 0.76288500  | 1.55258900  |
| H  | -0.05520300 | 6.26056300  | -1.20177700 |
| H  | -2.54295900 | 4.01923600  | 3.97938300  |
| Br | 3.00675300  | 6.13515100  | -1.26434900 |
| C  | 3.15328500  | 0.99896700  | 0.16998600  |
| C  | 3.81149400  | 0.54361000  | -0.97928000 |
| C  | 3.32072900  | 0.30880900  | 1.38983200  |
| C  | 4.58802900  | -0.60468900 | -0.95792400 |
| H  | 3.66671500  | 1.08038500  | -1.91192300 |
| C  | 4.13376900  | -0.86217900 | 1.41611000  |
| C  | 2.74921100  | 0.76480900  | 2.63388900  |
| C  | 4.74449800  | -1.33555300 | 0.22426900  |
| H  | 5.05684700  | -0.95687100 | -1.87252900 |
| C  | 4.37204400  | -1.54933300 | 2.64785900  |
| C  | 3.00239300  | 0.13003000  | 3.80434700  |
| H  | 2.12835100  | 1.65411200  | 2.62646300  |
| C  | 5.50516300  | -2.55675800 | 0.26291800  |
| C  | 5.17280900  | -2.72499000 | 2.66876600  |
| C  | 3.83154700  | -1.04469600 | 3.86013100  |
| H  | 2.58274900  | 0.50676300  | 4.73307700  |
| C  | 5.70334900  | -3.22581700 | 1.42612500  |
| H  | 5.90558800  | -2.93407000 | -0.67495900 |
| C  | 5.42523600  | -3.35983400 | 3.89203400  |
| C  | 4.11339900  | -1.70273700 | 5.06223300  |
| H  | 6.28412400  | -4.14387600 | 1.44520800  |
| C  | 4.90580000  | -2.84821300 | 5.07577200  |
| H  | 6.03952300  | -4.25589200 | 3.90392300  |
| H  | 3.70972300  | -1.30634900 | 5.98965700  |
| H  | 5.11758300  | -3.34486600 | 6.01720900  |
| C  | -4.03646700 | -0.09011800 | -0.61501400 |
| C  | -4.15375300 | 0.23225200  | -1.97024000 |
| C  | -4.26442100 | -1.41332900 | -0.19012100 |
| C  | -4.52222900 | -0.71762500 | -2.90969500 |

|    |             |             |             |
|----|-------------|-------------|-------------|
| H  | -3.95049100 | 1.25127900  | -2.28471400 |
| C  | -4.66025100 | -2.38703800 | -1.15053500 |
| C  | -4.07906200 | -1.83790500 | 1.17570200  |
| C  | -4.79604000 | -2.03240900 | -2.51968600 |
| H  | -4.60540700 | -0.44255400 | -3.95714300 |
| C  | -4.91788900 | -3.73376000 | -0.74454800 |
| C  | -4.32056700 | -3.11504400 | 1.55742400  |
| H  | -3.71550800 | -1.11508100 | 1.89775500  |
| C  | -5.20348700 | -3.03597000 | -3.46862700 |
| C  | -5.32546500 | -4.70305100 | -1.70125800 |
| C  | -4.76331200 | -4.11006200 | 0.61619200  |
| H  | -4.16824200 | -3.41741200 | 2.58981200  |
| C  | -5.45987400 | -4.30736600 | -3.07930400 |
| H  | -5.29930200 | -2.74475300 | -4.51075500 |
| C  | -5.57914800 | -6.01365200 | -1.28064800 |
| C  | -5.02445400 | -5.43170700 | 0.99595300  |
| H  | -5.76794300 | -5.05745600 | -3.80233000 |
| C  | -5.43062600 | -6.37238300 | 0.05512100  |
| H  | -5.89332400 | -6.75124400 | -2.01390600 |
| H  | -4.90572700 | -5.71580900 | 2.03780200  |
| H  | -5.63199700 | -7.39305400 | 0.36414800  |
| O  | 0.34071900  | 1.10820600  | 0.74448500  |
| O  | -1.62709900 | 1.43332000  | -0.85609500 |
| P  | -0.47171200 | 0.35195200  | -0.47026200 |
| O  | -0.96471900 | -0.92548800 | 0.09111900  |
| Br | -5.32357800 | 2.77306400  | 3.73410700  |
| N  | 0.47057700  | 0.24005300  | -1.76774800 |
| H  | 2.64370500  | -0.96867300 | -3.31595600 |
| S  | 0.74737000  | 1.21285300  | -2.95755600 |
| O  | 0.50955800  | 2.63538500  | -2.73680300 |
| O  | 2.01883700  | 0.82923500  | -3.59553600 |
| C  | -0.50166400 | 0.71889400  | -4.21325000 |
| F  | -1.73018800 | 0.84795500  | -3.71926800 |
| F  | -0.31565200 | -0.54722700 | -4.57093000 |
| F  | -0.38523800 | 1.49194300  | -5.28880100 |
| C  | 2.27164700  | -4.55393100 | 3.61411600  |
| C  | 2.46931200  | -4.52298800 | 2.24936000  |
| C  | 1.87918200  | -3.48637200 | 1.48208300  |
| C  | 1.08761100  | -2.48470000 | 2.10709500  |
| C  | 0.88400500  | -2.54220400 | 3.47080700  |
| C  | 1.48345800  | -3.56439800 | 4.21667600  |
| H  | 2.72977700  | -5.32615800 | 4.22074900  |
| H  | 3.07875300  | -5.27307400 | 1.75378800  |
| H  | 0.62668600  | -1.70524800 | 1.50237400  |

|   |            |             |             |
|---|------------|-------------|-------------|
| H | 0.28119800 | -1.78906200 | 3.96459800  |
| H | 1.33589900 | -3.59222900 | 5.29213300  |
| C | 2.10134900 | -3.40911200 | 0.10932700  |
| C | 2.83162600 | -4.25879100 | -0.88789300 |
| C | 1.74820900 | -2.36172800 | -0.88662100 |
| C | 2.64829000 | -3.10362000 | -1.85137100 |
| H | 2.24609900 | -5.16360200 | -1.11697500 |
| H | 3.84157300 | -4.57262100 | -0.60030300 |
| H | 0.66837400 | -2.33975900 | -1.10356600 |
| H | 2.01333600 | -1.34075800 | -0.57930300 |
| C | 3.25685100 | -2.81227300 | -3.00332300 |
| O | 3.15983400 | -1.69116000 | -3.72616700 |
| O | 4.06886000 | -3.74049900 | -3.55510800 |
| C | 5.00342900 | -3.30249000 | -4.53830700 |
| H | 5.57863000 | -4.18781300 | -4.80561900 |
| H | 4.49560200 | -2.90734500 | -5.41906700 |
| H | 5.67621700 | -2.53930800 | -4.13450700 |

#### **<sup>T</sup>M2A**

|   |             |             |             |
|---|-------------|-------------|-------------|
| C | -2.62173800 | -2.57747200 | 0.02384400  |
| C | -3.69798800 | -3.08910600 | -0.70565800 |
| C | -4.69326600 | -2.23287100 | -1.14275800 |
| C | -4.63375600 | -0.87315700 | -0.86451800 |
| C | -3.53867200 | -0.33301000 | -0.18076200 |
| C | -2.51632000 | -1.20879800 | 0.21944500  |
| C | -2.07479800 | -4.80669200 | -0.54880400 |
| C | -3.54833800 | -4.57128300 | -0.92508400 |
| H | -5.43757800 | -0.21736700 | -1.18101700 |
| H | -1.44150800 | -4.61576100 | -1.42140000 |
| H | -1.87033100 | -5.81810800 | -0.18768300 |
| H | -4.23485900 | -5.13062400 | -0.27792400 |
| C | -1.76963700 | -3.72818200 | 0.52764300  |
| C | -0.28189500 | -3.59365500 | 0.77431700  |
| C | -2.25029700 | -4.21125700 | 1.92732900  |
| C | 0.10583200  | -4.43458800 | 1.82027000  |
| C | 0.67116800  | -2.83676200 | 0.11511400  |
| C | -1.09456600 | -5.07497000 | 2.46547000  |
| H | -2.38169400 | -3.33602600 | 2.57257700  |
| H | -3.20401600 | -4.74240300 | 1.87362900  |
| C | 1.44892500  | -4.54311100 | 2.14085100  |
| C | 2.03265800  | -2.93418700 | 0.42675200  |
| H | -1.18390400 | -6.12297000 | 2.15478200  |
| C | 2.40884700  | -3.81623800 | 1.44520300  |
| H | 3.45868400  | -3.91622700 | 1.69980700  |

|    |             |             |             |
|----|-------------|-------------|-------------|
| H  | -3.77642600 | -4.85246900 | -1.95635100 |
| H  | -1.02532400 | -5.06716200 | 3.55628800  |
| Br | -6.15751500 | -2.93481300 | -2.11406400 |
| C  | -3.49781000 | 1.13260900  | 0.07377900  |
| C  | -3.70216700 | 1.99641700  | -1.00749100 |
| C  | -3.32796500 | 1.66678900  | 1.36968300  |
| C  | -3.70671600 | 3.37349700  | -0.84320000 |
| H  | -3.83120600 | 1.57251800  | -1.99854700 |
| C  | -3.31449800 | 3.08100500  | 1.53620400  |
| C  | -3.19769900 | 0.84390000  | 2.54768300  |
| C  | -3.50247400 | 3.93895500  | 0.41859700  |
| H  | -3.84973100 | 4.02428900  | -1.70156000 |
| C  | -3.09227700 | 3.65134800  | 2.82904600  |
| C  | -3.00881600 | 1.38687500  | 3.77488400  |
| H  | -3.26549600 | -0.23356100 | 2.44393900  |
| C  | -3.44009700 | 5.36538500  | 0.60864700  |
| C  | -3.01589200 | 5.06240200  | 2.98458500  |
| C  | -2.92454500 | 2.81051200  | 3.96083100  |
| H  | -2.91545000 | 0.74723500  | 4.64807500  |
| C  | -3.19760700 | 5.90120100  | 1.82826200  |
| H  | -3.57215000 | 6.00238100  | -0.26194800 |
| C  | -2.76495400 | 5.59699300  | 4.25298500  |
| C  | -2.68081000 | 3.38422600  | 5.21435900  |
| H  | -3.13655900 | 6.97790800  | 1.95923500  |
| C  | -2.59825500 | 4.76514500  | 5.35596300  |
| H  | -2.70213600 | 6.67541300  | 4.36787000  |
| H  | -2.55424000 | 2.73552800  | 6.07658600  |
| H  | -2.40588400 | 5.19726700  | 6.33264200  |
| C  | 3.06691000  | -2.17897300 | -0.32981600 |
| C  | 3.17342600  | -2.39861800 | -1.70522400 |
| C  | 3.97071200  | -1.31001300 | 0.31285700  |
| C  | 4.18556400  | -1.81521300 | -2.45304400 |
| H  | 2.45419200  | -3.05382300 | -2.18767700 |
| C  | 5.02783400  | -0.73392900 | -0.44590300 |
| C  | 3.85717600  | -0.95885900 | 1.70713900  |
| C  | 5.14043200  | -0.99813700 | -1.83833000 |
| H  | 4.25553200  | -2.00845300 | -3.51973200 |
| C  | 5.98656300  | 0.11573800  | 0.18978200  |
| C  | 4.75552100  | -0.13805200 | 2.30190900  |
| H  | 3.01382500  | -1.34366200 | 2.26962300  |
| C  | 6.23454600  | -0.41961300 | -2.57591900 |
| C  | 7.05967600  | 0.66989000  | -0.56091900 |
| C  | 5.86299500  | 0.41985800  | 1.57130500  |
| H  | 4.64707100  | 0.12617500  | 3.35000600  |

|    |             |             |             |
|----|-------------|-------------|-------------|
| C  | 7.15461100  | 0.36679800  | -1.96636200 |
| H  | 6.30614800  | -0.63451100 | -3.63836000 |
| C  | 7.98236300  | 1.50523900  | 0.07953800  |
| C  | 6.80556000  | 1.26086900  | 2.17393700  |
| H  | 7.97782100  | 0.79610000  | -2.53060900 |
| C  | 7.85469500  | 1.79621100  | 1.43390400  |
| H  | 8.80148900  | 1.92701600  | -0.49615400 |
| H  | 6.70605000  | 1.49370800  | 3.23034600  |
| H  | 8.57748100  | 2.44701900  | 1.91521500  |
| O  | -1.35206100 | -0.68393100 | 0.78134600  |
| O  | 0.24081200  | -1.89166100 | -0.82333600 |
| P  | -0.06136100 | -0.45258900 | -0.16575000 |
| O  | 1.02256500  | 0.18559700  | 0.58393100  |
| Br | 1.97391900  | -5.67743600 | 3.56039100  |
| N  | -0.58091300 | 0.37083800  | -1.54516200 |
| H  | -0.70061900 | 1.38725900  | -1.37801500 |
| S  | -1.21807200 | -0.17020400 | -2.96008700 |
| O  | -1.77183800 | -1.49802400 | -2.83467900 |
| O  | -1.96449600 | 0.93262500  | -3.53352000 |
| C  | 0.28474000  | -0.35726400 | -4.01477600 |
| F  | 1.20800500  | -1.05408000 | -3.37170500 |
| F  | 0.76880800  | 0.84019100  | -4.31557100 |
| F  | -0.06115300 | -0.98566400 | -5.12584300 |
| C  | -1.04719549 | 8.72601022  | -5.89690574 |
| C  | -1.11583565 | 7.78441026  | -4.86124170 |
| C  | -0.58721631 | 8.09032272  | -3.59993242 |
| C  | 0.01003917  | 9.33783685  | -3.37428589 |
| C  | 0.07867950  | 10.27943675 | -4.40994997 |
| C  | -0.44993624 | 9.97352276  | -5.67126040 |
| H  | -1.45080625 | 8.49243849  | -6.85994395 |
| H  | -1.57185432 | 6.83190590  | -5.03352756 |
| H  | 0.41365018  | 9.57140847  | -2.41124775 |
| H  | 0.53469789  | 11.23194122 | -4.23766403 |
| H  | -0.39752638 | 10.69245457 | -6.46201338 |
| C  | -0.65585244 | 7.14872106  | -2.56426966 |
| C  | -0.17710661 | 7.09490664  | -1.10156448 |
| C  | -1.18240415 | 5.70784665  | -2.42927249 |
| C  | -0.32469684 | 5.56305143  | -1.15845680 |
| H  | -0.84868378 | 7.56458072  | -0.41360346 |
| H  | 0.79484712  | 7.48776632  | -0.88739818 |
| H  | -2.23481425 | 5.65206621  | -2.24428190 |
| H  | -0.98362492 | 5.03391823  | -3.23624666 |
| C  | 0.14908706  | 4.52281100  | -0.43044876 |
| O  | -0.17537172 | 3.18141826  | -0.80500453 |

|   |            |            |            |
|---|------------|------------|------------|
| O | 0.89928476 | 4.74461116 | 0.60945017 |
| C | 1.39922291 | 3.64695470 | 1.37763774 |
| H | 1.51855409 | 3.94995681 | 2.39687755 |
| H | 0.70808948 | 2.83171382 | 1.32648211 |
| H | 2.34510474 | 3.33787009 | 0.98435125 |

**TS2R**

|    |             |             |             |
|----|-------------|-------------|-------------|
| C  | -3.94182900 | 0.07959100  | -0.07806800 |
| C  | -5.06217200 | -0.29933600 | 0.66374400  |
| C  | -5.20167200 | -1.62187400 | 1.05061700  |
| C  | -4.22654000 | -2.56179000 | 0.74490400  |
| C  | -3.06330500 | -2.18772700 | 0.06190900  |
| C  | -2.94300800 | -0.84706800 | -0.33686600 |
| C  | -5.02333200 | 2.06897300  | 0.60625000  |
| C  | -5.94748700 | 0.88492500  | 0.94788600  |
| H  | -4.34988100 | -3.59128800 | 1.06298300  |
| H  | -4.41624200 | 2.32206400  | 1.48122900  |
| H  | -5.56270400 | 2.96647500  | 0.29197400  |
| H  | -6.84194900 | 0.86303600  | 0.31342600  |
| C  | -4.08618700 | 1.52900000  | -0.51160100 |
| C  | -2.89138600 | 2.44041100  | -0.72852200 |
| C  | -4.78820700 | 1.64738900  | -1.89427700 |
| C  | -3.19360500 | 3.39136600  | -1.70900600 |
| C  | -1.65054600 | 2.46957600  | -0.11323900 |
| C  | -4.52739000 | 3.09703800  | -2.34549600 |
| H  | -4.30635600 | 0.95521900  | -2.59274100 |
| H  | -5.84986200 | 1.39290900  | -1.83810600 |
| C  | -2.27609300 | 4.38813600  | -1.99652000 |
| C  | -0.71393400 | 3.47315900  | -0.39551800 |
| H  | -5.29350600 | 3.78803700  | -1.97329500 |
| C  | -1.05100300 | 4.44655300  | -1.33790800 |
| H  | -0.34301700 | 5.23561700  | -1.56928200 |
| H  | -6.28987800 | 0.89570100  | 1.98596400  |
| H  | -4.49358300 | 3.20882600  | -3.43226100 |
| Br | -6.73633200 | -2.13933500 | 2.03220800  |
| C  | -1.95046800 | -3.16572200 | -0.08112300 |
| C  | -1.56131400 | -3.86225900 | 1.06844500  |
| C  | -1.25138600 | -3.38149700 | -1.28889700 |
| C  | -0.48229800 | -4.73292500 | 1.06307300  |
| H  | -2.08710600 | -3.66924100 | 1.99881100  |
| C  | -0.12868900 | -4.25952000 | -1.29194800 |
| C  | -1.64172800 | -2.77605200 | -2.53845800 |
| C  | 0.25660500  | -4.94073100 | -0.10453100 |
| H  | -0.18832000 | -5.23669200 | 1.97937400  |

|   |             |             |             |
|---|-------------|-------------|-------------|
| C | 0.61757800  | -4.47137500 | -2.49440500 |
| C | -0.93523500 | -2.97948700 | -3.67599000 |
| H | -2.52876000 | -2.15314300 | -2.55838600 |
| C | 1.41188700  | -5.80187700 | -0.12999300 |
| C | 1.74069900  | -5.34496000 | -2.49808400 |
| C | 0.22885200  | -3.82442900 | -3.69685900 |
| H | -1.24875900 | -2.51391000 | -4.60601400 |
| C | 2.12316300  | -5.98941900 | -1.26784000 |
| H | 1.69947400  | -6.29920000 | 0.79228400  |
| C | 2.43428800  | -5.56096900 | -3.69411500 |
| C | 0.96114300  | -4.05324900 | -4.86703600 |
| H | 2.99270100  | -6.64153600 | -1.27645800 |
| C | 2.04994300  | -4.91712300 | -4.86524600 |
| H | 3.27907700  | -6.24502000 | -3.69857500 |
| H | 0.66005100  | -3.55318400 | -5.78318800 |
| H | 2.60167600  | -5.09195000 | -5.78302300 |
| C | 0.58415500  | 3.51926700  | 0.33489800  |
| C | 0.54854600  | 3.74848400  | 1.71295900  |
| C | 1.82298800  | 3.35215100  | -0.31526300 |
| C | 1.71278300  | 3.85659700  | 2.45839700  |
| H | -0.41626100 | 3.85095200  | 2.19995800  |
| C | 3.01973000  | 3.44533300  | 0.45144000  |
| C | 1.93205300  | 3.05512700  | -1.72306100 |
| C | 2.96147200  | 3.71808000  | 1.84535900  |
| H | 1.66083600  | 4.04944900  | 3.52609800  |
| C | 4.29158600  | 3.26404600  | -0.17877900 |
| C | 3.13680900  | 2.87155700  | -2.31413800 |
| H | 1.01900800  | 2.94314400  | -2.29613900 |
| C | 4.19032400  | 3.84675100  | 2.58547100  |
| C | 5.48957400  | 3.37691200  | 0.58089700  |
| C | 4.36383600  | 2.96999900  | -1.56701600 |
| H | 3.19741400  | 2.63207800  | -3.37190900 |
| C | 5.39461600  | 3.68837300  | 1.98460700  |
| H | 4.12691200  | 4.07475100  | 3.64620500  |
| C | 6.72249300  | 3.18094500  | -0.05253300 |
| C | 5.61666200  | 2.77882600  | -2.16182400 |
| H | 6.31591700  | 3.78911800  | 2.55229900  |
| C | 6.78284500  | 2.88267400  | -1.40986500 |
| H | 7.63534000  | 3.26611800  | 0.53019800  |
| H | 5.66717800  | 2.54954700  | -3.22241000 |
| H | 7.74635000  | 2.73299700  | -1.88611600 |
| O | -1.78852000 | -0.41678300 | -0.96970100 |
| O | -1.27763300 | 1.41670400  | 0.72004300  |
| P | -0.56960100 | 0.20068100  | -0.09655000 |



|    |             |             |             |
|----|-------------|-------------|-------------|
| O  | 0.49952300  | 0.58681200  | -1.03602400 |
| Br | -2.68555300 | 5.67745800  | -3.32235400 |
| N  | -0.08820000 | -0.83378800 | 1.06364700  |
| H  | 1.68805700  | -1.42097200 | -1.75965800 |
| S  | -0.59230100 | -1.00851000 | 2.56550300  |
| O  | -2.03373000 | -0.90432800 | 2.74138800  |
| O  | 0.12311600  | -2.14083200 | 3.14374300  |
| C  | 0.10634000  | 0.46593800  | 3.45998700  |
| F  | -0.75277100 | 1.47463200  | 3.46007200  |
| F  | 1.23922600  | 0.85782700  | 2.88525800  |
| F  | 0.35889000  | 0.11794700  | 4.71768500  |
| C  | 3.49894400  | -1.35781500 | 4.52622000  |
| C  | 3.15171500  | -1.70173700 | 3.23058300  |
| C  | 3.52911900  | -0.86546000 | 2.16211200  |
| C  | 4.26393900  | 0.30992300  | 2.40333100  |
| C  | 4.62443500  | 0.63416300  | 3.70184900  |
| C  | 4.23842000  | -0.19572300 | 4.75674900  |
| H  | 3.19832100  | -1.98639000 | 5.35666900  |
| H  | 2.56352300  | -2.59174800 | 3.03440900  |
| H  | 4.53709800  | 0.95980500  | 1.57444100  |
| H  | 5.19176900  | 1.53682400  | 3.89623500  |
| H  | 4.51423800  | 0.06915800  | 5.77272100  |
| C  | 3.09451700  | -1.17712400 | 0.84019500  |
| C  | 2.23148500  | -2.15309900 | 0.30201800  |
| C  | 3.29393800  | -0.49141300 | -0.47822300 |
| C  | 2.53576300  | -1.70025100 | -1.13454500 |
| H  | 1.19309500  | -1.54077400 | 0.65366700  |
| H  | 2.04702500  | -3.16284400 | 0.66661500  |
| H  | 2.74388600  | 0.45231400  | -0.57409700 |
| H  | 4.34143200  | -0.34537800 | -0.76287500 |
| C  | 3.47804000  | -2.57209000 | -1.92342100 |
| O  | 3.56174600  | -2.57250000 | -3.12727800 |
| O  | 4.27613400  | -3.29681600 | -1.12249100 |
| C  | 5.26205800  | -4.08112000 | -1.79714300 |
| H  | 5.80076300  | -4.61813400 | -1.01902600 |
| H  | 4.77905200  | -4.77664400 | -2.48598100 |
| H  | 5.93982800  | -3.43590600 | -2.36008100 |

**TS2S**

|   |            |             |             |
|---|------------|-------------|-------------|
| C | 3.75603600 | 0.60986000  | 0.20013900  |
| C | 4.98991600 | 0.30845700  | -0.38422500 |
| C | 5.34924900 | -1.01435200 | -0.57663500 |
| C | 4.48265000 | -2.04562300 | -0.23756100 |
| C | 3.21344600 | -1.76066100 | 0.27195400  |

|    |             |             |             |
|----|-------------|-------------|-------------|
| C  | 2.86483700  | -0.41712700 | 0.47361700  |
| C  | 4.62667500  | 2.63279900  | -0.65796800 |
| C  | 5.73126900  | 1.56461100  | -0.76006900 |
| H  | 4.77253000  | -3.07750300 | -0.40303200 |
| H  | 4.06763200  | 2.67167000  | -1.59856800 |
| H  | 5.00579900  | 3.63439300  | -0.43890800 |
| H  | 6.55640400  | 1.75579600  | -0.06342400 |
| C  | 3.68222200  | 2.10688200  | 0.45839200  |
| C  | 2.37235700  | 2.87157000  | 0.50226700  |
| C  | 4.26616800  | 2.46864900  | 1.85569500  |
| C  | 2.48301700  | 3.95132000  | 1.38306400  |
| C  | 1.18401800  | 2.66576200  | -0.17824900 |
| C  | 3.79829500  | 3.91265900  | 2.11523200  |
| H  | 3.82468400  | 1.80191600  | 2.60359500  |
| H  | 5.35193300  | 2.34963900  | 1.89028800  |
| C  | 1.42783500  | 4.84017800  | 1.50481700  |
| C  | 0.08996400  | 3.53112000  | -0.02978500 |
| H  | 4.49411000  | 4.65179500  | 1.70025100  |
| C  | 0.24337800  | 4.64434900  | 0.80239700  |
| H  | -0.57945700 | 5.34163400  | 0.91894000  |
| H  | 6.16532300  | 1.49177000  | -1.76050100 |
| H  | 3.68019700  | 4.14213000  | 3.17720100  |
| Br | 7.03947500  | -1.41461300 | -1.33089300 |
| C  | 2.22983500  | -2.86213300 | 0.45342900  |
| C  | 1.95905900  | -3.67109800 | -0.65577300 |
| C  | 1.56614800  | -3.10725800 | 1.67280500  |
| C  | 1.01754400  | -4.68701300 | -0.59949000 |
| H  | 2.47421900  | -3.46552100 | -1.58945800 |
| C  | 0.61707100  | -4.16746100 | 1.74127600  |
| C  | 1.83433600  | -2.35283800 | 2.87261500  |
| C  | 0.32923300  | -4.95084100 | 0.59007300  |
| H  | 0.80609800  | -5.28133000 | -1.48380400 |
| C  | -0.04400400 | -4.46211900 | 2.97521400  |
| C  | 1.20581200  | -2.63193900 | 4.03900300  |
| H  | 2.56747500  | -1.55461500 | 2.82967400  |
| C  | -0.65561600 | -5.99847900 | 0.68145100  |
| C  | -0.98707800 | -5.52499400 | 3.04601800  |
| C  | 0.24309000  | -3.69762400 | 4.13738900  |
| H  | 1.42655200  | -2.05559200 | 4.93272300  |
| C  | -1.28234800 | -6.27373300 | 1.85130300  |
| H  | -0.87562500 | -6.57378900 | -0.21344300 |
| C  | -1.60506400 | -5.81175200 | 4.27017700  |
| C  | -0.40184900 | -4.01052200 | 5.33983600  |
| H  | -2.01652800 | -7.07186300 | 1.91204000  |

|    |             |             |             |
|----|-------------|-------------|-------------|
| C  | -1.31178700 | -5.06187600 | 5.40544200  |
| H  | -2.32034600 | -6.62756500 | 4.32212400  |
| H  | -0.17826900 | -3.42461500 | 6.22662900  |
| H  | -1.79789200 | -5.29646200 | 6.34672700  |
| C  | -1.19523600 | 3.26540100  | -0.73106200 |
| C  | -1.19261800 | 3.14184300  | -2.12236200 |
| C  | -2.40572500 | 3.11787900  | -0.01952400 |
| C  | -2.36381800 | 2.90963200  | -2.83046600 |
| H  | -0.24965300 | 3.22237000  | -2.65411600 |
| C  | -3.60847100 | 2.88266800  | -0.74472900 |
| C  | -2.47473400 | 3.14453800  | 1.42109900  |
| C  | -3.58561800 | 2.78389900  | -2.16333000 |
| H  | -2.33483200 | 2.81542600  | -3.91197800 |
| C  | -4.84999300 | 2.72680000  | -0.05005000 |
| C  | -3.65270500 | 3.01071400  | 2.07671500  |
| H  | -1.55488500 | 3.25070400  | 1.98386400  |
| C  | -4.81414400 | 2.52724300  | -2.87028300 |
| C  | -6.04801600 | 2.47060200  | -0.77271300 |
| C  | -4.88845700 | 2.80748700  | 1.36842500  |
| H  | -3.67939500 | 3.03007400  | 3.16283900  |
| C  | -5.98682700 | 2.37648800  | -2.20915900 |
| H  | -4.77532100 | 2.45449300  | -3.95340600 |
| C  | -7.24919200 | 2.31258700  | -0.07140400 |
| C  | -6.11091500 | 2.64452600  | 2.03192500  |
| H  | -6.90741400 | 2.18095700  | -2.75142400 |
| C  | -7.27882800 | 2.40075300  | 1.31666400  |
| H  | -8.16220200 | 2.11706900  | -0.62625500 |
| H  | -6.13582300 | 2.71030200  | 3.11637700  |
| H  | -8.21833500 | 2.27548100  | 1.84463400  |
| O  | 1.57787000  | -0.11721600 | 0.90215600  |
| O  | 1.05442900  | 1.52609300  | -0.96543900 |
| P  | 0.44053700  | 0.23556000  | -0.19857000 |
| O  | -0.84498800 | 0.42305900  | 0.49617800  |
| Br | 1.59388300  | 6.32268600  | 2.67101800  |
| N  | 0.37106100  | -0.88194900 | -1.39127600 |
| H  | -1.84099600 | -1.50798300 | -3.37576700 |
| S  | 1.22176200  | -1.04841500 | -2.73538900 |
| O  | 2.64831600  | -0.80701300 | -2.59081500 |
| O  | 0.75210400  | -2.26250700 | -3.39069200 |
| C  | 0.63922500  | 0.31410400  | -3.85677700 |
| F  | 1.34019500  | 1.42338300  | -3.67811200 |
| F  | -0.64935100 | 0.57491500  | -3.63635400 |
| F  | 0.78590900  | -0.08807900 | -5.11270700 |
| C  | -4.04861800 | -0.46374700 | 2.77437300  |

|   |             |             |             |
|---|-------------|-------------|-------------|
| C | -3.69928000 | -0.48206800 | 1.43401000  |
| C | -3.03114900 | -1.59815200 | 0.90425100  |
| C | -2.70793200 | -2.69176900 | 1.72523100  |
| C | -3.05049200 | -2.66198900 | 3.06841700  |
| C | -3.72243100 | -1.55189500 | 3.58644500  |
| H | -4.56751800 | 0.39521400  | 3.18688100  |
| H | -3.91523800 | 0.36652700  | 0.79088900  |
| H | -2.19598700 | -3.55329900 | 1.30282200  |
| H | -2.79899900 | -3.49757500 | 3.71292200  |
| H | -3.99192100 | -1.53542300 | 4.63789600  |
| C | -2.65262100 | -1.58731900 | -0.47282600 |
| C | -3.00273300 | -0.65373700 | -1.59408700 |
| C | -1.87600100 | -2.41620200 | -1.30004500 |
| C | -2.50597700 | -1.77921700 | -2.55817600 |
| H | -2.34375300 | 0.22277600  | -1.60213000 |
| H | -4.04720400 | -0.33988500 | -1.66730600 |
| H | -0.78801500 | -1.73023000 | -1.25950300 |
| H | -1.58564500 | -3.45271300 | -1.13445000 |
| C | -3.67900900 | -2.60011600 | -3.03937300 |
| O | -4.57949900 | -2.96958500 | -2.32025400 |
| O | -3.60710300 | -2.87043600 | -4.34283900 |
| C | -4.68621900 | -3.65546800 | -4.86394900 |
| H | -4.47293100 | -3.78686300 | -5.92217000 |
| H | -4.72888000 | -4.62027600 | -4.35602900 |
| H | -5.63394900 | -3.13338000 | -4.72266100 |

**PR**

|   |             |             |             |
|---|-------------|-------------|-------------|
| H | -2.08349200 | 0.34069300  | 1.94121200  |
| C | 3.75725600  | -1.38805400 | -0.25637300 |
| C | 2.40349400  | -1.29254200 | 0.03718300  |
| C | 1.78780200  | -0.03826000 | 0.14544200  |
| C | 2.55525400  | 1.11508600  | -0.04696300 |
| C | 3.91256600  | 1.01846600  | -0.34080000 |
| C | 4.51600000  | -0.23199000 | -0.44572200 |
| H | 4.22484900  | -2.36397200 | -0.33938200 |
| H | 1.81272300  | -2.19225400 | 0.18575100  |
| H | 2.08242300  | 2.09004200  | 0.03561000  |
| H | 4.49852800  | 1.92006500  | -0.48824000 |
| H | 5.57407400  | -0.30788400 | -0.67470900 |
| C | 0.36459700  | 0.07733700  | 0.45714800  |
| C | -0.63179400 | -0.78897100 | 0.70112900  |
| C | -0.51075600 | 1.30381100  | 0.64171100  |
| C | -1.66472300 | 0.30340500  | 0.93083300  |
| H | -0.71638400 | -1.86978300 | 0.73573800  |

|   |             |             |             |
|---|-------------|-------------|-------------|
| H | -0.25148000 | 1.94470300  | 1.48918400  |
| H | -0.67128800 | 1.91204000  | -0.25156700 |
| C | -2.78444400 | 0.29254400  | -0.08041800 |
| O | -2.82290100 | 0.93287400  | -1.10491000 |
| O | -3.73961700 | -0.57778400 | 0.27946500  |
| C | -4.82095900 | -0.71314900 | -0.64696300 |
| H | -5.50404400 | -1.43611000 | -0.20599100 |
| H | -5.31920100 | 0.24723100  | -0.79135400 |
| H | -4.45232200 | -1.07160000 | -1.60992500 |

**PS**

|   |             |             |             |
|---|-------------|-------------|-------------|
| H | 2.07848500  | -1.88478500 | -1.19078900 |
| C | -3.68168100 | -0.32919000 | 1.22060300  |
| C | -2.33934200 | -0.62510500 | 1.00112900  |
| C | -1.68534900 | -0.14903300 | -0.13992700 |
| C | -2.39952000 | 0.63095000  | -1.05944100 |
| C | -3.73868700 | 0.92580900  | -0.83971900 |
| C | -4.38364900 | 0.44582400  | 0.30124000  |
| H | -4.17942300 | -0.70422300 | 2.10913100  |
| H | -1.78974800 | -1.23008500 | 1.71727600  |
| H | -1.89729100 | 1.00269800  | -1.94830100 |
| H | -4.28399500 | 1.52988800  | -1.55779300 |
| H | -5.43038600 | 0.67633600  | 0.47126200  |
| C | -0.27739000 | -0.47472600 | -0.35825700 |
| C | 0.67822900  | -1.30500300 | 0.47395600  |
| C | 0.63476200  | -0.19919200 | -1.30355500 |
| C | 1.73687300  | -1.00259700 | -0.64460700 |
| H | 0.43167300  | -2.36550000 | 0.57616600  |
| H | 0.92940700  | -0.88887600 | 1.45373800  |
| H | 0.62620900  | 0.37795800  | -2.22191700 |
| C | 2.96052000  | -0.25101800 | -0.18141600 |
| O | 4.10083700  | -0.62294100 | -0.33688500 |
| O | 2.64133800  | 0.89011400  | 0.44630400  |
| C | 3.74983400  | 1.64111200  | 0.94608000  |
| H | 3.32271100  | 2.51915300  | 1.42615800  |
| H | 4.31790300  | 1.04831100  | 1.66586200  |
| H | 4.40945600  | 1.93475400  | 0.12733600  |

**M06-2X/SMD**

**React**

|   |            |             |             |
|---|------------|-------------|-------------|
| C | 2.82088900 | 0.43033200  | -1.11709800 |
| C | 1.68768200 | -0.37231900 | -1.21346800 |
| C | 0.97917400 | -0.74323000 | -0.06474800 |
| C | 1.43719300 | -0.30419800 | 1.18483100  |

|   |             |             |             |
|---|-------------|-------------|-------------|
| C | 2.56901200  | 0.49863600  | 1.27659900  |
| C | 3.26471200  | 0.87064400  | 0.12722900  |
| H | 3.36022200  | 0.70740600  | -2.01764100 |
| H | 1.35357800  | -0.72406600 | -2.18480700 |
| H | 0.90728000  | -0.58935400 | 2.08802200  |
| H | 2.90968300  | 0.83395100  | 2.25127300  |
| H | 4.15002200  | 1.49393100  | 0.20247000  |
| C | -0.24421000 | -1.55741200 | -0.18695600 |
| C | -1.18494400 | -1.60210400 | -1.34217400 |
| C | -1.14629600 | -2.08314000 | 0.87859300  |
| C | -1.66938500 | -1.03517200 | -0.04532200 |
| H | -1.59699900 | -2.56209000 | -1.65068600 |
| H | -1.00608900 | -0.89272600 | -2.14588400 |
| H | -1.54220500 | -3.09201000 | 0.76931200  |
| H | -0.95140100 | -1.76996900 | 1.90062400  |
| C | -1.83687100 | 0.37155500  | 0.32653600  |
| O | -1.85852500 | 0.77692900  | 1.46950900  |
| O | -1.90400400 | 1.17032400  | -0.74817100 |
| C | -1.94604200 | 2.57001000  | -0.45599100 |
| H | -1.99718900 | 3.07324500  | -1.42024800 |
| H | -2.82607800 | 2.80941500  | 0.14463000  |
| H | -1.04607500 | 2.87261900  | 0.08404500  |

**CBA**

|   |             |             |             |
|---|-------------|-------------|-------------|
| C | -2.09387800 | -2.03131000 | 0.55410100  |
| C | -3.16743900 | -2.80005500 | 0.08704100  |
| C | -4.31616100 | -2.16878600 | -0.35743000 |
| C | -4.41329900 | -0.78137300 | -0.36617900 |
| C | -3.32975500 | 0.00323000  | 0.03620900  |
| C | -2.16522800 | -0.64985900 | 0.47242100  |
| C | -1.30416100 | -4.24812000 | 0.30680600  |
| C | -2.83068200 | -4.26746700 | 0.11293800  |
| H | -5.32179000 | -0.29813800 | -0.70972600 |
| H | -0.81101200 | -4.16048900 | -0.66682000 |
| H | -0.91714900 | -5.13817200 | 0.80927600  |
| H | -3.34530500 | -4.76805900 | 0.94187800  |
| C | -1.02977700 | -2.95419300 | 1.12430700  |
| C | 0.44695000  | -2.60643800 | 1.13152500  |
| C | -1.26591000 | -3.22573500 | 2.63790800  |
| C | 1.06726700  | -3.22009400 | 2.22388500  |
| C | 1.20966400  | -1.86800000 | 0.24284500  |
| C | 0.04845300  | -3.85953500 | 3.12959300  |
| H | -1.42359300 | -2.26881300 | 3.14657600  |
| H | -2.14303800 | -3.85509100 | 2.80825200  |

|    |             |             |             |
|----|-------------|-------------|-------------|
| C  | 2.44498500  | -3.14581000 | 2.34750600  |
| C  | 2.60215400  | -1.76602000 | 0.36202300  |
| H  | 0.05146900  | -4.94898600 | 3.00437100  |
| C  | 3.21188800  | -2.44529100 | 1.42309800  |
| H  | 4.29080200  | -2.40528600 | 1.52894000  |
| H  | -3.13682600 | -4.76934800 | -0.80888000 |
| H  | 0.25291800  | -3.65336600 | 4.18338300  |
| Br | -5.76920900 | -3.21351900 | -0.97721300 |
| C  | -3.40250700 | 1.48531600  | -0.07982300 |
| C  | -3.71225500 | 2.03610700  | -1.33054900 |
| C  | -3.16762000 | 2.34033700  | 1.01857600  |
| C  | -3.75551200 | 3.40937700  | -1.52778900 |
| H  | -3.89421600 | 1.36804800  | -2.16765200 |
| C  | -3.21712000 | 3.75030100  | 0.81803400  |
| C  | -2.90757900 | 1.84806600  | 2.34948600  |
| C  | -3.50374600 | 4.28679100  | -0.46726000 |
| H  | -3.97984800 | 3.81076400  | -2.51169500 |
| C  | -2.97823400 | 4.63939800  | 1.91237300  |
| C  | -2.68972200 | 2.69329800  | 3.38493900  |
| H  | -2.90248700 | 0.77666600  | 2.51954500  |
| C  | -3.53130900 | 5.71575700  | -0.64415700 |
| C  | -3.01370300 | 6.04633500  | 1.71056800  |
| C  | -2.70669500 | 4.12089100  | 3.20617200  |
| H  | -2.50036900 | 2.30288000  | 4.38094000  |
| C  | -3.29620400 | 6.55432300  | 0.39292200  |
| H  | -3.74638000 | 6.10409300  | -1.63558200 |
| C  | -2.77443900 | 6.89824100  | 2.79539000  |
| C  | -2.47519500 | 5.00586700  | 4.26561400  |
| H  | -3.31782100 | 7.63119600  | 0.25096100  |
| C  | -2.50786200 | 6.38124200  | 4.05922200  |
| H  | -2.79972000 | 7.97271100  | 2.63697100  |
| H  | -2.26849400 | 4.60425900  | 5.25360900  |
| H  | -2.32448400 | 7.05563100  | 4.88956200  |
| C  | 3.41202200  | -1.00547700 | -0.62594600 |
| C  | 3.27028300  | -1.31641500 | -1.98168500 |
| C  | 4.33177700  | -0.01082900 | -0.22821700 |
| C  | 4.04772100  | -0.69893700 | -2.94937000 |
| H  | 2.53846700  | -2.06139900 | -2.27782800 |
| C  | 5.14428600  | 0.60977100  | -1.22022200 |
| C  | 4.46125300  | 0.43956000  | 1.13676300  |
| C  | 5.00538800  | 0.25438200  | -2.58979800 |
| H  | 3.92038400  | -0.95940100 | -3.99608700 |
| C  | 6.10528000  | 1.60079400  | -0.84579800 |
| C  | 5.36733300  | 1.38400700  | 1.48718000  |

|    |             |             |             |
|----|-------------|-------------|-------------|
| H  | 3.79822000  | 0.02661200  | 1.88873300  |
| C  | 5.84859600  | 0.88897700  | -3.57005200 |
| C  | 6.93028000  | 2.20639300  | -1.83358400 |
| C  | 6.23744800  | 1.98871700  | 0.51420900  |
| H  | 5.44157100  | 1.71568400  | 2.51916000  |
| C  | 6.76924700  | 1.81465200  | -3.21041400 |
| H  | 5.72608700  | 0.60264500  | -4.61092200 |
| C  | 7.87050500  | 3.16736700  | -1.44318800 |
| C  | 7.18767100  | 2.95591800  | 0.86347800  |
| H  | 7.40325800  | 2.28605100  | -3.95630800 |
| C  | 7.99749800  | 3.53586600  | -0.10738500 |
| H  | 8.50077400  | 3.62600500  | -2.20009000 |
| H  | 7.28253200  | 3.25084500  | 1.90485000  |
| H  | 8.73027800  | 4.28397000  | 0.17805900  |
| O  | -1.04639800 | 0.12194100  | 0.78645700  |
| O  | 0.54479400  | -1.14752100 | -0.75974600 |
| P  | 0.10695500  | 0.32911400  | -0.31917400 |
| O  | 1.13116300  | 1.25391200  | 0.16988400  |
| Br | 3.29213900  | -4.00677600 | 3.80728500  |
| N  | -0.73896500 | 0.77084000  | -1.72219500 |
| H  | -1.25721600 | 1.65276600  | -1.67159200 |
| S  | -0.58895700 | 0.22614600  | -3.27576500 |
| O  | -1.16526000 | 1.24935000  | -4.12105000 |
| O  | 0.71526200  | -0.34351600 | -3.51219400 |
| C  | -1.77965800 | -1.18438300 | -3.32254300 |
| F  | -2.99929600 | -0.74397900 | -3.05452500 |
| F  | -1.43784900 | -2.11024900 | -2.44333400 |
| F  | -1.75042100 | -1.69478900 | -4.54329800 |

**M1**

|   |             |             |             |
|---|-------------|-------------|-------------|
| C | -2.51835100 | -2.64755400 | 0.04133000  |
| C | -3.58367500 | -3.19126400 | -0.68345000 |
| C | -4.60538900 | -2.36302800 | -1.11244200 |
| C | -4.59078100 | -1.00390700 | -0.82477700 |
| C | -3.51030900 | -0.43260000 | -0.14288100 |
| C | -2.45397400 | -1.27698500 | 0.23888900  |
| C | -1.90183600 | -4.85475300 | -0.54830100 |
| C | -3.38480900 | -4.66569600 | -0.91377100 |
| H | -5.41803200 | -0.37248800 | -1.13066700 |
| H | -1.28051100 | -4.64021600 | -1.42407300 |
| H | -1.66399900 | -5.86038000 | -0.19160400 |
| H | -4.04750700 | -5.25184400 | -0.26556900 |
| C | -1.62630500 | -3.77327000 | 0.53308500  |
| C | -0.14259600 | -3.59002000 | 0.77643100  |



|    |             |             |             |
|----|-------------|-------------|-------------|
| C  | -2.08645900 | -4.28319000 | 1.92997500  |
| C  | 0.27500800  | -4.42748600 | 1.81472100  |
| C  | 0.78474800  | -2.79961900 | 0.11883200  |
| C  | -0.90184700 | -5.11337100 | 2.45595400  |
| H  | -2.24472100 | -3.41947200 | 2.58448900  |
| H  | -3.02147300 | -4.84622600 | 1.87213300  |
| C  | 1.62277700  | -4.49898700 | 2.12599800  |
| C  | 2.15068000  | -2.86048400 | 0.42317900  |
| H  | -0.95782600 | -6.16001200 | 2.13290200  |
| C  | 2.55836500  | -3.73923200 | 1.43299700  |
| H  | 3.61266700  | -3.81203900 | 1.67908200  |
| H  | -3.60805700 | -4.94693800 | -1.94612600 |
| H  | -0.83133200 | -5.11397600 | 3.54669700  |
| Br | -6.04862100 | -3.10051200 | -2.09399800 |
| C  | -3.52479400 | 1.02982700  | 0.13322600  |
| C  | -3.79934900 | 1.90192100  | -0.92663200 |
| C  | -3.34364100 | 1.55057300  | 1.43400600  |
| C  | -3.87378800 | 3.27355400  | -0.73585800 |
| H  | -3.93486200 | 1.49006900  | -1.92230700 |
| C  | -3.39417800 | 2.96176400  | 1.62548000  |
| C  | -3.13717900 | 0.71712000  | 2.59391700  |
| C  | -3.66248600 | 3.82775300  | 0.53044600  |
| H  | -4.07851400 | 3.93050300  | -1.57699400 |
| C  | -3.16153300 | 3.52171900  | 2.92148300  |
| C  | -2.93286600 | 1.24892500  | 3.82356000  |
| H  | -3.15881100 | -0.36063700 | 2.47631500  |
| C  | -3.67619400 | 5.25205300  | 0.74654600  |
| C  | -3.16061700 | 4.93250900  | 3.10226500  |
| C  | -2.91436800 | 2.67181100  | 4.03243300  |
| H  | -2.77919400 | 0.60091400  | 4.68203400  |
| C  | -3.42749900 | 5.77971300  | 1.96884100  |
| H  | -3.87858400 | 5.89527400  | -0.10583900 |
| C  | -2.90158100 | 5.45852200  | 4.37330200  |
| C  | -2.66392000 | 3.23664300  | 5.28900600  |
| H  | -3.42700100 | 6.85559900  | 2.12003400  |
| C  | -2.65418500 | 4.61770100  | 5.45437900  |
| H  | -2.89714400 | 6.53674600  | 4.50656000  |
| H  | -2.47512600 | 2.58092600  | 6.13449200  |
| H  | -2.45551300 | 5.04262100  | 6.43320200  |
| C  | 3.15984700  | -2.07343300 | -0.33488800 |
| C  | 3.26427200  | -2.28101400 | -1.71309900 |
| C  | 4.04553300  | -1.18594500 | 0.30946200  |
| C  | 4.25551200  | -1.66435800 | -2.46279900 |
| H  | 2.56370700  | -2.95554500 | -2.19646800 |

|    |             |             |             |
|----|-------------|-------------|-------------|
| C  | 5.07800100  | -0.57042200 | -0.45340100 |
| C  | 3.93415800  | -0.85058300 | 1.70820800  |
| C  | 5.18853700  | -0.82120700 | -1.84880300 |
| H  | 4.32567000  | -1.84913700 | -3.53112600 |
| C  | 6.00808800  | 0.31282300  | 0.17953600  |
| C  | 4.80871300  | -0.00343100 | 2.30182900  |
| H  | 3.11435300  | -1.27141200 | 2.27975700  |
| C  | 6.25245200  | -0.19557500 | -2.59217900 |
| C  | 7.04957800  | 0.91680400  | -0.57819000 |
| C  | 5.88649600  | 0.60217100  | 1.56492500  |
| H  | 4.70220700  | 0.24691000  | 3.35364400  |
| C  | 7.14312100  | 0.62686800  | -1.98658800 |
| H  | 6.32289700  | -0.40223800 | -3.65645100 |
| C  | 7.94444600  | 1.78460000  | 0.05989500  |
| C  | 6.80100400  | 1.47576100  | 2.16511400  |
| H  | 7.94284900  | 1.09340100  | -2.55512000 |
| C  | 7.81989200  | 2.05882100  | 1.41824600  |
| H  | 8.73918100  | 2.24387400  | -0.52129000 |
| H  | 6.70285900  | 1.69628000  | 3.22442600  |
| H  | 8.52094500  | 2.73454400  | 1.89788400  |
| O  | -1.29968800 | -0.71418700 | 0.78599900  |
| O  | 0.32456800  | -1.86891500 | -0.82018800 |
| P  | -0.03607100 | -0.43547000 | -0.18267000 |
| O  | 1.02636300  | 0.27278400  | 0.53432700  |
| Br | 2.19234400  | -5.64559100 | 3.52306000  |
| N  | -0.61517500 | 0.34320300  | -1.56417100 |
| H  | -0.74446100 | 1.36257500  | -1.42410500 |
| S  | -1.26855300 | -0.24249600 | -2.95193200 |
| O  | -1.76735700 | -1.58838100 | -2.79324200 |
| O  | -2.07054200 | 0.82069900  | -3.52478900 |
| C  | 0.21331600  | -0.38721500 | -4.04091800 |
| F  | 1.17849500  | -1.03922900 | -3.41260900 |
| F  | 0.64254900  | 0.82218300  | -4.37383900 |
| F  | -0.13571600 | -1.04738700 | -5.13369600 |
| C  | 3.92163300  | 3.86670000  | -1.06557300 |
| C  | 2.82076800  | 4.71767900  | -1.11177700 |
| C  | 1.64426100  | 4.31654500  | -1.75478600 |
| C  | 1.59931200  | 3.05596000  | -2.36482500 |
| C  | 2.69501800  | 2.20266700  | -2.30372600 |
| C  | 3.86037300  | 2.60739700  | -1.65615200 |
| H  | 4.83085900  | 4.18536000  | -0.56442600 |
| H  | 2.87414300  | 5.70052100  | -0.65345900 |
| H  | 0.70386900  | 2.74561100  | -2.89339300 |
| H  | 2.64192600  | 1.21942000  | -2.76222800 |

|   |             |            |             |
|---|-------------|------------|-------------|
| H | 4.71969900  | 1.94720600 | -1.62197400 |
| C | 0.44696100  | 5.17665400 | -1.72624200 |
| C | 0.09640700  | 6.21576400 | -0.71030800 |
| C | -0.91987100 | 4.87361900 | -2.23674200 |
| C | -0.72035800 | 4.96663500 | -0.75993500 |
| H | -0.37598700 | 7.13801400 | -1.04585700 |
| H | 0.76904500  | 6.32115800 | 0.13682000  |
| H | -1.48683100 | 5.67580500 | -2.70767100 |
| H | -1.10118500 | 3.88163200 | -2.64257500 |
| C | -0.61439500 | 3.80421300 | 0.11718600  |
| O | -0.77656900 | 2.65615500 | -0.26434300 |
| O | -0.25137700 | 4.10978300 | 1.35646400  |
| C | 0.08349300  | 2.98641500 | 2.19025600  |
| H | 0.21513500  | 3.39655000 | 3.19080700  |
| H | -0.71737400 | 2.24480900 | 2.17601500  |
| H | 1.00288800  | 2.52232500 | 1.82712500  |

**TS1**

|   |            |             |             |
|---|------------|-------------|-------------|
| C | 4.04162600 | -0.52701700 | -0.02956800 |
| C | 5.04078800 | -1.11566300 | -0.80885900 |
| C | 4.93965800 | -2.45862800 | -1.13430000 |
| C | 3.84460700 | -3.21533500 | -0.73242400 |
| C | 2.80685100 | -2.62800700 | -0.00142600 |
| C | 2.92959700 | -1.26935200 | 0.33222700  |
| C | 5.36950200 | 1.22892600  | -0.88765700 |
| C | 6.08198900 | -0.10045200 | -1.19962300 |
| H | 3.77679300 | -4.26315700 | -1.00528000 |
| H | 4.75529300 | 1.52113300  | -1.74560200 |
| H | 6.05630100 | 2.04803700  | -0.65849100 |
| H | 6.99226100 | -0.22974500 | -0.60142600 |
| C | 4.43027900 | 0.90239900  | 0.30951600  |
| C | 3.40469600 | 2.00383000  | 0.52844200  |
| C | 5.22575700 | 0.98631000  | 1.64306400  |
| C | 3.91831800 | 2.95337000  | 1.41891300  |
| C | 2.15060500 | 2.20733500  | -0.02554800 |
| C | 5.22242900 | 2.48262900  | 2.00817800  |
| H | 4.68684000 | 0.42118200  | 2.41089700  |
| H | 6.22998000 | 0.56539000  | 1.54619600  |
| C | 3.20185900 | 4.11293600  | 1.66599100  |
| C | 1.42559900 | 3.38626900  | 0.20004500  |
| H | 6.06500900 | 3.01787500  | 1.55392300  |
| C | 1.97527600 | 4.34808900  | 1.04974000  |
| H | 1.43452900 | 5.26986000  | 1.23727200  |
| H | 6.36779000 | -0.19340100 | -2.25060100 |

|    |             |             |             |
|----|-------------|-------------|-------------|
| H  | 5.26963000  | 2.65897500  | 3.08589300  |
| Br | 6.31429300  | -3.26852600 | -2.15985300 |
| C  | 1.55462200  | -3.38381500 | 0.27443100  |
| C  | 0.91023600  | -3.98124300 | -0.81377300 |
| C  | 0.95415800  | -3.43672200 | 1.55062200  |
| C  | -0.34250500 | -4.56249700 | -0.68730700 |
| H  | 1.37508200  | -3.92290900 | -1.79379500 |
| C  | -0.33126700 | -4.03629200 | 1.68440600  |
| C  | 1.59397700  | -2.92459500 | 2.73779300  |
| C  | -0.99043400 | -4.58742200 | 0.55125500  |
| H  | -0.84263200 | -4.97179400 | -1.55986500 |
| C  | -0.97638400 | -4.07661400 | 2.96158500  |
| C  | 0.98782500  | -2.97531200 | 3.94782800  |
| H  | 2.58959400  | -2.50226600 | 2.64962300  |
| C  | -2.30506500 | -5.15637100 | 0.70850400  |
| C  | -2.27126700 | -4.65189700 | 3.09166800  |
| C  | -0.32653900 | -3.54042500 | 4.10559300  |
| H  | 1.48953200  | -2.58834900 | 4.83034400  |
| C  | -2.91521300 | -5.18948000 | 1.91874300  |
| H  | -2.79576700 | -5.55528600 | -0.17414500 |
| C  | -2.88513600 | -4.67518000 | 4.34992000  |
| C  | -0.97339500 | -3.58607700 | 5.34643200  |
| H  | -3.90422000 | -5.62625900 | 2.03016300  |
| C  | -2.24067600 | -4.14742800 | 5.46453400  |
| H  | -3.87481600 | -5.11318300 | 4.44602300  |
| H  | -0.47166300 | -3.17572000 | 6.21834400  |
| H  | -2.73010800 | -4.17478100 | 6.43294700  |
| C  | 0.14240700  | 3.62055200  | -0.52628000 |
| C  | 0.21533900  | 3.83615800  | -1.90586400 |
| C  | -1.11179800 | 3.62343900  | 0.11575200  |
| C  | -0.92297600 | 4.06166100  | -2.66539500 |
| H  | 1.18935600  | 3.82266700  | -2.38569700 |
| C  | -2.28487700 | 3.83440100  | -0.66614000 |
| C  | -1.26418500 | 3.39008400  | 1.53163500  |
| C  | -2.18649300 | 4.05955100  | -2.06614800 |
| H  | -0.84054500 | 4.22806300  | -3.73589100 |
| C  | -3.57509700 | 3.80559000  | -0.04720500 |
| C  | -2.48674400 | 3.36266500  | 2.11425400  |
| H  | -0.37407900 | 3.20281000  | 2.12146100  |
| C  | -3.39020600 | 4.26202400  | -2.83131700 |
| C  | -4.74797700 | 4.00798300  | -0.82741000 |
| C  | -3.69027400 | 3.56561400  | 1.34911800  |
| H  | -2.58241600 | 3.17426500  | 3.17991000  |
| C  | -4.61009000 | 4.23813400  | -2.24316200 |

|    |             |             |             |
|----|-------------|-------------|-------------|
| H  | -3.29326100 | 4.43400900  | -3.89972100 |
| C  | -6.00083100 | 3.97496800  | -0.20070700 |
| C  | -4.96177600 | 3.53114200  | 1.93554200  |
| H  | -5.51215500 | 4.39181400  | -2.82900100 |
| C  | -6.10376500 | 3.73843200  | 1.16720300  |
| H  | -6.89417700 | 4.13595800  | -0.79814400 |
| H  | -5.04545100 | 3.34438400  | 3.00249400  |
| H  | -7.08167500 | 3.71226900  | 1.63777900  |
| O  | 1.90163700  | -0.63295200 | 1.00995100  |
| O  | 1.55111100  | 1.18055400  | -0.75272300 |
| P  | 0.73951100  | 0.12105000  | 0.17577400  |
| O  | -0.21401800 | 0.68897500  | 1.14945500  |
| Br | 3.90778400  | 5.39976000  | 2.86707900  |
| N  | 0.04748700  | -0.88347700 | -0.90693500 |
| H  | -1.36440400 | -1.00194900 | -0.64165000 |
| S  | 0.38490900  | -1.09531000 | -2.45631600 |
| O  | 1.80624300  | -1.11362200 | -2.76209000 |
| O  | -0.47946500 | -2.15431600 | -2.95956200 |
| C  | -0.29333600 | 0.44839800  | -3.25571300 |
| F  | 0.68282600  | 1.30074100  | -3.52880500 |
| F  | -1.17198200 | 1.03190500  | -2.44480900 |
| F  | -0.90698600 | 0.11886900  | -4.38680200 |
| C  | -7.39701500 | 0.03431700  | -0.19927000 |
| C  | -6.03399100 | 0.23182600  | -0.00784100 |
| C  | -5.20134200 | -0.85496000 | 0.28160700  |
| C  | -5.74271400 | -2.14325800 | 0.38069200  |
| C  | -7.10291200 | -2.33495200 | 0.17203700  |
| C  | -7.93091300 | -1.24918100 | -0.11466100 |
| H  | -8.03834100 | 0.88365800  | -0.41215000 |
| H  | -5.61652400 | 1.23368800  | -0.05712300 |
| H  | -5.10478500 | -2.99448400 | 0.59673100  |
| H  | -7.51977400 | -3.33449200 | 0.23638700  |
| H  | -8.99396700 | -1.40612800 | -0.26775200 |
| C  | -3.77235200 | -0.57847800 | 0.52449800  |
| C  | -3.02484700 | 0.41728700  | -0.22322400 |
| C  | -2.77955100 | -1.53187600 | 0.98159900  |
| C  | -2.59837800 | -1.07944800 | -0.51063900 |
| H  | -2.20572500 | 0.94729400  | 0.26044100  |
| H  | -3.54748400 | 0.94379200  | -1.01726600 |
| H  | -1.94111100 | -1.16351200 | 1.57018900  |
| H  | -3.09157100 | -2.55410800 | 1.17626500  |
| C  | -3.12973500 | -1.88084500 | -1.65246300 |
| O  | -3.40127000 | -3.05601400 | -1.59317000 |
| O  | -3.20972600 | -1.12367500 | -2.74505500 |

|   |             |             |             |
|---|-------------|-------------|-------------|
| C | -3.51376600 | -1.82783100 | -3.95536500 |
| H | -3.54502200 | -1.07132600 | -4.73717100 |
| H | -2.72723700 | -2.55711700 | -4.15768400 |
| H | -4.47926000 | -2.33003600 | -3.86990700 |

### B3LYP/IEF-PCM

#### React

|   |             |             |             |
|---|-------------|-------------|-------------|
| C | 2.82038500  | 1.05052800  | -1.02215500 |
| C | 1.71008200  | 0.23476500  | -1.23459000 |
| C | 1.18811200  | -0.55276300 | -0.19368600 |
| C | 1.82993900  | -0.52077600 | 1.05676600  |
| C | 2.93931500  | 0.29645200  | 1.26594000  |
| C | 3.43823600  | 1.08868500  | 0.22948700  |
| H | 3.20732300  | 1.65203900  | -1.83950700 |
| H | 1.25065000  | 0.20054300  | -2.21714400 |
| H | 1.46336900  | -1.14227400 | 1.86710500  |
| H | 3.41856900  | 0.30915100  | 2.24043800  |
| H | 4.30585600  | 1.72072700  | 0.39273000  |
| C | 0.01007100  | -1.40581700 | -0.41813500 |
| C | -0.96706200 | -1.40068300 | -1.55528200 |
| C | -0.78602300 | -2.22077700 | 0.55595700  |
| C | -1.49102300 | -1.11966200 | -0.17693400 |
| H | -1.24124400 | -2.35054200 | -2.01863900 |
| H | -0.92821300 | -0.56168700 | -2.24510700 |
| H | -1.04033200 | -3.25009000 | 0.29599100  |
| H | -0.60470900 | -2.05662700 | 1.61515600  |
| C | -2.02207300 | 0.11235400  | 0.40899800  |
| O | -2.15044800 | 0.30983900  | 1.60574600  |
| O | -2.34554300 | 1.01984500  | -0.54065300 |
| C | -2.83513200 | 2.28036900  | -0.04824000 |
| H | -3.05397600 | 2.87595400  | -0.93367700 |
| H | -3.73943900 | 2.13489000  | 0.54700700  |
| H | -2.07888100 | 2.77438300  | 0.56614000  |

#### CBA

|   |             |             |             |
|---|-------------|-------------|-------------|
| C | -1.92107500 | -2.15695200 | 0.51629400  |
| C | -2.90375500 | -3.04578900 | 0.04588600  |
| C | -4.10731800 | -2.54603700 | -0.43107500 |
| C | -4.34900700 | -1.17495100 | -0.46666100 |
| C | -3.35840900 | -0.26622500 | -0.06750100 |
| C | -2.13268700 | -0.78725700 | 0.39284900  |
| C | -0.91300400 | -4.30354900 | 0.37623000  |
| C | -2.42584900 | -4.47378100 | 0.12580100  |
| H | -5.30036700 | -0.79907100 | -0.82404000 |

|    |             |             |             |
|----|-------------|-------------|-------------|
| H  | -0.39120400 | -4.20205600 | -0.58081300 |
| H  | -0.46574700 | -5.14135000 | 0.91638500  |
| H  | -2.92126000 | -5.00740300 | 0.94675300  |
| C  | -0.79223700 | -2.95668300 | 1.16421800  |
| C  | 0.65624700  | -2.48160600 | 1.23279800  |
| C  | -1.08107700 | -3.20494900 | 2.68376700  |
| C  | 1.26902700  | -3.01491800 | 2.37792700  |
| C  | 1.40998700  | -1.71113500 | 0.35370300  |
| C  | 0.26018500  | -3.70049000 | 3.26368500  |
| H  | -1.35612200 | -2.25469600 | 3.15285600  |
| H  | -1.90455600 | -3.90595200 | 2.83927600  |
| C  | 2.63392800  | -2.84056400 | 2.56094600  |
| C  | 2.79514100  | -1.52747500 | 0.52009700  |
| H  | 0.35804400  | -4.79153700 | 3.19671300  |
| C  | 3.39559600  | -2.12953700 | 1.63797800  |
| H  | 4.46359700  | -2.02323200 | 1.78487800  |
| H  | -2.64802400 | -5.03056000 | -0.78906200 |
| H  | 0.39332000  | -3.43759900 | 4.31698500  |
| Br | -5.45504500 | -3.75310800 | -1.05270700 |
| C  | -3.60879600 | 1.19839500  | -0.20820700 |
| C  | -3.90483600 | 1.70057800  | -1.48677600 |
| C  | -3.58943500 | 2.08595800  | 0.89838900  |
| C  | -4.14276000 | 3.05398800  | -1.70448100 |
| H  | -3.93599100 | 1.01200100  | -2.32564700 |
| C  | -3.83595300 | 3.47910500  | 0.67655700  |
| C  | -3.36237900 | 1.64519100  | 2.24890200  |
| C  | -4.10620700 | 3.96618100  | -0.63973600 |
| H  | -4.35495900 | 3.41116700  | -2.70784500 |
| C  | -3.81694300 | 4.39501000  | 1.77331200  |
| C  | -3.35102200 | 2.51924900  | 3.29258000  |
| H  | -3.20775600 | 0.58855300  | 2.43364100  |
| C  | -4.33734700 | 5.37128700  | -0.83334400 |
| C  | -4.05049400 | 5.78746800  | 1.55139100  |
| C  | -3.56717400 | 3.92451500  | 3.09739800  |
| H  | -3.17925000 | 2.15863600  | 4.30299600  |
| C  | -4.30873300 | 6.24159300  | 0.21256400  |
| H  | -4.53633500 | 5.72552600  | -1.84081100 |
| C  | -4.02219100 | 6.66816000  | 2.64494100  |
| C  | -3.55058100 | 4.84178600  | 4.16108000  |
| H  | -4.48425800 | 7.30163700  | 0.05152000  |
| C  | -3.77421200 | 6.19835300  | 3.93390700  |
| H  | -4.19695300 | 7.72683400  | 2.47482100  |
| H  | -3.36005500 | 4.48062900  | 5.16781500  |
| H  | -3.75618100 | 6.89463100  | 4.76683600  |

|           |             |             |             |
|-----------|-------------|-------------|-------------|
| C         | 3.63417500  | -0.78499500 | -0.46327000 |
| C         | 3.66537100  | -1.23576900 | -1.79037500 |
| C         | 4.44679100  | 0.31305800  | -0.08068500 |
| C         | 4.49934100  | -0.65554400 | -2.73710800 |
| H         | 3.03109800  | -2.06723200 | -2.07839900 |
| C         | 5.31640800  | 0.90499000  | -1.05247300 |
| C         | 4.42206500  | 0.88654100  | 1.23962000  |
| C         | 5.34512200  | 0.40867200  | -2.39163500 |
| H         | 4.50594200  | -1.03256600 | -3.75565000 |
| C         | 6.16302800  | 1.99813600  | -0.69015900 |
| C         | 5.22581400  | 1.93130000  | 1.58087700  |
| H         | 3.73083000  | 0.48352000  | 1.96992900  |
| C         | 6.23528000  | 1.01467000  | -3.34318300 |
| C         | 7.04221300  | 2.57865500  | -1.65656000 |
| C         | 6.13464300  | 2.51921000  | 0.63859100  |
| H         | 5.18036300  | 2.34755900  | 2.58356200  |
| C         | 7.04803900  | 2.04865300  | -2.99243200 |
| H         | 6.24483300  | 0.62576700  | -4.35767100 |
| C         | 7.86976800  | 3.64718900  | -1.27386700 |
| C         | 6.97850100  | 3.59063800  | 0.97531900  |
| H         | 7.71673800  | 2.49599200  | -3.72286300 |
| C         | 7.83710100  | 4.14506900  | 0.02790700  |
| H         | 8.53922500  | 4.08580600  | -2.00874600 |
| H         | 6.95273700  | 3.98590000  | 1.98709900  |
| H         | 8.48339800  | 4.97269400  | 0.30466900  |
| O         | -1.09881800 | 0.11148900  | 0.69623900  |
| O         | 0.73919900  | -1.06365300 | -0.70557700 |
| P         | 0.10926700  | 0.38065200  | -0.35421800 |
| O         | 1.00264600  | 1.43358400  | 0.15807500  |
| Br        | 3.48528000  | -3.58867300 | 4.10292800  |
| N         | -0.70240100 | 0.67996300  | -1.82822500 |
| H         | -1.41769800 | 1.40803700  | -1.79806600 |
| S         | -0.34199100 | 0.23937800  | -3.40322400 |
| O         | -0.99552900 | 1.22165600  | -4.26068300 |
| O         | 1.06105400  | -0.11772000 | -3.53593400 |
| C         | -1.32431300 | -1.34751400 | -3.61179500 |
| F         | -2.61337400 | -1.10655400 | -3.36536900 |
| F         | -0.87867900 | -2.28473700 | -2.77876800 |
| F         | -1.17864100 | -1.75748800 | -4.86970200 |
| <b>M1</b> |             |             |             |
| C         | -3.35180700 | -1.76769900 | -0.53565100 |
| C         | -4.43128800 | -1.84971900 | -1.42992000 |
| C         | -5.13073700 | -0.69794400 | -1.76002600 |



|    |             |             |             |
|----|-------------|-------------|-------------|
| C  | -4.77708700 | 0.53435800  | -1.21698400 |
| C  | -3.66207800 | 0.65059200  | -0.37294900 |
| C  | -2.93061000 | -0.51971100 | -0.08882100 |
| C  | -3.32510100 | -3.95725300 | -1.45533800 |
| C  | -4.62482600 | -3.26376200 | -1.91744500 |
| H  | -5.35637000 | 1.41917800  | -1.45271300 |
| H  | -2.54989400 | -3.83195400 | -2.21788800 |
| H  | -3.44744200 | -5.02745200 | -1.27088600 |
| H  | -5.51606700 | -3.71743100 | -1.46540600 |
| C  | -2.89925100 | -3.17749100 | -0.16743700 |
| C  | -1.47755300 | -3.52844100 | 0.26026900  |
| C  | -3.70562200 | -3.71186800 | 1.06536200  |
| C  | -1.51075800 | -4.61836400 | 1.14608900  |
| C  | -0.24896000 | -3.00015200 | -0.12247200 |
| C  | -2.92652800 | -4.95612500 | 1.53808300  |
| H  | -3.69522900 | -2.95096800 | 1.85273500  |
| H  | -4.74859300 | -3.92266000 | 0.81741400  |
| C  | -0.31970900 | -5.20402200 | 1.55139000  |
| C  | 0.96769000  | -3.59193100 | 0.26852000  |
| H  | -3.26499500 | -5.86910000 | 1.03155400  |
| C  | 0.90549500  | -4.71777900 | 1.10421200  |
| H  | 1.82548000  | -5.20217900 | 1.40873100  |
| H  | -4.76743900 | -3.30462100 | -3.00114900 |
| H  | -3.02257500 | -5.13898100 | 2.61217600  |
| Br | -6.61448200 | -0.80266500 | -2.96499100 |
| C  | -3.30030700 | 1.99352400  | 0.16855700  |
| C  | -3.03417900 | 3.03154100  | -0.73580200 |
| C  | -3.28773200 | 2.26442400  | 1.56149800  |
| C  | -2.72762700 | 4.31616100  | -0.30272700 |
| H  | -3.04121400 | 2.81657800  | -1.79904200 |
| C  | -2.97064800 | 3.58693900  | 2.01020900  |
| C  | -3.61441500 | 1.27638400  | 2.55531700  |
| C  | -2.68217700 | 4.61995400  | 1.06543300  |
| H  | -2.51195300 | 5.09430600  | -1.02928100 |
| C  | -2.94856400 | 3.88749400  | 3.40797700  |
| C  | -3.59713800 | 1.56535600  | 3.88569200  |
| H  | -3.89086700 | 0.28053300  | 2.22952300  |
| C  | -2.35754700 | 5.93572000  | 1.54498700  |
| C  | -2.62308400 | 5.20579000  | 3.85598200  |
| C  | -3.25583800 | 2.87416300  | 4.36541700  |
| H  | -3.84996100 | 0.79858300  | 4.61290900  |
| C  | -2.32649800 | 6.21551600  | 2.87678600  |
| H  | -2.13569500 | 6.70850700  | 0.81421000  |
| C  | -2.60467700 | 5.47462000  | 5.23445100  |

|    |             |             |             |
|----|-------------|-------------|-------------|
| C  | -3.22671500 | 3.18978200  | 5.73403400  |
| H  | -2.07875600 | 7.21490100  | 3.22399000  |
| C  | -2.90273200 | 4.47619900  | 6.16080700  |
| H  | -2.35572700 | 6.47637600  | 5.57369600  |
| H  | -3.46133500 | 2.41623700  | 6.46000500  |
| H  | -2.88396200 | 4.70334400  | 7.22250300  |
| C  | 2.28977700  | -3.11444900 | -0.23092600 |
| C  | 2.53046500  | -3.15433900 | -1.61122300 |
| C  | 3.32286000  | -2.69442800 | 0.64442500  |
| C  | 3.76500900  | -2.81044200 | -2.14691800 |
| H  | 1.73302800  | -3.47636200 | -2.27250600 |
| C  | 4.60089600  | -2.35129900 | 0.09640500  |
| C  | 3.14280100  | -2.57184400 | 2.06724700  |
| C  | 4.82165300  | -2.41479600 | -1.31355000 |
| H  | 3.92174900  | -2.85857200 | -3.22077000 |
| C  | 5.66640200  | -1.94312800 | 0.95705900  |
| C  | 4.15884000  | -2.18033300 | 2.88458500  |
| H  | 2.16669600  | -2.78181500 | 2.48789400  |
| C  | 6.11689400  | -2.07266100 | -1.83465800 |
| C  | 6.94596500  | -1.61229700 | 0.41192200  |
| C  | 5.45933500  | -1.86206500 | 2.36721000  |
| H  | 3.99276800  | -2.09130900 | 3.95467500  |
| C  | 7.13252500  | -1.69159400 | -1.01115800 |
| H  | 6.27104700  | -2.13070500 | -2.90872500 |
| C  | 7.97948900  | -1.22156800 | 1.27934500  |
| C  | 6.52172800  | -1.46443800 | 3.19582700  |
| H  | 8.10810000  | -1.44183200 | -1.41949500 |
| C  | 7.76725500  | -1.15009400 | 2.65537800  |
| H  | 8.95278400  | -0.97477000 | 0.86395800  |
| H  | 6.36064900  | -1.40256600 | 4.26854300  |
| H  | 8.57795900  | -0.84560400 | 3.31054300  |
| O  | -1.74414500 | -0.41043000 | 0.64802500  |
| O  | -0.22530700 | -1.82163000 | -0.89262400 |
| P  | -0.28772800 | -0.42608900 | -0.07407900 |
| O  | 0.76043100  | -0.13867400 | 0.92090400  |
| Br | -0.35703500 | -6.70534100 | 2.73850300  |
| N  | -0.29001900 | 0.67530700  | -1.36537300 |
| H  | 0.08644900  | 1.61221700  | -1.11541700 |
| S  | -0.77071500 | 0.56900500  | -2.95230700 |
| O  | -1.69214100 | -0.54074400 | -3.14935000 |
| O  | -1.07100900 | 1.92443600  | -3.40620500 |
| C  | 0.80813500  | 0.10420200  | -3.84964600 |
| F  | 1.23159100  | -1.09369300 | -3.46007700 |
| F  | 1.75482200  | 1.01544700  | -3.59539400 |

|   |            |            |             |
|---|------------|------------|-------------|
| F | 0.55269700 | 0.08811000 | -5.15676800 |
| C | 6.39832900 | 4.17263500 | -0.49543300 |
| C | 5.26387400 | 4.86646400 | -0.91539200 |
| C | 4.23799900 | 4.20822300 | -1.61434200 |
| C | 4.39164600 | 2.84082700 | -1.90382300 |
| C | 5.52466900 | 2.14988700 | -1.47960700 |
| C | 6.53141600 | 2.81109400 | -0.77144600 |
| H | 7.17930400 | 4.69915900 | 0.04530600  |
| H | 5.17529400 | 5.92816100 | -0.70844500 |
| H | 3.62138200 | 2.31039100 | -2.45254700 |
| H | 5.62185300 | 1.09096700 | -1.69939500 |
| H | 7.41137600 | 2.26807100 | -0.44054100 |
| C | 3.03987400 | 4.95671600 | -2.03136200 |
| C | 2.47705600 | 6.21176000 | -1.44158400 |
| C | 1.84119000 | 4.52267600 | -2.82062900 |
| C | 1.61920300 | 4.97639000 | -1.40827900 |
| H | 2.16537900 | 7.01753600 | -2.10847000 |
| H | 2.89447500 | 6.54628900 | -0.49552400 |
| H | 1.48155300 | 5.17432200 | -3.61891300 |
| H | 1.72327600 | 3.46330900 | -3.02620700 |
| C | 1.22444600 | 4.14581600 | -0.27801300 |
| O | 0.74596800 | 3.01966100 | -0.37426900 |
| O | 1.46213300 | 4.73174600 | 0.90388900  |
| C | 1.15901700 | 3.93869300 | 2.07344000  |
| H | 1.50023700 | 4.53278700 | 2.91963000  |
| H | 0.08454100 | 3.76010400 | 2.13882800  |
| H | 1.68298900 | 2.98247100 | 2.03235500  |

**TS1**

|   |            |             |             |
|---|------------|-------------|-------------|
| C | 3.71481500 | 0.67903700  | -0.30384900 |
| C | 4.83393000 | 0.39181300  | -1.10185600 |
| C | 5.15064100 | -0.92990700 | -1.38007100 |
| C | 4.37215600 | -1.97290000 | -0.88458800 |
| C | 3.21087100 | -1.70520500 | -0.14546100 |
| C | 2.87446800 | -0.35743600 | 0.08959100  |
| C | 4.46958600 | 2.74277500  | -1.20282000 |
| C | 5.51008300 | 1.65935700  | -1.56216600 |
| H | 4.65011800 | -3.00157800 | -1.08164000 |
| H | 3.75832000 | 2.85771700  | -2.02684800 |
| H | 4.91513800 | 3.72040100  | -1.00185100 |
| H | 6.46158300 | 1.81276300  | -1.03713400 |
| C | 3.71560000 | 2.16618700  | 0.04055500  |
| C | 2.45617000 | 2.96503900  | 0.36574300  |
| C | 4.55791400 | 2.42995600  | 1.33584800  |

|    |             |             |             |
|----|-------------|-------------|-------------|
| C  | 2.77423600  | 3.99622900  | 1.26565500  |
| C  | 1.15273000  | 2.85222600  | -0.10834600 |
| C  | 4.19194900  | 3.86637600  | 1.76078800  |
| H  | 4.24239400  | 1.72608100  | 2.11305000  |
| H  | 5.62834500  | 2.28720600  | 1.16983400  |
| C  | 1.80797400  | 4.93591900  | 1.59565200  |
| C  | 0.16281100  | 3.80114100  | 0.21640900  |
| H  | 4.84191800  | 4.61266300  | 1.28606200  |
| C  | 0.52314000  | 4.85842900  | 1.06584700  |
| H  | -0.21341100 | 5.61227400  | 1.31688700  |
| H  | 5.74279200  | 1.63054100  | -2.63061600 |
| H  | 4.26660900  | 4.02623300  | 2.84029700  |
| Br | 6.68782100  | -1.33103100 | -2.45028000 |
| C  | 2.37260800  | -2.84082500 | 0.34025700  |
| C  | 1.80796900  | -3.71135500 | -0.60210600 |
| C  | 2.16905200  | -3.08492300 | 1.72289400  |
| C  | 1.02452100  | -4.79369900 | -0.21812000 |
| H  | 1.95646900  | -3.51214600 | -1.65793700 |
| C  | 1.36129900  | -4.19765800 | 2.12199800  |
| C  | 2.76089400  | -2.27688000 | 2.75619200  |
| C  | 0.77949800  | -5.05471800 | 1.13777300  |
| H  | 0.57121700  | -5.42654600 | -0.97385100 |
| C  | 1.13071600  | -4.46028800 | 3.50815500  |
| C  | 2.54673700  | -2.53254100 | 4.07628400  |
| H  | 3.40022100  | -1.45041500 | 2.46805500  |
| C  | -0.04266800 | -6.15403400 | 1.56629100  |
| C  | 0.31008600  | -5.56180000 | 3.90552900  |
| C  | 1.71892600  | -3.62424300 | 4.50482100  |
| H  | 3.00876800  | -1.90634500 | 4.83472300  |
| C  | -0.26962400 | -6.39486400 | 2.88720800  |
| H  | -0.47999900 | -6.79434300 | 0.80519700  |
| C  | 0.09577500  | -5.79645300 | 5.27368000  |
| C  | 1.47808700  | -3.89868000 | 5.86144900  |
| H  | -0.89172500 | -7.23067900 | 3.19600600  |
| C  | 0.67427100  | -4.97283400 | 6.23853100  |
| H  | -0.52874200 | -6.63322100 | 5.57455900  |
| H  | 1.92763900  | -3.26100900 | 6.61762600  |
| H  | 0.49778700  | -5.17055700 | 7.29163300  |
| C  | -1.21183300 | 3.74536200  | -0.35941800 |
| C  | -1.35320000 | 3.80227900  | -1.75307300 |
| C  | -2.37129700 | 3.69395900  | 0.45547800  |
| C  | -2.60226000 | 3.83086500  | -2.35994600 |
| H  | -0.46112100 | 3.83591100  | -2.36820400 |
| C  | -3.66107000 | 3.73883400  | -0.16649500 |

|    |             |             |             |
|----|-------------|-------------|-------------|
| C  | -2.31794900 | 3.57106000  | 1.88910100  |
| C  | -3.77408500 | 3.81311000  | -1.58876400 |
| H  | -2.67679200 | 3.88158400  | -3.44253900 |
| C  | -4.84681100 | 3.70871200  | 0.63159600  |
| C  | -3.44877800 | 3.53889800  | 2.64669800  |
| H  | -1.34995500 | 3.48515800  | 2.36775000  |
| C  | -5.08071400 | 3.86636100  | -2.18473800 |
| C  | -6.13389900 | 3.76712800  | 0.01155900  |
| C  | -4.75348000 | 3.61786000  | 2.05341600  |
| H  | -3.37758700 | 3.44034500  | 3.72647500  |
| C  | -6.20784200 | 3.84764900  | -1.42156500 |
| H  | -5.14946300 | 3.92551800  | -3.26757600 |
| C  | -7.28377900 | 3.74252400  | 0.81816900  |
| C  | -5.93084900 | 3.59422200  | 2.81938300  |
| H  | -7.18895900 | 3.89250200  | -1.88666800 |
| C  | -7.18067600 | 3.65798900  | 2.20586300  |
| H  | -8.26113900 | 3.79025900  | 0.34579700  |
| H  | -5.85621400 | 3.52419500  | 3.90108200  |
| H  | -8.08086300 | 3.64003400  | 2.81299500  |
| O  | 1.65954400  | -0.06710800 | 0.71558300  |
| O  | 0.81217000  | 1.75178200  | -0.90680000 |
| P  | 0.34694900  | 0.38855400  | -0.14576300 |
| O  | -0.79702000 | 0.49272000  | 0.79284000  |
| Br | 2.24241700  | 6.36194200  | 2.79835400  |
| N  | 0.03929800  | -0.66116600 | -1.39155400 |
| H  | -1.05265700 | -1.45904900 | -1.18893000 |
| S  | 0.63906000  | -0.74704300 | -2.90220300 |
| O  | 1.96248600  | -0.14254800 | -3.05924200 |
| O  | 0.38354200  | -2.10394500 | -3.39930800 |
| C  | -0.52636100 | 0.33053300  | -3.90544200 |
| F  | -1.79348800 | 0.10484500  | -3.54135700 |
| F  | -0.38260700 | 0.02720600  | -5.19860900 |
| F  | -0.24397100 | 1.62273000  | -3.72818500 |
| C  | -6.88310200 | -3.67174200 | -0.69644500 |
| C  | -5.79922000 | -2.80179900 | -0.63590800 |
| C  | -4.60534000 | -3.19286800 | 0.00214900  |
| C  | -4.53547300 | -4.46825400 | 0.59693600  |
| C  | -5.62153300 | -5.33489900 | 0.53008300  |
| C  | -6.79487400 | -4.94104300 | -0.11880100 |
| H  | -7.79822500 | -3.35853200 | -1.18835000 |
| H  | -5.88460400 | -1.81150700 | -1.06888300 |
| H  | -3.63663800 | -4.77999500 | 1.11603400  |
| H  | -5.55562600 | -6.31611600 | 0.98868100  |
| H  | -7.64236300 | -5.61791900 | -0.16495300 |

|   |             |             |             |
|---|-------------|-------------|-------------|
| C | -3.48635300 | -2.25570600 | 0.10360200  |
| C | -3.26379600 | -1.08907500 | -0.75581400 |
| C | -2.12128900 | -2.57737800 | 0.52854100  |
| C | -2.13824700 | -2.16987800 | -0.98659300 |
| H | -2.83137000 | -0.19923600 | -0.30213400 |
| H | -3.96537900 | -0.89674300 | -1.56104100 |
| H | -1.58773800 | -1.82914400 | 1.11088100  |
| H | -1.87885400 | -3.60574400 | 0.77511500  |
| C | -2.26708400 | -3.24127200 | -2.02142400 |
| O | -1.91117400 | -4.39258700 | -1.86268100 |
| O | -2.79502700 | -2.75403900 | -3.15603500 |
| C | -2.84932200 | -3.67582500 | -4.26416600 |
| H | -3.32179300 | -3.12643500 | -5.07687200 |
| H | -1.83858800 | -3.97897900 | -4.54343200 |
| H | -3.43794200 | -4.55682500 | -4.00130100 |

### B3LYP/SMD

#### React

|   |             |             |             |
|---|-------------|-------------|-------------|
| C | 2.78640000  | 1.06947500  | -1.01579000 |
| C | 1.67740300  | 0.25294100  | -1.23247900 |
| C | 1.17282000  | -0.56139300 | -0.20293600 |
| C | 1.83155700  | -0.55395600 | 1.03957100  |
| C | 2.93983600  | 0.26416700  | 1.25243500  |
| C | 3.42114000  | 1.08251500  | 0.22807200  |
| H | 3.15906300  | 1.69200100  | -1.82442600 |
| H | 1.20492700  | 0.24045200  | -2.20951100 |
| H | 1.47908500  | -1.19550400 | 1.84065700  |
| H | 3.43197700  | 0.25697500  | 2.22088700  |
| H | 4.28791500  | 1.71545100  | 0.39433200  |
| C | -0.00383900 | -1.41741100 | -0.43037800 |
| C | -0.98765800 | -1.39801500 | -1.56102000 |
| C | -0.79899700 | -2.22929900 | 0.54647800  |
| C | -1.50431100 | -1.12262000 | -0.17849700 |
| H | -1.27042100 | -2.34413000 | -2.02723400 |
| H | -0.94445600 | -0.55618400 | -2.24728100 |
| H | -1.06173100 | -3.25596300 | 0.28381500  |
| H | -0.60767600 | -2.07027500 | 1.60488500  |
| C | -2.00337500 | 0.11868500  | 0.41635600  |
| O | -2.11509800 | 0.31525000  | 1.61528100  |
| O | -2.32124700 | 1.03419300  | -0.52643600 |
| C | -2.78068400 | 2.30369300  | -0.02686100 |
| H | -2.99732700 | 2.90510500  | -0.91014700 |
| H | -3.68404300 | 2.17820000  | 0.57548100  |
| H | -2.00829800 | 2.78564000  | 0.57808300  |

**CBA**

|    |             |             |             |
|----|-------------|-------------|-------------|
| C  | -1.89609500 | -2.17741200 | 0.49007500  |
| C  | -2.86146300 | -3.08041500 | 0.00895900  |
| C  | -4.06540300 | -2.59436500 | -0.48119000 |
| C  | -4.32664700 | -1.22698000 | -0.51802100 |
| C  | -3.35383700 | -0.30499800 | -0.10496000 |
| C  | -2.12473000 | -0.81055000 | 0.36389900  |
| C  | -0.85835300 | -4.31103600 | 0.36613300  |
| C  | -2.36498600 | -4.50141200 | 0.09688500  |
| H  | -5.27959000 | -0.86257300 | -0.88353000 |
| H  | -0.32566300 | -4.20402800 | -0.58455000 |
| H  | -0.40833200 | -5.14206700 | 0.91450000  |
| H  | -2.86293400 | -5.03973400 | 0.91333400  |
| C  | -0.76509000 | -2.96198500 | 1.15393400  |
| C  | 0.67718900  | -2.46970600 | 1.24104700  |
| C  | -1.07073600 | -3.21254700 | 2.66940400  |
| C  | 1.28116000  | -2.99753900 | 2.39430300  |
| C  | 1.43508500  | -1.69273100 | 0.37099500  |
| C  | 0.26769000  | -3.69267900 | 3.26697400  |
| H  | -1.36196300 | -2.26519800 | 3.13498800  |
| H  | -1.88729900 | -3.92419300 | 2.81287100  |
| C  | 2.64272500  | -2.81216400 | 2.59080200  |
| C  | 2.81801300  | -1.50317400 | 0.55021700  |
| H  | 0.37852900  | -4.78251700 | 3.20044800  |
| C  | 3.41093400  | -2.09868300 | 1.67540700  |
| H  | 4.47701400  | -1.98507900 | 1.83178300  |
| H  | -2.56576900 | -5.06285900 | -0.82034400 |
| H  | 0.38169200  | -3.42684300 | 4.32196100  |
| Br | -5.39499900 | -3.81893700 | -1.11766900 |
| C  | -3.63213200 | 1.15597200  | -0.23597200 |
| C  | -3.92580100 | 1.66214700  | -1.51319800 |
| C  | -3.64592400 | 2.03358800  | 0.87906600  |
| C  | -4.19541900 | 3.01088000  | -1.72141300 |
| H  | -3.92427700 | 0.98168900  | -2.35923400 |
| C  | -3.92430600 | 3.42260000  | 0.66665300  |
| C  | -3.42110000 | 1.58737300  | 2.22855900  |
| C  | -4.19367700 | 3.91436000  | -0.64826800 |
| H  | -4.40482100 | 3.37258700  | -2.72408700 |
| C  | -3.93899300 | 4.32936000  | 1.77151000  |
| C  | -3.44126400 | 2.45248400  | 3.27977000  |
| H  | -3.24380900 | 0.53312500  | 2.40803400  |
| C  | -4.45810000 | 5.31510100  | -0.83210400 |
| C  | -4.20538400 | 5.71776100  | 1.55898700  |

|    |             |             |             |
|----|-------------|-------------|-------------|
| C  | -3.69034000 | 3.85376000  | 3.09432400  |
| H  | -3.27060300 | 2.08772100  | 4.28908600  |
| C  | -4.46174000 | 6.17696400  | 0.22135000  |
| H  | -4.65585000 | 5.67252100  | -1.83895900 |
| C  | -4.21037100 | 6.58936800  | 2.66051000  |
| C  | -3.70765900 | 4.76198500  | 4.16604100  |
| H  | -4.66198900 | 7.23391500  | 0.06772300  |
| C  | -3.96337600 | 6.11440800  | 3.94782000  |
| H  | -4.41058800 | 7.64484100  | 2.49735400  |
| H  | -3.51848600 | 4.39653700  | 5.17170500  |
| H  | -3.97145200 | 6.80378200  | 4.78707400  |
| C  | 3.66513300  | -0.76319600 | -0.42940600 |
| C  | 3.72688700  | -1.23549300 | -1.74826600 |
| C  | 4.45530800  | 0.35267100  | -0.05065400 |
| C  | 4.56710800  | -0.65711200 | -2.69093200 |
| H  | 3.11396500  | -2.08489700 | -2.03180100 |
| C  | 5.32955100  | 0.94459300  | -1.01885200 |
| C  | 4.40423800  | 0.94289500  | 1.26172400  |
| C  | 5.38782500  | 0.42808900  | -2.34966300 |
| H  | 4.59793200  | -1.05072100 | -3.70292600 |
| C  | 6.15160900  | 2.05804000  | -0.66103400 |
| C  | 5.18481300  | 2.00676700  | 1.59850100  |
| H  | 3.71272700  | 0.53714100  | 1.99057900  |
| C  | 6.28155100  | 1.03513500  | -3.29739400 |
| C  | 7.03435700  | 2.63983100  | -1.62382200 |
| C  | 6.09476600  | 2.59835200  | 0.65939300  |
| H  | 5.11968000  | 2.43546900  | 2.59501500  |
| C  | 7.07008600  | 2.08931200  | -2.95104000 |
| H  | 6.31303400  | 0.63048200  | -4.30545800 |
| C  | 7.83637200  | 3.72965700  | -1.24606000 |
| C  | 6.91389500  | 3.69051400  | 0.99140800  |
| H  | 7.74201800  | 2.53783900  | -3.67801800 |
| C  | 7.77530500  | 4.24653300  | 0.04736000  |
| H  | 8.50805500  | 4.16937300  | -1.97850700 |
| H  | 6.86610800  | 4.10005100  | 1.99683600  |
| H  | 8.40198900  | 5.09071900  | 0.32035700  |
| O  | -1.10617700 | 0.10026100  | 0.68327800  |
| O  | 0.77128000  | -1.04457500 | -0.69346000 |
| P  | 0.11763800  | 0.38918000  | -0.34223800 |
| O  | 0.98883100  | 1.44919000  | 0.19433500  |
| Br | 3.48627800  | -3.55316100 | 4.14449100  |
| N  | -0.66740600 | 0.69719300  | -1.82833500 |
| H  | -1.36082100 | 1.44760400  | -1.80303600 |
| S  | -0.27152500 | 0.28238500  | -3.39895600 |



|   |             |             |             |
|---|-------------|-------------|-------------|
| O | -0.91850200 | 1.26841400  | -4.25784500 |
| O | 1.13699600  | -0.06010400 | -3.51423800 |
| C | -1.22947800 | -1.31116100 | -3.64951000 |
| F | -2.52532600 | -1.09422700 | -3.42067800 |
| F | -0.78275300 | -2.25848700 | -2.82868600 |
| F | -1.05816300 | -1.69550000 | -4.91339500 |

**M1**

|    |             |             |             |
|----|-------------|-------------|-------------|
| C  | -3.56533800 | -1.27062200 | -0.64885200 |
| C  | -4.62124200 | -1.14663200 | -1.56750000 |
| C  | -5.12767900 | 0.11295900  | -1.85417900 |
| C  | -4.60470800 | 1.25259000  | -1.24879700 |
| C  | -3.50779200 | 1.15841900  | -0.37877600 |
| C  | -2.97154400 | -0.12190200 | -0.13563600 |
| C  | -3.84717300 | -3.39495500 | -1.67387400 |
| C  | -5.01417600 | -2.49164200 | -2.12526200 |
| H  | -5.03474800 | 2.22596300  | -1.45416800 |
| H  | -3.04242700 | -3.35416800 | -2.41504000 |
| H  | -4.13593500 | -4.44100000 | -1.54360500 |
| H  | -5.97427600 | -2.82380000 | -1.71003900 |
| C  | -3.34351700 | -2.74946700 | -0.34080200 |
| C  | -2.00505300 | -3.33599100 | 0.09960600  |
| C  | -4.25781800 | -3.21082900 | 0.84477100  |
| C  | -2.23271500 | -4.45102100 | 0.92467300  |
| C  | -0.69824600 | -2.98603600 | -0.22445700 |
| C  | -3.69470600 | -4.58264800 | 1.26640300  |
| H  | -4.15253600 | -2.50125300 | 1.67222300  |
| H  | -5.31264800 | -3.24442100 | 0.56195300  |
| C  | -1.15781100 | -5.23395800 | 1.32150600  |
| C  | 0.40106800  | -3.77723700 | 0.16248300  |
| H  | -4.15433800 | -5.40485900 | 0.70312200  |
| C  | 0.14140100  | -4.92206300 | 0.93143500  |
| H  | 0.96718800  | -5.55702600 | 1.22979200  |
| H  | -5.13262300 | -2.46320700 | -3.21244600 |
| H  | -3.85142300 | -4.79950500 | 2.32713200  |
| Br | -6.58331500 | 0.29193500  | -3.08910400 |
| C  | -2.95643400 | 2.40499500  | 0.23154800  |
| C  | -2.48678500 | 3.41674000  | -0.61831700 |
| C  | -2.95620500 | 2.61974100  | 1.63453400  |
| C  | -1.99155900 | 4.61685400  | -0.12138900 |
| H  | -2.48933500 | 3.24656700  | -1.68972000 |
| C  | -2.44747200 | 3.85585700  | 2.14895900  |
| C  | -3.47660800 | 1.66218500  | 2.57454900  |
| C  | -1.95563700 | 4.86062600  | 1.25927600  |

|   |             |             |             |
|---|-------------|-------------|-------------|
| H | -1.62151600 | 5.37422400  | -0.80671700 |
| C | -2.43206400 | 4.09763700  | 3.55816500  |
| C | -3.46491900 | 1.89568700  | 3.91600700  |
| H | -3.89826700 | 0.73715200  | 2.19854600  |
| C | -1.44069200 | 6.08714500  | 1.80434200  |
| C | -1.91484600 | 5.32788700  | 4.07199400  |
| C | -2.93606100 | 3.11343300  | 4.46143600  |
| H | -3.86599400 | 1.15444300  | 4.60217300  |
| C | -1.41914500 | 6.31032600  | 3.14695000  |
| H | -1.06542000 | 6.83762300  | 1.11379900  |
| C | -1.90737400 | 5.53970100  | 5.46066100  |
| C | -2.90969100 | 3.36984000  | 5.84264800  |
| H | -1.02641700 | 7.24223100  | 3.54493400  |
| C | -2.39892700 | 4.56993000  | 6.33359400  |
| H | -1.51254500 | 6.47445600  | 5.84967200  |
| H | -3.29432600 | 2.61852700  | 6.52707700  |
| H | -2.38507900 | 4.75222100  | 7.40430300  |
| C | 1.79748400  | -3.47514900 | -0.26901800 |
| C | 2.08385800  | -3.47889200 | -1.64132300 |
| C | 2.84428300  | -3.24760000 | 0.66041000  |
| C | 3.37280500  | -3.27744200 | -2.11886300 |
| H | 1.27680000  | -3.65703100 | -2.34428600 |
| C | 4.17651500  | -3.05104400 | 0.17136600  |
| C | 2.62985200  | -3.18014800 | 2.08255700  |
| C | 4.43999400  | -3.06827400 | -1.23275100 |
| H | 3.56308200  | -3.29145500 | -3.18845500 |
| C | 5.25410900  | -2.83563900 | 1.08562000  |
| C | 3.65824900  | -2.97423600 | 2.95103400  |
| H | 1.62066000  | -3.28238900 | 2.46352100  |
| C | 5.78690200  | -2.87137000 | -1.69460100 |
| C | 6.58539400  | -2.64850300 | 0.59840100  |
| C | 5.00756900  | -2.80450300 | 2.49164100  |
| H | 3.46641000  | -2.92368800 | 4.01951900  |
| C | 6.81232400  | -2.67279000 | -0.82086700 |
| H | 5.97057900  | -2.88947300 | -2.76564700 |
| C | 7.62850200  | -2.44680900 | 1.51752300  |
| C | 6.08185900  | -2.59813900 | 3.37327700  |
| H | 7.82666100  | -2.53072100 | -1.18442400 |
| C | 7.37688300  | -2.42354000 | 2.88857900  |
| H | 8.64008900  | -2.30764900 | 1.14558900  |
| H | 5.89027600  | -2.57407100 | 4.44265900  |
| H | 8.19607100  | -2.26587100 | 3.58422600  |
| O | -1.80627300 | -0.22721400 | 0.63477800  |
| O | -0.46903300 | -1.78789700 | -0.92903300 |

|            |             |             |             |
|------------|-------------|-------------|-------------|
| P          | -0.34369200 | -0.44068600 | -0.04044500 |
| O          | 0.69514900  | -0.37060200 | 1.00194500  |
| Br         | -1.46002600 | -6.77410200 | 2.42296700  |
| N          | -0.11752000 | 0.70863500  | -1.26943700 |
| H          | 0.43273400  | 1.54134100  | -0.97025100 |
| S          | -0.53575500 | 0.74886500  | -2.87579400 |
| O          | -1.62427400 | -0.17525000 | -3.15945300 |
| O          | -0.57894300 | 2.15239500  | -3.27873100 |
| C          | 0.97825900  | 0.05652000  | -3.73661600 |
| F          | 1.11771700  | -1.23746800 | -3.46658400 |
| F          | 2.06748900  | 0.71678800  | -3.33135200 |
| F          | 0.82157600  | 0.22507700  | -5.04959900 |
| C          | 7.00579500  | 3.97549600  | -0.82461500 |
| C          | 5.83452100  | 4.67058400  | -1.12545800 |
| C          | 4.73916200  | 4.01222100  | -1.70996500 |
| C          | 4.85694200  | 2.64150100  | -2.00279300 |
| C          | 6.02649400  | 1.94939900  | -1.69539400 |
| C          | 7.10573500  | 2.61187300  | -1.10451200 |
| H          | 7.84139400  | 4.50284900  | -0.37314100 |
| H          | 5.77006900  | 5.73355100  | -0.91478800 |
| H          | 4.03091700  | 2.10972900  | -2.46204500 |
| H          | 6.09278600  | 0.88728200  | -1.91325000 |
| H          | 8.01680100  | 2.06981000  | -0.86860800 |
| C          | 3.50718300  | 4.76589500  | -2.00629300 |
| C          | 2.99322800  | 5.99503400  | -1.32813800 |
| C          | 2.24583500  | 4.34029000  | -2.69548400 |
| C          | 2.14662700  | 4.75150600  | -1.25614400 |
| H          | 2.61443700  | 6.81723300  | -1.93794400 |
| H          | 3.49646700  | 6.30410700  | -0.41552900 |
| H          | 1.81017300  | 5.01025600  | -3.43890800 |
| H          | 2.12434700  | 3.28571200  | -2.92164300 |
| C          | 1.88993900  | 3.87329000  | -0.12153800 |
| O          | 1.40334700  | 2.74833000  | -0.20511100 |
| O          | 2.27267600  | 4.40930600  | 1.04502700  |
| C          | 2.13936400  | 3.56195500  | 2.20830600  |
| H          | 2.49797200  | 4.16300500  | 3.04356800  |
| H          | 1.09663200  | 3.27944600  | 2.36163500  |
| H          | 2.74694600  | 2.66139800  | 2.09561600  |
| <b>TS1</b> |             |             |             |
| C          | 3.59394500  | 1.23315700  | -0.34356800 |
| C          | 4.72284200  | 1.15544000  | -1.17674700 |
| C          | 5.24601700  | -0.08888600 | -1.49701100 |
| C          | 4.66780200  | -1.25858400 | -1.01094700 |

|    |             |             |             |
|----|-------------|-------------|-------------|
| C  | 3.50186900  | -1.20596900 | -0.23353200 |
| C  | 2.95219100  | 0.06109100  | 0.04555100  |
| C  | 3.96501900  | 3.41106100  | -1.21550000 |
| C  | 5.16445200  | 2.52789000  | -1.61967200 |
| H  | 5.10681400  | -2.22199900 | -1.24269700 |
| H  | 3.22476600  | 3.41631000  | -2.02207200 |
| H  | 4.24277200  | 4.44651000  | -1.00236100 |
| H  | 6.08706200  | 2.82906700  | -1.10706200 |
| C  | 3.35063300  | 2.69381300  | 0.03175400  |
| C  | 1.98173700  | 3.26613200  | 0.39301900  |
| C  | 4.16419500  | 3.08052100  | 1.31361400  |
| C  | 2.14460400  | 4.33190400  | 1.29526100  |
| C  | 0.70511500  | 2.94423800  | -0.05750100 |
| C  | 3.57407700  | 4.43231900  | 1.76263400  |
| H  | 3.98645700  | 2.32714200  | 2.08825300  |
| H  | 5.23956600  | 3.12052400  | 1.12357000  |
| C  | 1.04364200  | 5.10113900  | 1.64444200  |
| C  | -0.41977700 | 3.72125900  | 0.28565500  |
| H  | 4.08201400  | 5.27961500  | 1.28415100  |
| C  | -0.22088600 | 4.82096700  | 1.13438000  |
| H  | -1.06515800 | 5.44627900  | 1.39965700  |
| H  | 5.37298600  | 2.56200800  | -2.69311100 |
| H  | 3.64410500  | 4.59039600  | 2.84290500  |
| Br | 6.79984900  | -0.20678700 | -2.61614300 |
| C  | 2.88630100  | -2.48215400 | 0.24045400  |
| C  | 2.45832800  | -3.41550400 | -0.71413900 |
| C  | 2.77627600  | -2.79786500 | 1.61970100  |
| C  | 1.90439400  | -4.63631200 | -0.34551500 |
| H  | 2.53771700  | -3.16582200 | -1.76687400 |
| C  | 2.20953700  | -4.05628100 | 2.00283800  |
| C  | 3.23699500  | -1.92083000 | 2.66383800  |
| C  | 1.76702300  | -4.98108300 | 1.00709900  |
| H  | 1.55996700  | -5.32608900 | -1.11032200 |
| C  | 2.08712700  | -4.40042200 | 3.38518100  |
| C  | 3.12211300  | -2.25104000 | 3.97988300  |
| H  | 3.69590300  | -0.97812500 | 2.38896100  |
| C  | 1.19434000  | -6.23354500 | 1.42059400  |
| C  | 1.51467900  | -5.65409200 | 3.76727100  |
| C  | 2.53828400  | -3.49551900 | 4.39344900  |
| H  | 3.48009700  | -1.56894600 | 4.74652800  |
| C  | 1.07201500  | -6.55486500 | 2.73787900  |
| H  | 0.86043100  | -6.92343300 | 0.65017400  |
| C  | 1.40350600  | -5.96769700 | 5.13215200  |
| C  | 2.40745500  | -3.85240500 | 5.74619200  |

|    |             |             |             |
|----|-------------|-------------|-------------|
| H  | 0.63855000  | -7.50599600 | 3.03583700  |
| C  | 1.84505800  | -5.07511900 | 6.10812400  |
| H  | 0.96794000  | -6.92059300 | 5.42089200  |
| H  | 2.75248000  | -3.16134400 | 6.51059600  |
| H  | 1.75127400  | -5.33556200 | 7.15850900  |
| C  | -1.77513600 | 3.44369900  | -0.27261300 |
| C  | -1.93760500 | 3.46411200  | -1.66564500 |
| C  | -2.90363100 | 3.21035900  | 0.55489100  |
| C  | -3.18045100 | 3.28552500  | -2.25962800 |
| H  | -1.06895800 | 3.63534500  | -2.29163900 |
| C  | -4.18949300 | 3.03945900  | -0.05445300 |
| C  | -2.81790100 | 3.10573200  | 1.98859100  |
| C  | -4.32669500 | 3.08365000  | -1.47607100 |
| H  | -3.27245600 | 3.31392300  | -3.34179100 |
| C  | -5.34710200 | 2.82063700  | 0.75588700  |
| C  | -3.92142400 | 2.89334700  | 2.75776000  |
| H  | -1.84523200 | 3.18179500  | 2.45974500  |
| C  | -5.62995100 | 2.91879200  | -2.05915200 |
| C  | -6.63225400 | 2.66328600  | 0.14841100  |
| C  | -5.22699000 | 2.75447100  | 2.17733200  |
| H  | -3.82494700 | 2.81316400  | 3.83726300  |
| C  | -6.73195900 | 2.72153000  | -1.28439900 |
| H  | -5.71669200 | 2.95871700  | -3.14176500 |
| C  | -7.75507000 | 2.45473700  | 0.96683800  |
| C  | -6.37753200 | 2.54204600  | 2.95528200  |
| H  | -7.71199400 | 2.60274000  | -1.73900500 |
| C  | -7.62641600 | 2.39625600  | 2.35383500  |
| H  | -8.73129600 | 2.33845900  | 0.50363800  |
| H  | -6.28189300 | 2.49113100  | 4.03652400  |
| H  | -8.50597900 | 2.23365200  | 2.97012500  |
| O  | 1.73020200  | 0.13031800  | 0.71965800  |
| O  | 0.52967800  | 1.79855800  | -0.84699500 |
| P  | 0.32220400  | 0.37934200  | -0.07031200 |
| O  | -0.77505900 | 0.30626000  | 0.92321400  |
| Br | 1.26034900  | 6.57882200  | 2.84847300  |
| N  | 0.12130400  | -0.69920100 | -1.31796700 |
| H  | -0.82926600 | -1.54207700 | -1.14506500 |
| S  | 0.66117500  | -0.63825700 | -2.85660600 |
| O  | 1.89201700  | 0.13246700  | -3.03259700 |
| O  | 0.55576000  | -1.99320100 | -3.40635300 |
| C  | -0.67463600 | 0.34039400  | -3.76674400 |
| F  | -0.33689500 | 1.63034700  | -3.83154200 |
| F  | -1.85371000 | 0.22874400  | -3.14750400 |
| F  | -0.78683700 | -0.14153400 | -5.00770100 |

|   |             |             |             |
|---|-------------|-------------|-------------|
| C | -6.59686900 | -4.24332700 | -0.69808700 |
| C | -5.56701900 | -3.31413500 | -0.62113000 |
| C | -4.35557300 | -3.64450900 | 0.02674200  |
| C | -4.21641800 | -4.92360400 | 0.61014400  |
| C | -5.25106200 | -5.84755400 | 0.52808100  |
| C | -6.43929200 | -5.51102100 | -0.12803500 |
| H | -7.52432500 | -3.98248600 | -1.19796600 |
| H | -5.69718000 | -2.32770500 | -1.05226900 |
| H | -3.30171300 | -5.18352500 | 1.13119300  |
| H | -5.13592700 | -6.82909600 | 0.97670400  |
| H | -7.24693500 | -6.23462200 | -0.18839300 |
| C | -3.30236600 | -2.66131400 | 0.15475200  |
| C | -3.11379700 | -1.44498900 | -0.67143400 |
| C | -1.87866200 | -2.91846100 | 0.47911500  |
| C | -1.84671900 | -2.34765700 | -0.99158900 |
| H | -2.79069200 | -0.54819300 | -0.14260200 |
| H | -3.83240100 | -1.23972700 | -1.46117300 |
| H | -1.40427700 | -2.20899500 | 1.15673600  |
| H | -1.56526200 | -3.94615900 | 0.64456400  |
| C | -1.91933900 | -3.33921300 | -2.10309500 |
| O | -1.51082500 | -4.48482900 | -2.04652900 |
| O | -2.43688300 | -2.77628500 | -3.21408200 |
| C | -2.38521900 | -3.58042000 | -4.40717800 |
| H | -2.81194700 | -2.96081200 | -5.19615600 |
| H | -1.35103200 | -3.83741300 | -4.64610300 |
| H | -2.97134900 | -4.49475300 | -4.28477000 |

**ωB97X-D/IEF-PCM**

**React**

|   |             |             |             |
|---|-------------|-------------|-------------|
| C | 2.88435000  | 0.58542600  | -1.12083700 |
| C | 1.77703500  | -0.25113500 | -1.22026600 |
| C | 1.09045200  | -0.66302000 | -0.07342800 |
| C | 1.54796900  | -0.23261200 | 1.17800400  |
| C | 2.65387700  | 0.60365200  | 1.27444800  |
| C | 3.32556200  | 1.01798300  | 0.12623700  |
| H | 3.40552100  | 0.89503000  | -2.02110900 |
| H | 1.44671400  | -0.59592600 | -2.19493600 |
| H | 1.03587600  | -0.54717000 | 2.08120100  |
| H | 2.99282900  | 0.93250900  | 2.25160600  |
| H | 4.19063600  | 1.66837000  | 0.20461100  |
| C | -0.10200600 | -1.51858400 | -0.19947500 |
| C | -1.04437600 | -1.61936700 | -1.35463800 |
| C | -0.96457500 | -2.12999700 | 0.85711300  |
| C | -1.56631000 | -1.10172700 | -0.04759900 |

|   |             |             |             |
|---|-------------|-------------|-------------|
| H | -1.38336200 | -2.60245600 | -1.68140800 |
| H | -0.92325900 | -0.89088400 | -2.15210500 |
| H | -1.28632100 | -3.16439600 | 0.73628000  |
| H | -0.79064700 | -1.82674600 | 1.88581300  |
| C | -1.92953700 | 0.26148500  | 0.34011900  |
| O | -2.01508700 | 0.64691800  | 1.48901300  |
| O | -2.11773700 | 1.05005700  | -0.72824000 |
| C | -2.38443300 | 2.42378300  | -0.43665800 |
| H | -2.51355500 | 2.91021700  | -1.40184200 |
| H | -3.29202900 | 2.52037900  | 0.16251400  |
| H | -1.54784200 | 2.86994200  | 0.10506800  |

**CBA**

|    |             |             |             |
|----|-------------|-------------|-------------|
| C  | -2.11301300 | -2.00284800 | 0.54824000  |
| C  | -3.20203500 | -2.75239700 | 0.09211400  |
| C  | -4.34854300 | -2.10605200 | -0.33431200 |
| C  | -4.42192100 | -0.71830100 | -0.33676600 |
| C  | -3.31971900 | 0.04722300  | 0.04379500  |
| C  | -2.16036800 | -0.62172800 | 0.46344200  |
| C  | -1.36647900 | -4.23546600 | 0.31987400  |
| C  | -2.89122600 | -4.22438900 | 0.11923000  |
| H  | -5.32592200 | -0.21952500 | -0.66670500 |
| H  | -0.86524000 | -4.17179200 | -0.65052400 |
| H  | -1.00379600 | -5.13110300 | 0.82918300  |
| H  | -3.41882800 | -4.71717400 | 0.94422200  |
| C  | -1.06737000 | -2.94010100 | 1.12733800  |
| C  | 0.41716800  | -2.62681000 | 1.13883400  |
| C  | -1.31634700 | -3.18649000 | 2.64414300  |
| C  | 1.01710400  | -3.24417900 | 2.23861900  |
| C  | 1.20219300  | -1.91355000 | 0.24928000  |
| C  | -0.02004700 | -3.84199800 | 3.15044700  |
| H  | -1.45927500 | -2.22110600 | 3.14010500  |
| H  | -2.20690500 | -3.79336700 | 2.82305500  |
| C  | 2.39508200  | -3.21027800 | 2.36929600  |
| C  | 2.59485300  | -1.85985900 | 0.36956400  |
| H  | -0.04429800 | -4.93327700 | 3.04764600  |
| C  | 3.18155900  | -2.54523000 | 1.43662000  |
| H  | 4.26000000  | -2.53052500 | 1.54501400  |
| H  | -3.20299600 | -4.72235200 | -0.80235600 |
| H  | 0.18480600  | -3.62412700 | 4.20157300  |
| Br | -5.82561900 | -3.12221900 | -0.94195000 |
| C  | -3.36136700 | 1.52903700  | -0.08561700 |
| C  | -3.61049100 | 2.07604800  | -1.34971600 |
| C  | -3.13887200 | 2.38596500  | 1.01069200  |

|   |             |             |             |
|---|-------------|-------------|-------------|
| C | -3.60120300 | 3.44741700  | -1.56024500 |
| H | -3.79174500 | 1.40777100  | -2.18592800 |
| C | -3.12852700 | 3.79245500  | 0.79644500  |
| C | -2.94095200 | 1.89654800  | 2.35194000  |
| C | -3.35194800 | 4.32503100  | -0.50162000 |
| H | -3.77937100 | 3.84280700  | -2.55528700 |
| C | -2.88730800 | 4.68165500  | 1.88989600  |
| C | -2.72023200 | 2.74057800  | 3.38525400  |
| H | -2.98286800 | 0.82794900  | 2.52971800  |
| C | -3.31850300 | 5.75194700  | -0.69092500 |
| C | -2.85971100 | 6.08546900  | 1.67479600  |
| C | -2.67440200 | 4.16547200  | 3.19437000  |
| H | -2.57610000 | 2.34957100  | 4.38810500  |
| C | -3.08258700 | 6.58960400  | 0.34460300  |
| H | -3.48692900 | 6.14181900  | -1.69021800 |
| C | -2.61739000 | 6.93692400  | 2.75774200  |
| C | -2.43725800 | 5.05036300  | 4.25118700  |
| H | -3.05801000 | 7.66416600  | 0.18947100  |
| C | -2.40807600 | 6.42261500  | 4.03220700  |
| H | -2.59372100 | 8.01007200  | 2.59255900  |
| H | -2.27483000 | 4.65338000  | 5.24890600  |
| H | -2.22103400 | 7.09700400  | 4.86136000  |
| C | 3.43493900  | -1.12287200 | -0.61152300 |
| C | 3.39121800  | -1.50769100 | -1.95214100 |
| C | 4.28310300  | -0.07122400 | -0.21194300 |
| C | 4.19148500  | -0.89627000 | -2.90332000 |
| H | 2.71771700  | -2.30400600 | -2.25046300 |
| C | 5.11504500  | 0.54871600  | -1.18503700 |
| C | 4.32655700  | 0.42849400  | 1.14004300  |
| C | 5.07063200  | 0.12685200  | -2.54034100 |
| H | 4.13974700  | -1.21462400 | -3.93991700 |
| C | 6.00144100  | 1.60455700  | -0.80444600 |
| C | 5.16313000  | 1.42976600  | 1.49683000  |
| H | 3.65553000  | 0.00034600  | 1.87524100  |
| C | 5.92965600  | 0.76756500  | -3.50224900 |
| C | 6.84246500  | 2.21508700  | -1.77351100 |
| C | 6.04342800  | 2.04926900  | 0.54272800  |
| H | 5.17251900  | 1.79462400  | 2.51977300  |
| C | 6.77522700  | 1.75847300  | -3.13765600 |
| H | 5.88255700  | 0.43375400  | -4.53466600 |
| C | 7.70709400  | 3.24113400  | -1.37784200 |
| C | 6.92072000  | 3.07956500  | 0.89748700  |
| H | 7.41940100  | 2.23254900  | -3.87256500 |
| C | 7.74530900  | 3.66689500  | -0.05489500 |



|    |             |             |             |
|----|-------------|-------------|-------------|
| H  | 8.35077600  | 3.70617000  | -2.11899700 |
| H  | 6.94933900  | 3.41943000  | 1.92875700  |
| H  | 8.42090800  | 4.46510600  | 0.23516400  |
| O  | -1.02842000 | 0.13280700  | 0.75982200  |
| O  | 0.56743700  | -1.18077400 | -0.75876200 |
| P  | 0.13389600  | 0.30566600  | -0.34394800 |
| O  | 1.16075600  | 1.23538400  | 0.13485800  |
| Br | 3.21667500  | -4.07024900 | 3.84314400  |
| N  | -0.71003800 | 0.72645400  | -1.75236500 |
| H  | -1.32390300 | 1.53867500  | -1.67815200 |
| S  | -0.54056200 | 0.21867600  | -3.31789300 |
| O  | -1.14251500 | 1.24774000  | -4.13845300 |
| O  | 0.78449500  | -0.30007800 | -3.55442600 |
| C  | -1.70192900 | -1.23205500 | -3.41082100 |
| F  | -2.92794900 | -0.83639300 | -3.09388900 |
| F  | -1.32063200 | -2.19439800 | -2.58710800 |
| F  | -1.68888400 | -1.68043500 | -4.65688300 |

## M1

|   |             |             |             |
|---|-------------|-------------|-------------|
| C | -2.58149900 | -2.62055100 | 0.00047300  |
| C | -3.65432900 | -3.15431600 | -0.71676600 |
| C | -4.67939700 | -2.32252900 | -1.12828500 |
| C | -4.64797200 | -0.96599900 | -0.83786100 |
| C | -3.55369600 | -0.40019600 | -0.17734500 |
| C | -2.50235100 | -1.25095200 | 0.19812900  |
| C | -1.99315900 | -4.83733600 | -0.57891800 |
| C | -3.47045800 | -4.62904000 | -0.95054800 |
| H | -5.47141500 | -0.32720200 | -1.13556300 |
| H | -1.36330100 | -4.63918300 | -1.45170700 |
| H | -1.77261200 | -5.84603300 | -0.22144400 |
| H | -4.14295900 | -5.21133200 | -0.30953500 |
| C | -1.70559800 | -3.75550100 | 0.49979700  |
| C | -0.21849300 | -3.60839500 | 0.75023700  |
| C | -2.18360400 | -4.24632500 | 1.89795500  |
| C | 0.17200100  | -4.46025500 | 1.78562900  |
| C | 0.73237000  | -2.84017800 | 0.10051700  |
| C | -1.02455000 | -5.10511600 | 2.43072500  |
| H | -2.32531700 | -3.37626900 | 2.54730700  |
| H | -3.13257200 | -4.78479700 | 1.84398100  |
| C | 1.51555800  | -4.58154000 | 2.09575400  |
| C | 2.09405400  | -2.94946600 | 0.40321300  |
| H | -1.11292000 | -6.15264400 | 2.11916400  |
| C | 2.47171300  | -3.85044400 | 1.40242400  |
| H | 3.52235400  | -3.95572000 | 1.64782000  |

|    |             |             |             |
|----|-------------|-------------|-------------|
| H  | -3.69247700 | -4.90712000 | -1.98386500 |
| H  | -0.95553600 | -5.09999700 | 3.52140400  |
| Br | -6.14505300 | -3.04271000 | -2.08790700 |
| C  | -3.55490800 | 1.06866800  | 0.06396000  |
| C  | -3.76652600 | 1.91495300  | -1.02719900 |
| C  | -3.42069900 | 1.62085800  | 1.35392900  |
| C  | -3.81418300 | 3.29120800  | -0.87848800 |
| H  | -3.86512200 | 1.48193400  | -2.01678200 |
| C  | -3.45175800 | 3.03517600  | 1.50620900  |
| C  | -3.27572200 | 0.81396600  | 2.53958800  |
| C  | -3.64531800 | 3.87543600  | 0.37781600  |
| H  | -3.96009300 | 3.92533500  | -1.74781000 |
| C  | -3.26709200 | 3.62387800  | 2.79630600  |
| C  | -3.11778100 | 1.37215800  | 3.76228900  |
| H  | -3.30366400 | -0.26535300 | 2.44464700  |
| C  | -3.63321700 | 5.30406200  | 0.55522400  |
| C  | -3.24391400 | 5.03740500  | 2.94015700  |
| C  | -3.08674600 | 2.79916500  | 3.93720000  |
| H  | -3.00924800 | 0.74201000  | 4.64018500  |
| C  | -3.43455400 | 5.85822900  | 1.77285200  |
| H  | -3.77271200 | 5.92995000  | -0.32123200 |
| C  | -3.03387900 | 5.59092800  | 4.20708200  |
| C  | -2.88253200 | 3.39188800  | 5.18780200  |
| H  | -3.41449200 | 6.93752800  | 1.89204000  |
| C  | -2.85393100 | 4.77509300  | 5.31857600  |
| H  | -3.01187600 | 6.67143400  | 4.31521500  |
| H  | -2.74409900 | 2.75768900  | 6.05864500  |
| H  | -2.69153400 | 5.22149600  | 6.29423900  |
| C  | 3.14018600  | -2.17784900 | -0.32160800 |
| C  | 3.32846300  | -2.41976300 | -1.68268400 |
| C  | 3.98466300  | -1.27416100 | 0.35129400  |
| C  | 4.35882600  | -1.81568900 | -2.38627600 |
| H  | 2.66108300  | -3.10756100 | -2.19144800 |
| C  | 5.05867900  | -0.67373700 | -0.36119700 |
| C  | 3.79653300  | -0.91520500 | 1.73475600  |
| C  | 5.25116100  | -0.95594300 | -1.73970200 |
| H  | 4.49103400  | -2.02734900 | -3.44306400 |
| C  | 5.95411900  | 0.21780100  | 0.30838400  |
| C  | 4.63130000  | -0.05423300 | 2.35976000  |
| H  | 2.94712200  | -1.32792600 | 2.26563000  |
| C  | 6.36345900  | -0.35388400 | -2.42879300 |
| C  | 7.04446900  | 0.79683500  | -0.39546500 |
| C  | 5.74909400  | 0.53892400  | 1.67522700  |
| H  | 4.46195200  | 0.21397600  | 3.39846700  |

|    |             |             |             |
|----|-------------|-------------|-------------|
| C  | 7.22301100  | 0.47186500  | -1.78744400 |
| H  | 6.50046400  | -0.58268200 | -3.48157100 |
| C  | 7.89866300  | 1.67961200  | 0.27401000  |
| C  | 6.62498500  | 1.42693900  | 2.30798300  |
| H  | 8.05945500  | 0.91716800  | -2.31803600 |
| C  | 7.68830100  | 1.99099300  | 1.61244800  |
| H  | 8.73033700  | 2.12342200  | -0.26556500 |
| H  | 6.46383200  | 1.67527700  | 3.35299500  |
| H  | 8.35821700  | 2.67942700  | 2.11728000  |
| O  | -1.34584900 | -0.70565400 | 0.75057100  |
| O  | 0.30265400  | -1.88825200 | -0.82754600 |
| P  | -0.04669700 | -0.45719700 | -0.17915600 |
| O  | 1.01054400  | 0.20995100  | 0.58661600  |
| Br | 2.05541000  | -5.74884500 | 3.48663200  |
| N  | -0.55461500 | 0.36988200  | -1.55929100 |
| H  | -0.68934000 | 1.37979600  | -1.36643000 |
| S  | -1.16422800 | -0.14619100 | -2.99741800 |
| O  | -1.72033300 | -1.47594700 | -2.90051700 |
| O  | -1.90606500 | 0.96469500  | -3.56084100 |
| C  | 0.35689300  | -0.31626100 | -4.05247000 |
| F  | 1.29753900  | -0.98601800 | -3.40477000 |
| F  | 0.81627400  | 0.88675000  | -4.37468400 |
| F  | 0.02165300  | -0.96843500 | -5.15554300 |
| C  | 4.20230700  | 3.88064500  | -1.03463500 |
| C  | 3.09236600  | 4.71905800  | -1.06292600 |
| C  | 1.90419500  | 4.29961700  | -1.66967200 |
| C  | 1.85715300  | 3.03019500  | -2.25746400 |
| C  | 2.96269500  | 2.19055700  | -2.21852200 |
| C  | 4.13978500  | 2.61538400  | -1.60952800 |
| H  | 5.11979100  | 4.21436700  | -0.56011500 |
| H  | 3.14854400  | 5.70719600  | -0.61719600 |
| H  | 0.95102000  | 2.69715500  | -2.74829300 |
| H  | 2.90772200  | 1.20117600  | -2.66047700 |
| H  | 5.00641000  | 1.96718900  | -1.59434400 |
| C  | 0.70692500  | 5.15817000  | -1.63184800 |
| C  | 0.35185900  | 6.18745800  | -0.60399400 |
| C  | -0.65903000 | 4.89431800  | -2.17436800 |
| C  | -0.49182400 | 4.95374000  | -0.68827900 |
| H  | -0.09349100 | 7.12772300  | -0.92776600 |
| H  | 1.00874600  | 6.26869100  | 0.25798600  |
| H  | -1.20035500 | 5.71423800  | -2.64560300 |
| H  | -0.85694200 | 3.91730300  | -2.60638700 |
| C  | -0.46668200 | 3.78561500  | 0.17950900  |
| O  | -0.70685700 | 2.65309400  | -0.21179600 |

|   |             |            |            |
|---|-------------|------------|------------|
| O | -0.09926200 | 4.05945800 | 1.42336600 |
| C | 0.10128200  | 2.91920100 | 2.27631000 |
| H | 0.34012500  | 3.33198000 | 3.25448300 |
| H | -0.80801500 | 2.31977000 | 2.32638800 |
| H | 0.91195700  | 2.29997500 | 1.89075400 |

**TS1**

|    |             |             |             |
|----|-------------|-------------|-------------|
| C  | 3.98940600  | -0.66050600 | 0.02317400  |
| C  | 4.98935800  | -1.30591000 | -0.70577700 |
| C  | 4.85768300  | -2.65436100 | -0.99161000 |
| C  | 3.73005400  | -3.36257700 | -0.59370200 |
| C  | 2.68679300  | -2.71709100 | 0.07295900  |
| C  | 2.83811600  | -1.35186400 | 0.35589600  |
| C  | 5.41394900  | 1.02313700  | -0.82085500 |
| C  | 6.07525300  | -0.33945600 | -1.09570800 |
| H  | 3.64012400  | -4.41734100 | -0.82755300 |
| H  | 4.83718600  | 1.33459500  | -1.69736200 |
| H  | 6.13192700  | 1.81343300  | -0.58836000 |
| H  | 6.97143700  | -0.49187100 | -0.48245700 |
| C  | 4.43099400  | 0.75522000  | 0.35590400  |
| C  | 3.46141600  | 1.91198700  | 0.54357700  |
| C  | 5.19333600  | 0.80753000  | 1.71169900  |
| C  | 4.00370900  | 2.83984400  | 1.43758400  |
| C  | 2.23262500  | 2.17664700  | -0.03722400 |
| C  | 5.26182600  | 2.30317800  | 2.06641500  |
| H  | 4.60576900  | 0.27630100  | 2.46737600  |
| H  | 6.17528300  | 0.33218600  | 1.65153900  |
| C  | 3.35109900  | 4.04147000  | 1.65578000  |
| C  | 1.56834500  | 3.39450100  | 0.16123300  |
| H  | 6.14648100  | 2.78648400  | 1.63504000  |
| C  | 2.15428500  | 4.33404700  | 1.00840800  |
| H  | 1.65941800  | 5.28403200  | 1.17570400  |
| H  | 6.37622900  | -0.46304500 | -2.13904900 |
| H  | 5.29097300  | 2.48516200  | 3.14367300  |
| Br | 6.22933000  | -3.54286300 | -1.95313800 |
| C  | 1.40464500  | -3.42261300 | 0.34416900  |
| C  | 0.75842700  | -4.03262000 | -0.73317800 |
| C  | 0.78566800  | -3.42086300 | 1.61082900  |
| C  | -0.50848500 | -4.57791000 | -0.60560300 |
| H  | 1.23700300  | -4.02010900 | -1.70661100 |
| C  | -0.52258900 | -3.96361700 | 1.74120000  |
| C  | 1.42473400  | -2.89622100 | 2.79162400  |
| C  | -1.17794400 | -4.53551900 | 0.61862900  |
| H  | -1.00488400 | -5.00270200 | -1.47152900 |

|   |             |             |             |
|---|-------------|-------------|-------------|
| C | -1.19931300 | -3.91261100 | 3.00120500  |
| C | 0.79041000  | -2.86210000 | 3.98535400  |
| H | 2.44172100  | -2.52885300 | 2.71200900  |
| C | -2.51782700 | -5.04125300 | 0.76953000  |
| C | -2.52363300 | -4.41443300 | 3.12191000  |
| C | -0.55514100 | -3.34950000 | 4.13363800  |
| H | 1.29324500  | -2.46173200 | 4.86073400  |
| C | -3.15976800 | -4.98248900 | 1.95996700  |
| H | -3.00906600 | -5.45383600 | -0.10503100 |
| C | -3.17410600 | -4.33475100 | 4.35779700  |
| C | -1.23824500 | -3.29350200 | 5.35308200  |
| H | -4.17180800 | -5.36462400 | 2.06043900  |
| C | -2.53597500 | -3.77954900 | 5.46105000  |
| H | -4.18801800 | -4.71396000 | 4.44778800  |
| H | -0.74293900 | -2.86267500 | 6.21838400  |
| H | -3.05428000 | -3.72618800 | 6.41297300  |
| C | 0.29613900  | 3.67413300  | -0.56694200 |
| C | 0.36954900  | 3.87675600  | -1.94576700 |
| C | -0.95613600 | 3.70103900  | 0.07524900  |
| C | -0.76749400 | 4.09008500  | -2.70751400 |
| H | 1.34123800  | 3.84993100  | -2.42739800 |
| C | -2.12815700 | 3.89795600  | -0.70797200 |
| C | -1.10897500 | 3.49766200  | 1.49407600  |
| C | -2.03009400 | 4.09011200  | -2.11098100 |
| H | -0.68241100 | 4.23542400  | -3.78009100 |
| C | -3.41805300 | 3.87489700  | -0.08901600 |
| C | -2.32843600 | 3.48292500  | 2.07808700  |
| H | -0.22040100 | 3.32443700  | 2.08872800  |
| C | -3.23462300 | 4.25976000  | -2.88149300 |
| C | -4.59101100 | 4.04489300  | -0.87403500 |
| C | -3.53230500 | 3.66404000  | 1.31027200  |
| H | -2.41991800 | 3.31615600  | 3.14721100  |
| C | -4.45342600 | 4.23717700  | -2.29483500 |
| H | -3.14155100 | 4.40298100  | -3.95404700 |
| C | -5.84293500 | 4.01516700  | -0.24820500 |
| C | -4.80274300 | 3.63131600  | 1.89576200  |
| H | -5.35426900 | 4.36352500  | -2.88817000 |
| C | -5.94484000 | 3.81030000  | 1.12358900  |
| H | -6.73841100 | 4.14982900  | -0.84817100 |
| H | -4.88841100 | 3.46563900  | 2.96559400  |
| H | -6.92265400 | 3.78310100  | 1.59329300  |
| O | 1.80047200  | -0.66875800 | 0.96169300  |
| O | 1.60274300  | 1.18590400  | -0.78088800 |
| P | 0.71281900  | 0.14786700  | 0.09059800  |

|    |             |             |             |
|----|-------------|-------------|-------------|
| O  | -0.25549200 | 0.72101700  | 1.04664000  |
| Br | 4.09482600  | 5.30475700  | 2.85795800  |
| N  | -0.00033300 | -0.78175600 | -1.05116700 |
| H  | -1.34745500 | -0.93462300 | -0.82060100 |
| S  | 0.42212400  | -1.10837400 | -2.56774600 |
| O  | 1.85619100  | -1.22717300 | -2.76947000 |
| O  | -0.47215800 | -2.14851700 | -3.05386200 |
| C  | -0.10639800 | 0.41233200  | -3.51453400 |
| F  | 0.88136900  | 1.29352000  | -3.57939100 |
| F  | -1.16017200 | 0.97123000  | -2.92585300 |
| F  | -0.44352500 | 0.05146800  | -4.74899400 |
| C  | -7.40945900 | 0.16599700  | -0.09793400 |
| C  | -6.03660100 | 0.35685700  | -0.00675700 |
| C  | -5.19948000 | -0.71019400 | 0.33703100  |
| C  | -5.75138400 | -1.97240800 | 0.59211200  |
| C  | -7.12250200 | -2.16022600 | 0.48345700  |
| C  | -7.95262900 | -1.09323700 | 0.14172700  |
| H  | -8.05197700 | 1.00182300  | -0.35356700 |
| H  | -5.61736200 | 1.34299000  | -0.17622500 |
| H  | -5.11347400 | -2.81083000 | 0.85020500  |
| H  | -7.54648900 | -3.14114600 | 0.66864100  |
| H  | -9.02447400 | -1.24485200 | 0.06718800  |
| C  | -3.75962100 | -0.44683400 | 0.46675300  |
| C  | -3.02900200 | 0.49092100  | -0.37177100 |
| C  | -2.74548700 | -1.39572600 | 0.89394300  |
| C  | -2.61173000 | -1.01548800 | -0.62323400 |
| H  | -2.19376000 | 1.03781000  | 0.05957900  |
| H  | -3.57594600 | 1.00257700  | -1.15759600 |
| H  | -1.88714000 | -1.01659800 | 1.44380900  |
| H  | -3.05515700 | -2.40377500 | 1.14744600  |
| C  | -3.22966100 | -1.85713300 | -1.68494500 |
| O  | -3.50299900 | -3.02955200 | -1.56010200 |
| O  | -3.39815700 | -1.14803000 | -2.80060700 |
| C  | -3.82227500 | -1.89129400 | -3.94735500 |
| H  | -3.90479900 | -1.16444600 | -4.75284700 |
| H  | -3.07450000 | -2.64769600 | -4.19123900 |
| H  | -4.78576200 | -2.36877400 | -3.76049300 |

**ωB97X-D/SMD**

**React**

|   |             |             |             |
|---|-------------|-------------|-------------|
| C | -2.08879900 | -2.02970400 | 0.53208800  |
| C | -3.15843300 | -2.80218400 | 0.06744700  |
| C | -4.31200900 | -2.17618200 | -0.37074900 |
| C | -4.41292900 | -0.79008600 | -0.37654500 |

|    |             |             |             |
|----|-------------|-------------|-------------|
| C  | -3.33024200 | -0.00231300 | 0.01578900  |
| C  | -2.16222600 | -0.65004500 | 0.44470500  |
| C  | -1.29642800 | -4.24814200 | 0.32101600  |
| C  | -2.81843500 | -4.26758000 | 0.10363200  |
| H  | -5.32358600 | -0.30837400 | -0.71436300 |
| H  | -0.78550500 | -4.17907700 | -0.64416100 |
| H  | -0.92315900 | -5.13407600 | 0.83993400  |
| H  | -3.34437200 | -4.76660100 | 0.92609800  |
| C  | -1.03127200 | -2.94409700 | 1.12613900  |
| C  | 0.44775700  | -2.60392500 | 1.15296100  |
| C  | -1.29244600 | -3.18934500 | 2.64030700  |
| C  | 1.04593300  | -3.21048000 | 2.26065300  |
| C  | 1.23136300  | -1.88030500 | 0.27022400  |
| C  | 0.00813300  | -3.82241600 | 3.16221100  |
| H  | -1.45544500 | -2.22460900 | 3.13180400  |
| H  | -2.17482100 | -3.81076400 | 2.81010100  |
| C  | 2.42233700  | -3.15711500 | 2.40183300  |
| C  | 2.62295900  | -1.81248900 | 0.39947900  |
| H  | 0.00237000  | -4.91400600 | 3.05973400  |
| C  | 3.20953300  | -2.48661000 | 1.47373100  |
| H  | 4.28726600  | -2.45987100 | 1.58868600  |
| H  | -3.10799700 | -4.77616200 | -0.81972100 |
| H  | 0.19569200  | -3.59811800 | 4.21544400  |
| Br | -5.77004000 | -3.22081800 | -0.98534500 |
| C  | -3.40451700 | 1.47931500  | -0.10825100 |
| C  | -3.66298700 | 2.02417200  | -1.37097800 |
| C  | -3.20598900 | 2.33850800  | 0.99174400  |
| C  | -3.68850700 | 3.39562100  | -1.57754600 |
| H  | -3.82144100 | 1.35440200  | -2.21032100 |
| C  | -3.23012500 | 3.74588600  | 0.78125900  |
| C  | -2.99798400 | 1.85188700  | 2.33285400  |
| C  | -3.46444900 | 4.27648600  | -0.51589300 |
| H  | -3.87366100 | 3.78999300  | -2.57209900 |
| C  | -3.01330600 | 4.63865500  | 1.87744400  |
| C  | -2.80012300 | 2.69890400  | 3.36874700  |
| H  | -3.01505600 | 0.78253000  | 2.51125800  |
| C  | -3.46672900 | 5.70447400  | -0.70155200 |
| C  | -3.02082200 | 6.04362900  | 1.66575900  |
| C  | -2.78941900 | 4.12502400  | 3.18135600  |
| H  | -2.64863300 | 2.30971100  | 4.37146800  |
| C  | -3.25404500 | 6.54565000  | 0.33636700  |
| H  | -3.64255500 | 6.09158600  | -1.70096800 |
| C  | -2.80156300 | 6.89845000  | 2.75125500  |
| C  | -2.57644800 | 5.01326200  | 4.24094100  |

|    |             |             |             |
|----|-------------|-------------|-------------|
| H  | -3.25600700 | 7.62118700  | 0.18430200  |
| C  | -2.58148600 | 6.38638300  | 4.02494000  |
| H  | -2.80453700 | 7.97231800  | 2.58752200  |
| H  | -2.40594600 | 4.61741800  | 5.23801300  |
| H  | -2.41275000 | 7.06373400  | 4.85609100  |
| C  | 3.46485600  | -1.07906800 | -0.58394900 |
| C  | 3.43603500  | -1.48369500 | -1.91958700 |
| C  | 4.30456900  | -0.01710600 | -0.19246100 |
| C  | 4.24211400  | -0.88237000 | -2.87260600 |
| H  | 2.77285100  | -2.29114900 | -2.21198300 |
| C  | 5.14120400  | 0.59386200  | -1.16776700 |
| C  | 4.33430900  | 0.50197500  | 1.15289400  |
| C  | 5.11167000  | 0.15179800  | -2.51723800 |
| H  | 4.20291600  | -1.21721200 | -3.90479500 |
| C  | 6.01811200  | 1.66070500  | -0.79509200 |
| C  | 5.16155900  | 1.51401700  | 1.50197200  |
| H  | 3.66169600  | 0.07950600  | 1.89034100  |
| C  | 5.97550600  | 0.78320900  | -3.48117700 |
| C  | 6.86421300  | 2.26188800  | -1.76604200 |
| C  | 6.04548800  | 2.12565300  | 0.54592100  |
| H  | 5.16067400  | 1.89361000  | 2.51980100  |
| C  | 6.81212600  | 1.78456800  | -3.12394700 |
| H  | 5.93895700  | 0.43333400  | -4.50894800 |
| C  | 7.71928000  | 3.29916200  | -1.37810400 |
| C  | 6.91332000  | 3.16687600  | 0.89288100  |
| H  | 7.46059700  | 2.25189400  | -3.85973600 |
| C  | 7.74270500  | 3.74485200  | -0.06124900 |
| H  | 8.36678800  | 3.75678100  | -2.12084700 |
| H  | 6.93030700  | 3.52224100  | 1.91935000  |
| H  | 8.41076800  | 4.55198600  | 0.22273700  |
| O  | -1.04767800 | 0.12383800  | 0.75611500  |
| O  | 0.59671800  | -1.15333500 | -0.74270900 |
| P  | 0.12724500  | 0.32207800  | -0.32857900 |
| O  | 1.12603000  | 1.27098300  | 0.17295000  |
| Br | 3.24613500  | -4.00403800 | 3.88549200  |
| N  | -0.69577200 | 0.73822700  | -1.75055100 |
| H  | -1.28638600 | 1.56930000  | -1.68677100 |
| S  | -0.50156500 | 0.23257400  | -3.31261600 |
| O  | -1.10256900 | 1.25547500  | -4.14217200 |
| O  | 0.83069300  | -0.27363400 | -3.53803900 |
| C  | -1.64191900 | -1.23212400 | -3.42353200 |
| F  | -2.87971200 | -0.85684400 | -3.13354800 |
| F  | -1.26132700 | -2.18888100 | -2.59347200 |
| F  | -1.59671400 | -1.68127700 | -4.67004800 |



**CBA**

|    |             |             |             |
|----|-------------|-------------|-------------|
| C  | -2.60755400 | -2.61395400 | -0.03023900 |
| C  | -3.67749800 | -3.13694100 | -0.76049200 |
| C  | -4.69584700 | -2.29486500 | -1.16876300 |
| C  | -4.66349200 | -0.94155700 | -0.86249200 |
| C  | -3.57168400 | -0.38738400 | -0.18768800 |
| C  | -2.52516900 | -1.24684200 | 0.18138800  |
| C  | -2.02233200 | -4.82687900 | -0.62641600 |
| C  | -3.49599100 | -4.61009300 | -1.00636600 |
| H  | -5.48355300 | -0.29640700 | -1.15674000 |
| H  | -1.38567700 | -4.62301100 | -1.49319800 |
| H  | -1.80919700 | -5.83970600 | -0.27585200 |
| H  | -4.17378400 | -5.19546600 | -0.37358900 |
| C  | -1.73893500 | -3.75657700 | 0.46486600  |
| C  | -0.25234300 | -3.61851300 | 0.72860800  |
| C  | -2.23009100 | -4.25926500 | 1.85384100  |
| C  | 0.12481100  | -4.48700700 | 1.75624800  |
| C  | 0.70954100  | -2.84990900 | 0.09478400  |
| C  | -1.08072800 | -5.13072400 | 2.38507700  |
| H  | -2.37034100 | -3.39563000 | 2.51223200  |
| H  | -3.18157200 | -4.79197000 | 1.78598600  |
| C  | 1.46597600  | -4.62507800 | 2.06948000  |
| C  | 2.06978600  | -2.98208800 | 0.39773400  |
| H  | -1.17317900 | -6.17382500 | 2.05963800  |
| C  | 2.43381200  | -3.89894800 | 1.38756900  |
| H  | 3.48290800  | -4.02085800 | 1.63274800  |
| H  | -3.70948900 | -4.87911800 | -2.04404600 |
| H  | -1.02158800 | -5.13721200 | 3.47650400  |
| Br | -6.16145300 | -2.99794100 | -2.14635500 |
| C  | -3.56746500 | 1.07834700  | 0.07553600  |
| C  | -3.78229600 | 1.94099300  | -1.00258200 |
| C  | -3.42367000 | 1.61273000  | 1.37277300  |
| C  | -3.82895900 | 3.31507200  | -0.83444900 |
| H  | -3.88936000 | 1.52198600  | -1.99751800 |
| C  | -3.44917700 | 3.02546500  | 1.54417200  |
| C  | -3.27246800 | 0.79044400  | 2.54755900  |
| C  | -3.65179100 | 3.88149700  | 0.42924600  |
| H  | -3.98192000 | 3.96153200  | -1.69364200 |
| C  | -3.25215700 | 3.59668900  | 2.84074200  |
| C  | -3.09983100 | 1.33203100  | 3.77569400  |
| H  | -3.30990100 | -0.28764500 | 2.44178200  |
| C  | -3.63905900 | 5.30774700  | 0.62646900  |
| C  | -3.22626400 | 5.00838700  | 3.00364500  |

|    |             |             |             |
|----|-------------|-------------|-------------|
| C  | -3.06204000 | 2.75646100  | 3.96891000  |
| H  | -2.98689500 | 0.69012700  | 4.64479300  |
| C  | -3.42857700 | 5.84541400  | 1.84983100  |
| H  | -3.78950300 | 5.94555500  | -0.23986600 |
| C  | -3.00190300 | 5.54472200  | 4.27593700  |
| C  | -2.84401500 | 3.33194900  | 5.22541200  |
| H  | -3.40814400 | 6.92303200  | 1.98466000  |
| C  | -2.81145200 | 4.71347800  | 5.37423900  |
| H  | -2.97736400 | 6.62388200  | 4.39817200  |
| H  | -2.69788500 | 2.68528000  | 6.08605200  |
| H  | -2.63829900 | 5.14664200  | 6.35440700  |
| C  | 3.12921800  | -2.22135600 | -0.32086100 |
| C  | 3.31441400  | -2.45779100 | -1.68385400 |
| C  | 3.98820600  | -1.33495800 | 0.35779400  |
| C  | 4.35154200  | -1.86177400 | -2.38480700 |
| H  | 2.63892700  | -3.13486000 | -2.19693000 |
| C  | 5.06609900  | -0.73914400 | -0.35375200 |
| C  | 3.81047400  | -0.98713800 | 1.74579900  |
| C  | 5.25182700  | -1.01246200 | -1.73512100 |
| H  | 4.48016600  | -2.06752900 | -3.44348300 |
| C  | 5.96958600  | 0.14247500  | 0.31854500  |
| C  | 4.65540900  | -0.13836500 | 2.37451200  |
| H  | 2.96326400  | -1.39980700 | 2.28067900  |
| C  | 6.36187900  | -0.40794700 | -2.42581000 |
| C  | 7.05845400  | 0.72318100  | -0.38679700 |
| C  | 5.77278100  | 0.45429500  | 1.68903200  |
| H  | 4.49434300  | 0.12059100  | 3.41707300  |
| C  | 7.22691200  | 0.41108800  | -1.78312900 |
| H  | 6.49105800  | -0.62857400 | -3.48158800 |
| C  | 7.91987300  | 1.59707400  | 0.28560300  |
| C  | 6.65601100  | 1.33322600  | 2.32485700  |
| H  | 8.06113500  | 0.86009600  | -2.31464600 |
| C  | 7.71807000  | 1.89805500  | 1.62791200  |
| H  | 8.75014400  | 2.04254300  | -0.25516700 |
| H  | 6.50040900  | 1.57361900  | 3.37281400  |
| H  | 8.39387300  | 2.57988000  | 2.13465100  |
| O  | -1.37149200 | -0.71209800 | 0.74758200  |
| O  | 0.29524700  | -1.87974300 | -0.82208200 |
| P  | -0.06131200 | -0.45569200 | -0.16258500 |
| O  | 0.98095200  | 0.20499100  | 0.62869400  |
| Br | 1.99040600  | -5.81553600 | 3.45012500  |
| N  | -0.54590500 | 0.39095800  | -1.53839900 |
| H  | -0.64008400 | 1.40788400  | -1.35355000 |
| S  | -1.14158400 | -0.10241500 | -2.98822900 |

|   |             |             |             |
|---|-------------|-------------|-------------|
| O | -1.69914400 | -1.43311900 | -2.91333200 |
| O | -1.87676300 | 1.01484600  | -3.54746200 |
| C | 0.38592300  | -0.26168000 | -4.03428300 |
| F | 1.32290400  | -0.93717700 | -3.38815900 |
| F | 0.84543100  | 0.94294700  | -4.34775700 |
| F | 0.05675800  | -0.90672300 | -5.14506900 |
| C | 4.24217900  | 3.93797400  | -0.98828500 |
| C | 3.13811600  | 4.78436600  | -1.02600700 |
| C | 1.95333100  | 4.37486000  | -1.64670200 |
| C | 1.90298100  | 3.10654900  | -2.23750000 |
| C | 3.00327200  | 2.26052100  | -2.19095700 |
| C | 4.17730700  | 2.67512000  | -1.56881800 |
| H | 5.15642500  | 4.26367500  | -0.50144200 |
| H | 3.19577200  | 5.77038300  | -0.57518600 |
| H | 0.99636000  | 2.77587200  | -2.72965200 |
| H | 2.94369400  | 1.27302100  | -2.63611200 |
| H | 5.03827000  | 2.01819300  | -1.54299500 |
| C | 0.76245000  | 5.24425700  | -1.62360200 |
| C | 0.39558700  | 6.26058400  | -0.58819800 |
| C | -0.59265600 | 4.99748000  | -2.19900900 |
| C | -0.45822100 | 5.03501400  | -0.70770400 |
| H | -0.03630400 | 7.20874200  | -0.90773300 |
| H | 1.03811100  | 6.32392900  | 0.28629700  |
| H | -1.11714200 | 5.82932400  | -2.66877800 |
| H | -0.78467300 | 4.02856300  | -2.65181000 |
| C | -0.45346100 | 3.85311800  | 0.14345300  |
| O | -0.68770900 | 2.72651700  | -0.26781600 |
| O | -0.11253900 | 4.11120800  | 1.39840900  |
| C | 0.09637800  | 2.96421100  | 2.23940300  |
| H | 0.23003500  | 3.36392600  | 3.24361800  |
| H | -0.76419900 | 2.29601000  | 2.20316700  |
| H | 0.98339500  | 2.42027700  | 1.91052500  |

## M1

|   |             |             |             |
|---|-------------|-------------|-------------|
| C | -2.60755400 | -2.61395400 | -0.03023900 |
| C | -3.67749800 | -3.13694100 | -0.76049200 |
| C | -4.69584700 | -2.29486500 | -1.16876300 |
| C | -4.66349200 | -0.94155700 | -0.86249200 |
| C | -3.57168400 | -0.38738400 | -0.18768800 |
| C | -2.52516900 | -1.24684200 | 0.18138800  |
| C | -2.02233200 | -4.82687900 | -0.62641600 |
| C | -3.49599100 | -4.61009300 | -1.00636600 |
| H | -5.48355300 | -0.29640700 | -1.15674000 |
| H | -1.38567700 | -4.62301100 | -1.49319800 |

|    |             |             |             |
|----|-------------|-------------|-------------|
| H  | -1.80919700 | -5.83970600 | -0.27585200 |
| H  | -4.17378400 | -5.19546600 | -0.37358900 |
| C  | -1.73893500 | -3.75657700 | 0.46486600  |
| C  | -0.25234300 | -3.61851300 | 0.72860800  |
| C  | -2.23009100 | -4.25926500 | 1.85384100  |
| C  | 0.12481100  | -4.48700700 | 1.75624800  |
| C  | 0.70954100  | -2.84990900 | 0.09478400  |
| C  | -1.08072800 | -5.13072400 | 2.38507700  |
| H  | -2.37034100 | -3.39563000 | 2.51223200  |
| H  | -3.18157200 | -4.79197000 | 1.78598600  |
| C  | 1.46597600  | -4.62507800 | 2.06948000  |
| C  | 2.06978600  | -2.98208800 | 0.39773400  |
| H  | -1.17317900 | -6.17382500 | 2.05963800  |
| C  | 2.43381200  | -3.89894800 | 1.38756900  |
| H  | 3.48290800  | -4.02085800 | 1.63274800  |
| H  | -3.70948900 | -4.87911800 | -2.04404600 |
| H  | -1.02158800 | -5.13721200 | 3.47650400  |
| Br | -6.16145300 | -2.99794100 | -2.14635500 |
| C  | -3.56746500 | 1.07834700  | 0.07553600  |
| C  | -3.78229600 | 1.94099300  | -1.00258200 |
| C  | -3.42367000 | 1.61273000  | 1.37277300  |
| C  | -3.82895900 | 3.31507200  | -0.83444900 |
| H  | -3.88936000 | 1.52198600  | -1.99751800 |
| C  | -3.44917700 | 3.02546500  | 1.54417200  |
| C  | -3.27246800 | 0.79044400  | 2.54755900  |
| C  | -3.65179100 | 3.88149700  | 0.42924600  |
| H  | -3.98192000 | 3.96153200  | -1.69364200 |
| C  | -3.25215700 | 3.59668900  | 2.84074200  |
| C  | -3.09983100 | 1.33203100  | 3.77569400  |
| H  | -3.30990100 | -0.28764500 | 2.44178200  |
| C  | -3.63905900 | 5.30774700  | 0.62646900  |
| C  | -3.22626400 | 5.00838700  | 3.00364500  |
| C  | -3.06204000 | 2.75646100  | 3.96891000  |
| H  | -2.98689500 | 0.69012700  | 4.64479300  |
| C  | -3.42857700 | 5.84541400  | 1.84983100  |
| H  | -3.78950300 | 5.94555500  | -0.23986600 |
| C  | -3.00190300 | 5.54472200  | 4.27593700  |
| C  | -2.84401500 | 3.33194900  | 5.22541200  |
| H  | -3.40814400 | 6.92303200  | 1.98466000  |
| C  | -2.81145200 | 4.71347800  | 5.37423900  |
| H  | -2.97736400 | 6.62388200  | 4.39817200  |
| H  | -2.69788500 | 2.68528000  | 6.08605200  |
| H  | -2.63829900 | 5.14664200  | 6.35440700  |
| C  | 3.12921800  | -2.22135600 | -0.32086100 |

|    |             |             |             |
|----|-------------|-------------|-------------|
| C  | 3.31441400  | -2.45779100 | -1.68385400 |
| C  | 3.98820600  | -1.33495800 | 0.35779400  |
| C  | 4.35154200  | -1.86177400 | -2.38480700 |
| H  | 2.63892700  | -3.13486000 | -2.19693000 |
| C  | 5.06609900  | -0.73914400 | -0.35375200 |
| C  | 3.81047400  | -0.98713800 | 1.74579900  |
| C  | 5.25182700  | -1.01246200 | -1.73512100 |
| H  | 4.48016600  | -2.06752900 | -3.44348300 |
| C  | 5.96958600  | 0.14247500  | 0.31854500  |
| C  | 4.65540900  | -0.13836500 | 2.37451200  |
| H  | 2.96326400  | -1.39980700 | 2.28067900  |
| C  | 6.36187900  | -0.40794700 | -2.42581000 |
| C  | 7.05845400  | 0.72318100  | -0.38679700 |
| C  | 5.77278100  | 0.45429500  | 1.68903200  |
| H  | 4.49434300  | 0.12059100  | 3.41707300  |
| C  | 7.22691200  | 0.41108800  | -1.78312900 |
| H  | 6.49105800  | -0.62857400 | -3.48158800 |
| C  | 7.91987300  | 1.59707400  | 0.28560300  |
| C  | 6.65601100  | 1.33322600  | 2.32485700  |
| H  | 8.06113500  | 0.86009600  | -2.31464600 |
| C  | 7.71807000  | 1.89805500  | 1.62791200  |
| H  | 8.75014400  | 2.04254300  | -0.25516700 |
| H  | 6.50040900  | 1.57361900  | 3.37281400  |
| H  | 8.39387300  | 2.57988000  | 2.13465100  |
| O  | -1.37149200 | -0.71209800 | 0.74758200  |
| O  | 0.29524700  | -1.87974300 | -0.82208200 |
| P  | -0.06131200 | -0.45569200 | -0.16258500 |
| O  | 0.98095200  | 0.20499100  | 0.62869400  |
| Br | 1.99040600  | -5.81553600 | 3.45012500  |
| N  | -0.54590500 | 0.39095800  | -1.53839900 |
| H  | -0.64008400 | 1.40788400  | -1.35355000 |
| S  | -1.14158400 | -0.10241500 | -2.98822900 |
| O  | -1.69914400 | -1.43311900 | -2.91333200 |
| O  | -1.87676300 | 1.01484600  | -3.54746200 |
| C  | 0.38592300  | -0.26168000 | -4.03428300 |
| F  | 1.32290400  | -0.93717700 | -3.38815900 |
| F  | 0.84543100  | 0.94294700  | -4.34775700 |
| F  | 0.05675800  | -0.90672300 | -5.14506900 |
| C  | 4.24217900  | 3.93797400  | -0.98828500 |
| C  | 3.13811600  | 4.78436600  | -1.02600700 |
| C  | 1.95333100  | 4.37486000  | -1.64670200 |
| C  | 1.90298100  | 3.10654900  | -2.23750000 |
| C  | 3.00327200  | 2.26052100  | -2.19095700 |
| C  | 4.17730700  | 2.67512000  | -1.56881800 |

|   |             |            |             |
|---|-------------|------------|-------------|
| H | 5.15642500  | 4.26367500 | -0.50144200 |
| H | 3.19577200  | 5.77038300 | -0.57518600 |
| H | 0.99636000  | 2.77587200 | -2.72965200 |
| H | 2.94369400  | 1.27302100 | -2.63611200 |
| H | 5.03827000  | 2.01819300 | -1.54299500 |
| C | 0.76245000  | 5.24425700 | -1.62360200 |
| C | 0.39558700  | 6.26058400 | -0.58819800 |
| C | -0.59265600 | 4.99748000 | -2.19900900 |
| C | -0.45822100 | 5.03501400 | -0.70770400 |
| H | -0.03630400 | 7.20874200 | -0.90773300 |
| H | 1.03811100  | 6.32392900 | 0.28629700  |
| H | -1.11714200 | 5.82932400 | -2.66877800 |
| H | -0.78467300 | 4.02856300 | -2.65181000 |
| C | -0.45346100 | 3.85311800 | 0.14345300  |
| O | -0.68770900 | 2.72651700 | -0.26781600 |
| O | -0.11253900 | 4.11120800 | 1.39840900  |
| C | 0.09637800  | 2.96421100 | 2.23940300  |
| H | 0.23003500  | 3.36392600 | 3.24361800  |
| H | -0.76419900 | 2.29601000 | 2.20316700  |
| H | 0.98339500  | 2.42027700 | 1.91052500  |

**TS1**

|   |            |             |             |
|---|------------|-------------|-------------|
| C | 3.99529300 | -0.63044800 | -0.00999500 |
| C | 4.99960500 | -1.25566600 | -0.75234400 |
| C | 4.87922700 | -2.60154100 | -1.05515300 |
| C | 3.76094900 | -3.32707600 | -0.66186200 |
| C | 2.71542900 | -2.70159800 | 0.02042900  |
| C | 2.85272700 | -1.33817100 | 0.31984300  |
| C | 5.39852800 | 1.07844500  | -0.83875600 |
| C | 6.07375200 | -0.27250400 | -1.13210400 |
| H | 3.67938600 | -4.37995100 | -0.90803700 |
| H | 4.81385700 | 1.39200400  | -1.70949700 |
| H | 6.10863000 | 1.87396000  | -0.59956400 |
| H | 6.97206600 | -0.42317600 | -0.52133300 |
| C | 4.42480500 | 0.78513700  | 0.33937200  |
| C | 3.44599900 | 1.93112000  | 0.54585200  |
| C | 5.19481000 | 0.82767200  | 1.69067800  |
| C | 3.98980700 | 2.85472400  | 1.44432400  |
| C | 2.21149100 | 2.19339000  | -0.02490000 |
| C | 5.25436400 | 2.31942900  | 2.06087900  |
| H | 4.61624300 | 0.28401000  | 2.44474800  |
| H | 6.18035700 | 0.36145800  | 1.61698500  |
| C | 3.33319700 | 4.05225200  | 1.67250100  |
| C | 1.54551400 | 3.40895200  | 0.18320100  |

|    |             |             |             |
|----|-------------|-------------|-------------|
| H  | 6.13320700  | 2.81324000  | 1.62940000  |
| C  | 2.13290400  | 4.34580100  | 1.03274400  |
| H  | 1.63466700  | 5.29307700  | 1.20687700  |
| H  | 6.37309900  | -0.37723000 | -2.17816000 |
| H  | 5.28734700  | 2.48807800  | 3.14041200  |
| Br | 6.25701800  | -3.46689800 | -2.03350600 |
| C  | 1.44585700  | -3.42931000 | 0.29396900  |
| C  | 0.79695800  | -4.03033700 | -0.78714100 |
| C  | 0.84307700  | -3.46226100 | 1.56840100  |
| C  | -0.45710000 | -4.60358100 | -0.65412300 |
| H  | 1.26375500  | -3.99368800 | -1.76581700 |
| C  | -0.45161700 | -4.03612700 | 1.70518100  |
| C  | 1.48470600  | -2.94261300 | 2.75034800  |
| C  | -1.10950500 | -4.60128800 | 0.58038000  |
| H  | -0.95556900 | -5.02291800 | -1.52197500 |
| C  | -1.11188200 | -4.02556500 | 2.97505700  |
| C  | 0.86547700  | -2.94535600 | 3.95286900  |
| H  | 2.49244400  | -2.55093700 | 2.66687300  |
| C  | -2.43527500 | -5.14091200 | 0.73946700  |
| C  | -2.42211400 | -4.56181800 | 3.10390000  |
| C  | -0.46570800 | -3.46844500 | 4.10969100  |
| H  | 1.36982300  | -2.54840600 | 4.82924800  |
| C  | -3.06131100 | -5.12159500 | 1.93961800  |
| H  | -2.92683200 | -5.55409200 | -0.13524900 |
| C  | -3.05643400 | -4.52305300 | 4.35041500  |
| C  | -1.13283100 | -3.45252400 | 5.33954500  |
| H  | -4.06202300 | -5.53115500 | 2.04732900  |
| C  | -2.41647900 | -3.97311000 | 5.45552700  |
| H  | -4.05952000 | -4.92930900 | 4.44666600  |
| H  | -0.63574600 | -3.02549600 | 6.20597500  |
| H  | -2.92273200 | -3.95097700 | 6.41553400  |
| C  | 0.26920500  | 3.69588500  | -0.53559400 |
| C  | 0.33461400  | 3.91470500  | -1.91287000 |
| C  | -0.97880200 | 3.72164800  | 0.11586300  |
| C  | -0.80621200 | 4.14889200  | -2.66346300 |
| H  | 1.30278600  | 3.88835700  | -2.40223400 |
| C  | -2.15489000 | 3.93722300  | -0.65684900 |
| C  | -1.12379200 | 3.50019300  | 1.53317600  |
| C  | -2.06475300 | 4.15251500  | -2.05747400 |
| H  | -0.72793100 | 4.31022300  | -3.73458400 |
| C  | -3.44116800 | 3.90909500  | -0.03043500 |
| C  | -2.34003400 | 3.48192500  | 2.12444800  |
| H  | -0.23304800 | 3.31773900  | 2.12211900  |
| C  | -3.27308100 | 4.34439500  | -2.81713900 |

|    |             |             |             |
|----|-------------|-------------|-------------|
| C  | -4.61831000 | 4.09530300  | -0.80584100 |
| C  | -3.54785000 | 3.67653300  | 1.36622200  |
| H  | -2.42592500 | 3.30103900  | 3.19200400  |
| C  | -4.48852900 | 4.31619400  | -2.22339100 |
| H  | -3.18493000 | 4.50829000  | -3.88742200 |
| C  | -5.86703100 | 4.05075500  | -0.17434600 |
| C  | -4.81521400 | 3.63244500  | 1.95800200  |
| H  | -5.39314100 | 4.45835700  | -2.80798300 |
| C  | -5.96151100 | 3.82053400  | 1.19403000  |
| H  | -6.76587700 | 4.19578700  | -0.76723100 |
| H  | -4.89439100 | 3.44890600  | 3.02571600  |
| H  | -6.93721500 | 3.78297300  | 1.66818700  |
| O  | 1.81335300  | -0.67630000 | 0.94653600  |
| O  | 1.57877800  | 1.20241800  | -0.76820800 |
| P  | 0.70810900  | 0.15202600  | 0.10890000  |
| O  | -0.24321200 | 0.71377800  | 1.08737200  |
| Br | 4.07898700  | 5.31407500  | 2.87865000  |
| N  | -0.02370900 | -0.77036200 | -1.02952600 |
| H  | -1.35509200 | -0.93452500 | -0.77912700 |
| S  | 0.37624200  | -1.07752000 | -2.55587000 |
| O  | 1.80822400  | -1.16573800 | -2.78451500 |
| O  | -0.50683000 | -2.12928100 | -3.03568000 |
| C  | -0.19509500 | 0.44272500  | -3.47991600 |
| F  | 0.79224100  | 1.32027600  | -3.59434600 |
| F  | -1.21675000 | 1.00944400  | -2.84614100 |
| F  | -0.59153800 | 0.08001700  | -4.69695900 |
| C  | -7.43812200 | 0.10741200  | -0.14520500 |
| C  | -6.06926300 | 0.30623500  | -0.01634400 |
| C  | -5.23231700 | -0.75866600 | 0.33690700  |
| C  | -5.78412900 | -2.02592500 | 0.56622200  |
| C  | -7.15114200 | -2.22153000 | 0.42103100  |
| C  | -7.97953600 | -1.15748200 | 0.06733700  |
| H  | -8.07934000 | 0.94206000  | -0.40938400 |
| H  | -5.65299200 | 1.29695600  | -0.16619900 |
| H  | -5.15073600 | -2.86330100 | 0.83777700  |
| H  | -7.57272200 | -3.20739700 | 0.58673000  |
| H  | -9.04832100 | -1.31552600 | -0.03724500 |
| C  | -3.79438800 | -0.49210600 | 0.49839100  |
| C  | -3.05429200 | 0.46870600  | -0.30620000 |
| C  | -2.77965200 | -1.44647400 | 0.91676100  |
| C  | -2.62953800 | -1.02881300 | -0.58557800 |
| H  | -2.22853300 | 1.01019100  | 0.14995300  |
| H  | -3.59125700 | 0.99686000  | -1.08783400 |
| H  | -1.93308600 | -1.07641200 | 1.49073100  |



|   |             |             |             |
|---|-------------|-------------|-------------|
| H | -3.08452000 | -2.46279900 | 1.14288000  |
| C | -3.22331900 | -1.84621000 | -1.67898800 |
| O | -3.49881100 | -3.02159000 | -1.58881300 |
| O | -3.36464800 | -1.11120900 | -2.78150300 |
| C | -3.75665100 | -1.82294300 | -3.95891000 |
| H | -3.78137600 | -1.08034400 | -4.75514500 |
| H | -3.02353900 | -2.59861700 | -4.18806100 |
| H | -4.74390700 | -2.27147800 | -3.82749300 |
